# Supplementary material for: Synthesis of Seven Indolizine-Derived Pentathiepines: Strong Electronic Structure Response to Nitro Substitution in Position C-9
Source: MDPI journal article supplement (doi:10.3390/molecules29010216), 2023-12-30
Supplement: s1 [file s1]

## Supporting Information

# Synthesis of seven indolizine derived pentathiepines – strong electronic structure response to nitro substitution in position C-9

Roberto Tallarita <sup>1</sup>, Lukas M. Jacobsen <sup>1</sup>, Benedict J. Elvers<sup>1</sup>, Stefan Richter<sup>1</sup>, Siva S. M. Bandaru<sup>1</sup>, Jevy V. Correia<sup>1</sup> and Carola Schulzke<sup>1,\*</sup>

<sup>1</sup> Bioinorganic Chemistry, Institute of Biochemistry, University of Greifswald, Felix-Hausdorff-Str. 4, 17489 Greifswald, Germany; [roberto.tallarita@uni-greifswald.de](mailto:roberto.tallarita@uni-greifswald.de); [lukasmanuel.jacobsen@stud.uni-greifswald.de](mailto:lukasmanuel.jacobsen@stud.uni-greifswald.de); [benedict.elvers@uni-greifswald.de](mailto:benedict.elvers@uni-greifswald.de); [stefan.richter@uni-greifswald.de](mailto:stefan.richter@uni-greifswald.de); [siva.bandaru@uni-greifswald.de](mailto:siva.bandaru@uni-greifswald.de); [correiaj@uni-greifswald.de](mailto:correiaj@uni-greifswald.de); [carola.schulzke@uni-greifswald.de](mailto:carola.schulzke@uni-greifswald.de)

\* Correspondence: [carola.schulzke@uni-greifswald.de](mailto:carola.schulzke@uni-greifswald.de); Tel.: +49 3034 420 4321

## Table of content

**Figg. S1 – S15.** <sup>1</sup>H, <sup>13</sup>C and <sup>19</sup>F NMR spectra of **3a**, **3b**, **3c**, **3d**, **3e**, **3f**, **3g**.

**Figg. S16 – S30** <sup>1</sup>H, <sup>13</sup>C and <sup>19</sup>F NMR spectra of **2a**, **2b**, **2c**, **2d**, **2e**, **2f**, **2g**.

**Figg. S31 – S37.** UV-Vis spectra of **3a**, **3b**, **3c**, **3d**, **3e**, **3f**, **3g**.

**Figg. S38 – S44.** IR spectra of **3a**, **3b**, **3c**, **3d**, **3e**, **3f**, **3g**.

**Figg. S45 – S51.** APCI Mass spectra of **3a**, **3b**, **3c**, **3d**, **3e**, **3f**, **3g**.

**Figg. S52 – S58.** APCI Mass spectra of **2a**, **2b**, **2c**, **2d**, **2e**, **2f**, **2g**.

**Tables S1 – S7.** Quantum Chemical Calculations for **3a** and **3f**.

**Tables S8 – S14.** Crystal data and structure refinement for **3a**, **3b**, **3c**, **3d**, **3e**, **3f**, **3g**.

Synthesis of **1b**

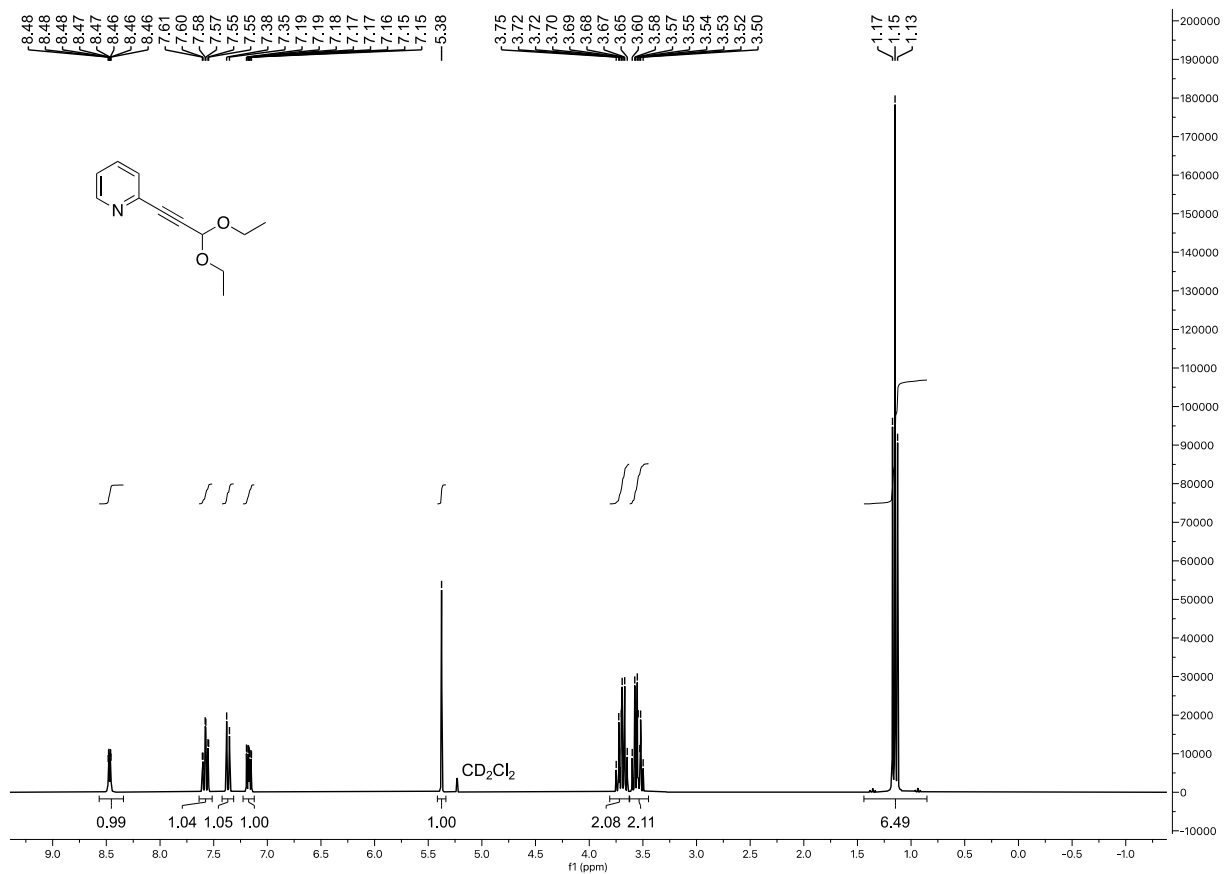

Figure S1. <sup>1</sup>H NMR spectrum of 2-(3,3-diethoxyprop-1-yn-1-yl)pyridine (**2a**).

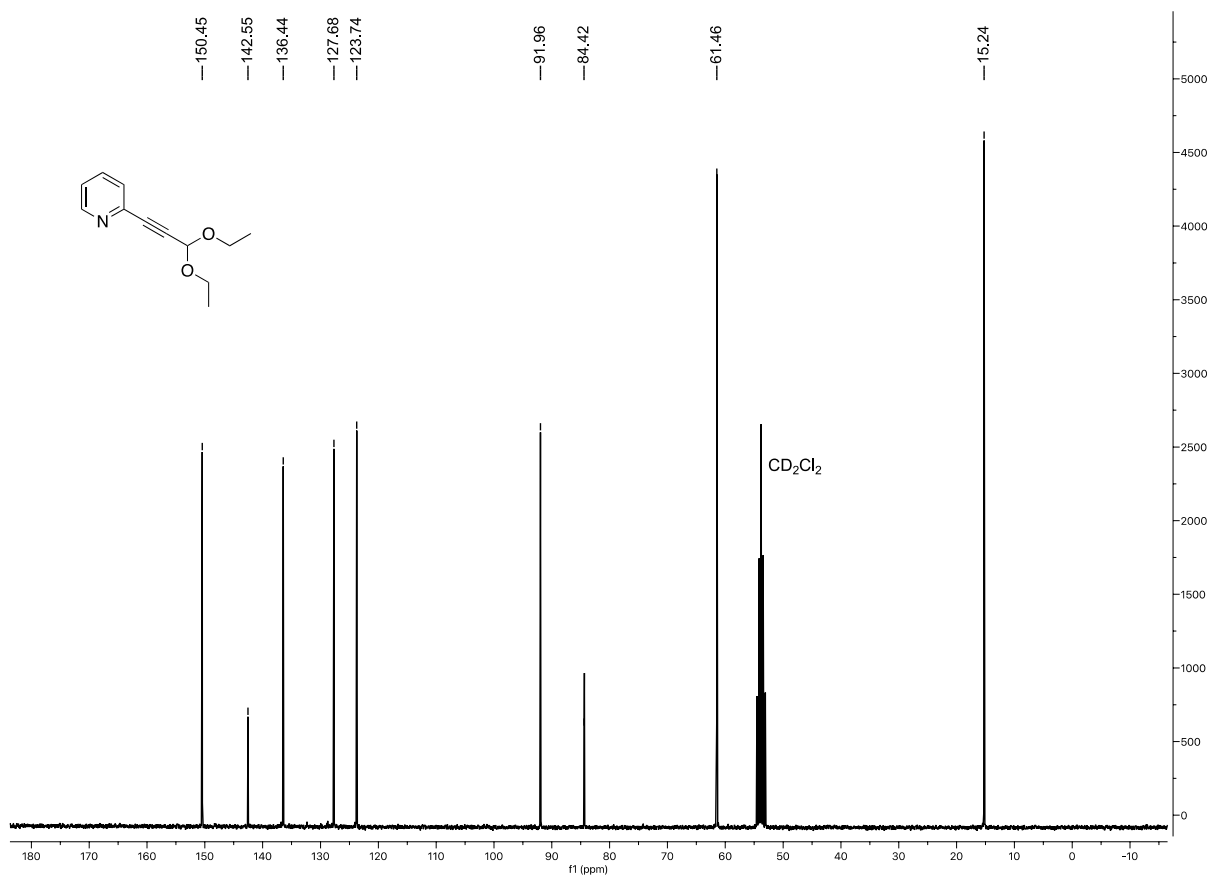

Figure S2. <sup>13</sup>C NMR spectrum of 2-(3,3-diethoxyprop-1-yn-1-yl)pyridine (**2a**).

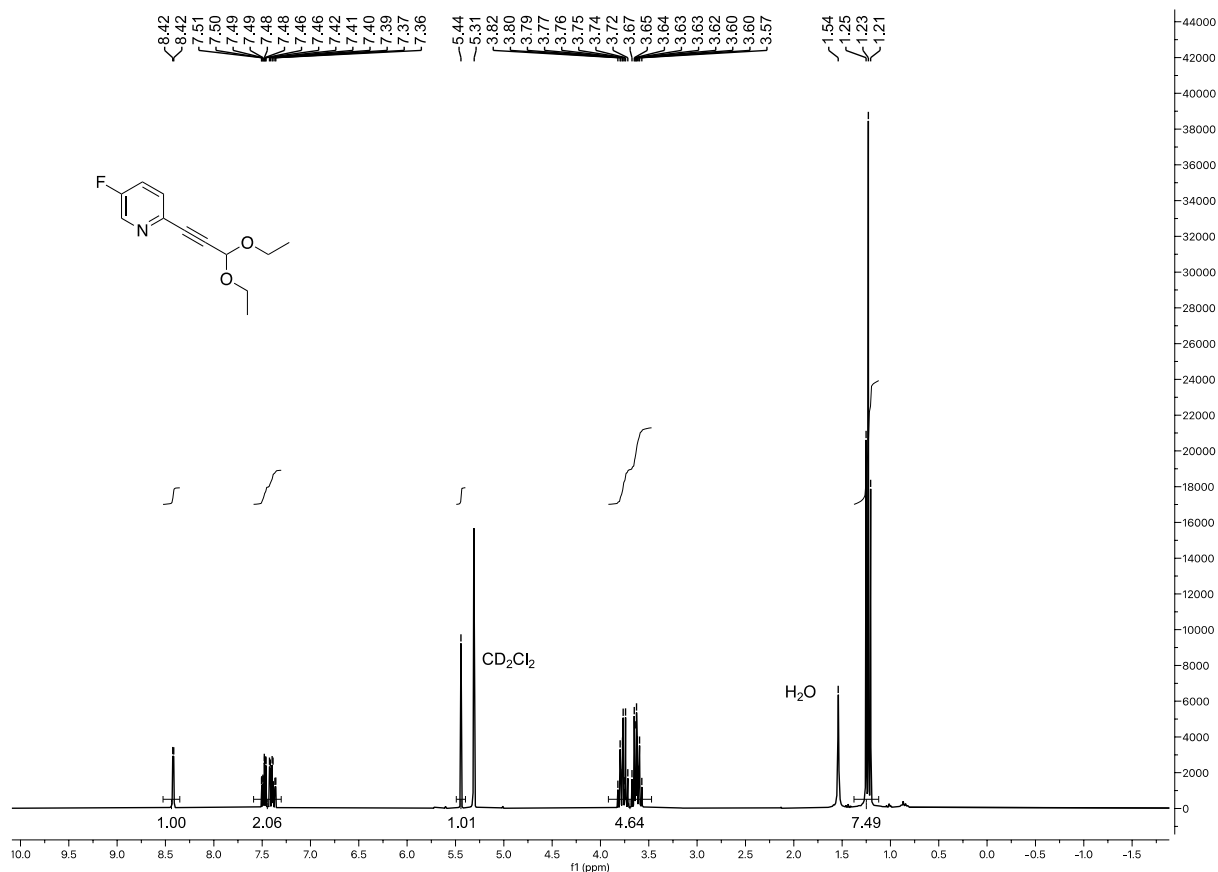

Figure S3. <sup>1</sup>H NMR spectrum of 5-fluoro-2-(3,3-diethoxyprop-1-yn-1-yl)pyridine (2b).

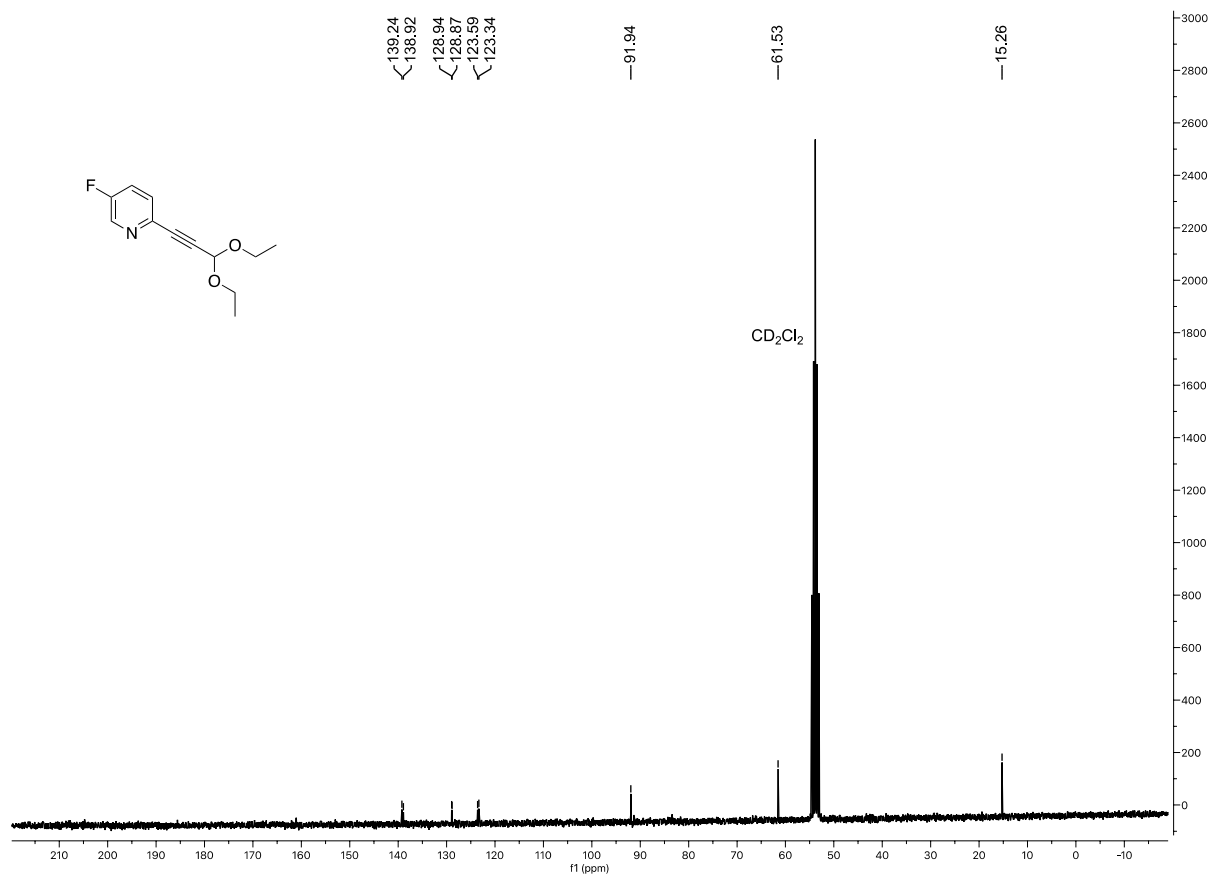

Figure S4. <sup>13</sup>C NMR spectrum of 5-fluoro-2-(3,3-diethoxyprop-1-yn-1-yl)pyridine (2b).

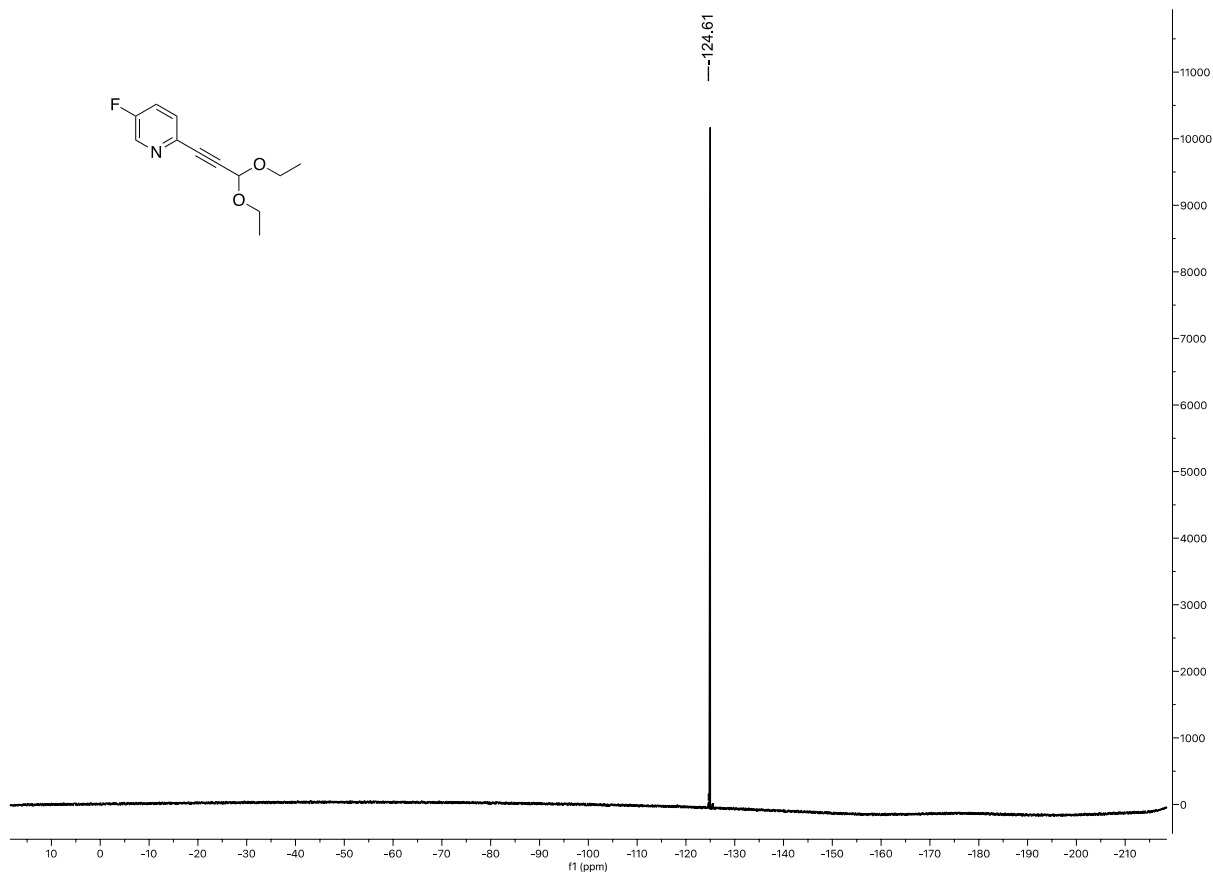

Figure S5. <sup>19</sup>F NMR spectrum of 5-fluoro-2-(3,3-diethoxyprop-1-yn-1-yl)pyridine (2b).

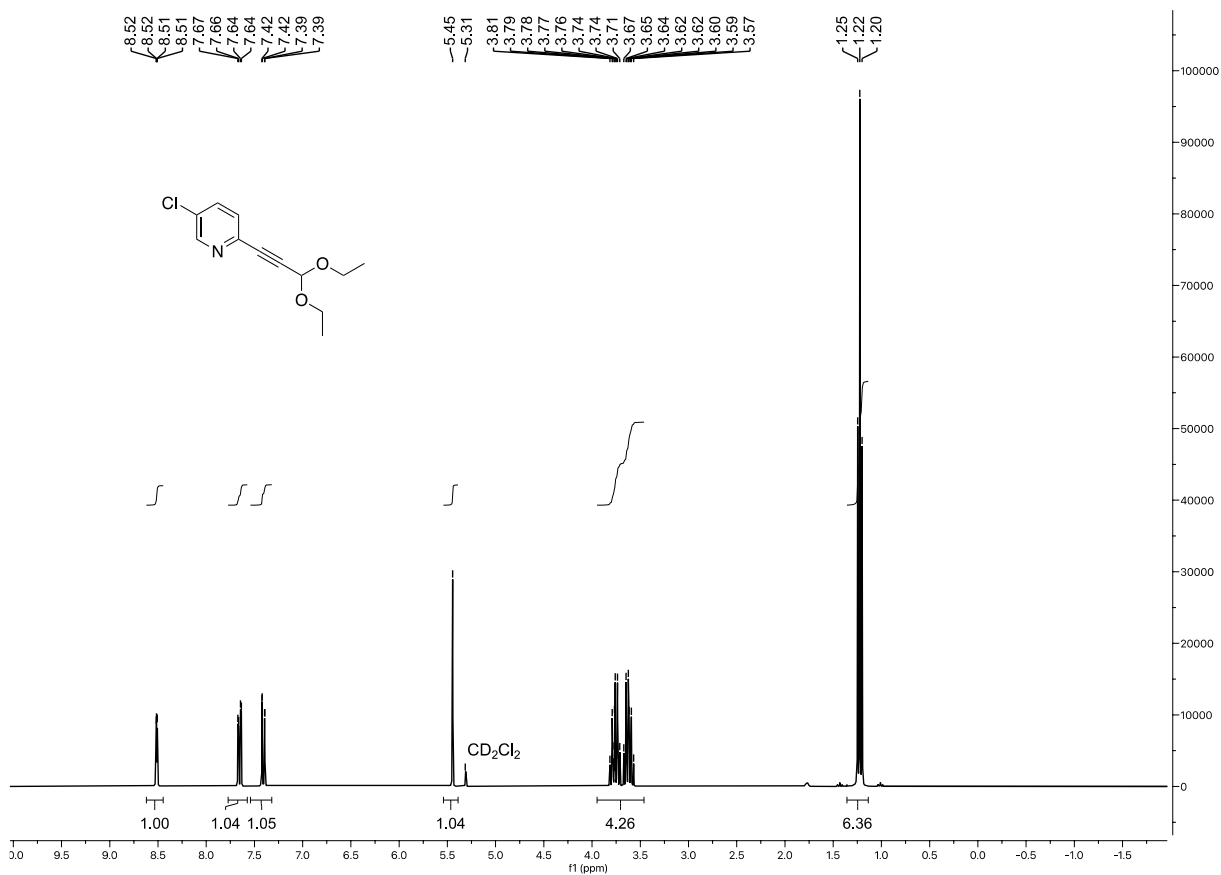

Figure S6. <sup>1</sup>H NMR spectrum of 5-chloro-2-(3,3-diethoxyprop-1-yn-1-yl)pyridine (2c).

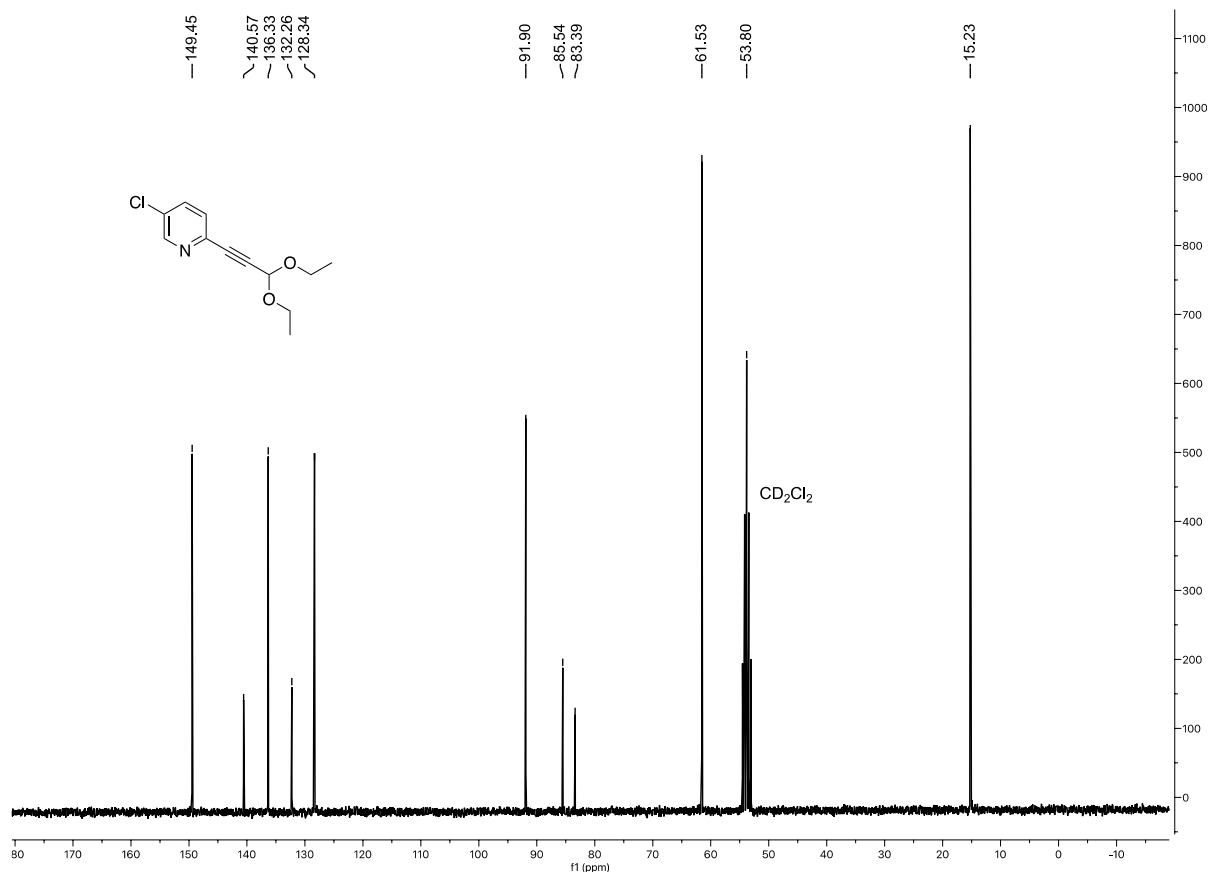

Figure S7. <sup>13</sup>C NMR spectrum of 5-chloro-2-(3,3-diethoxyprop-1-yn-1-yl)pyridine (**2c**).

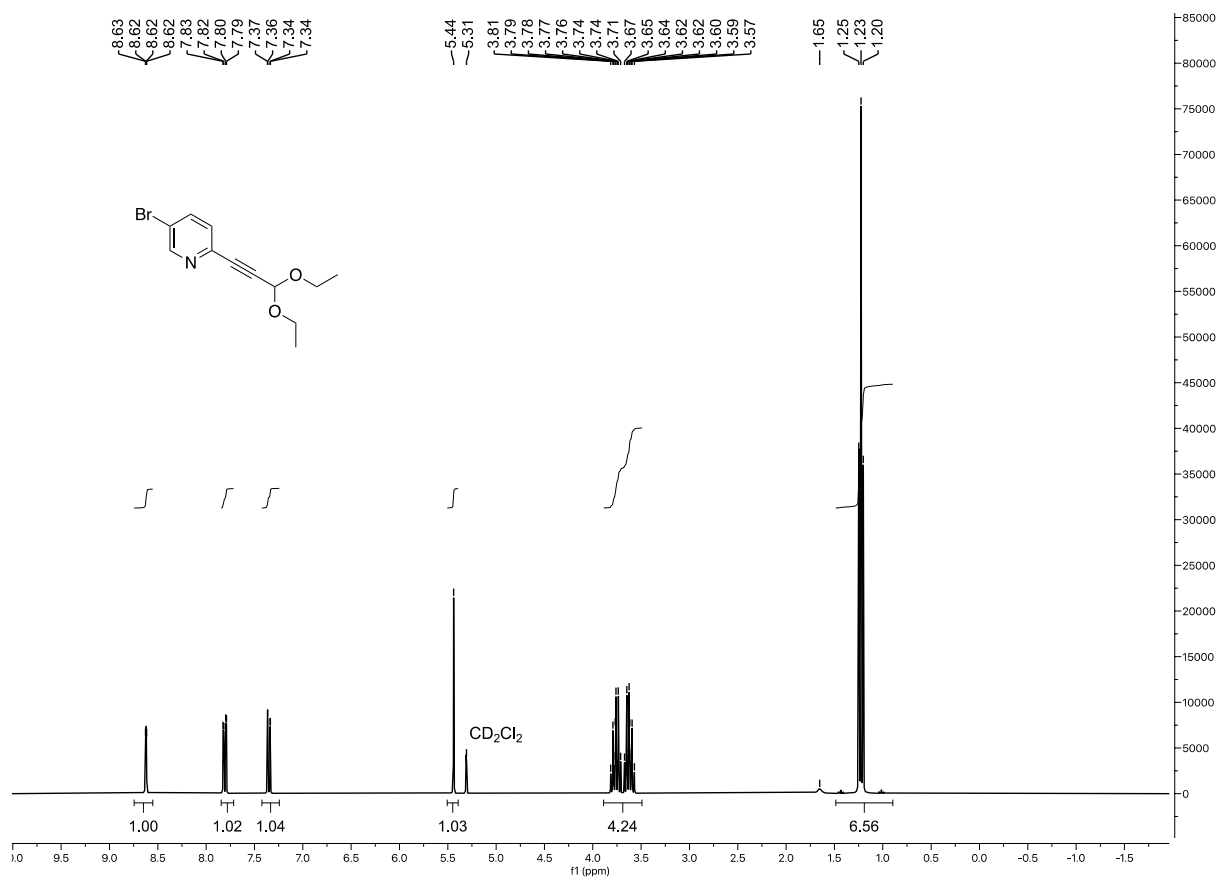

Figure S8. <sup>1</sup>H NMR spectrum of 5-bromo-2-(3,3-diethoxyprop-1-yn-1-yl)pyridine (**2d**).

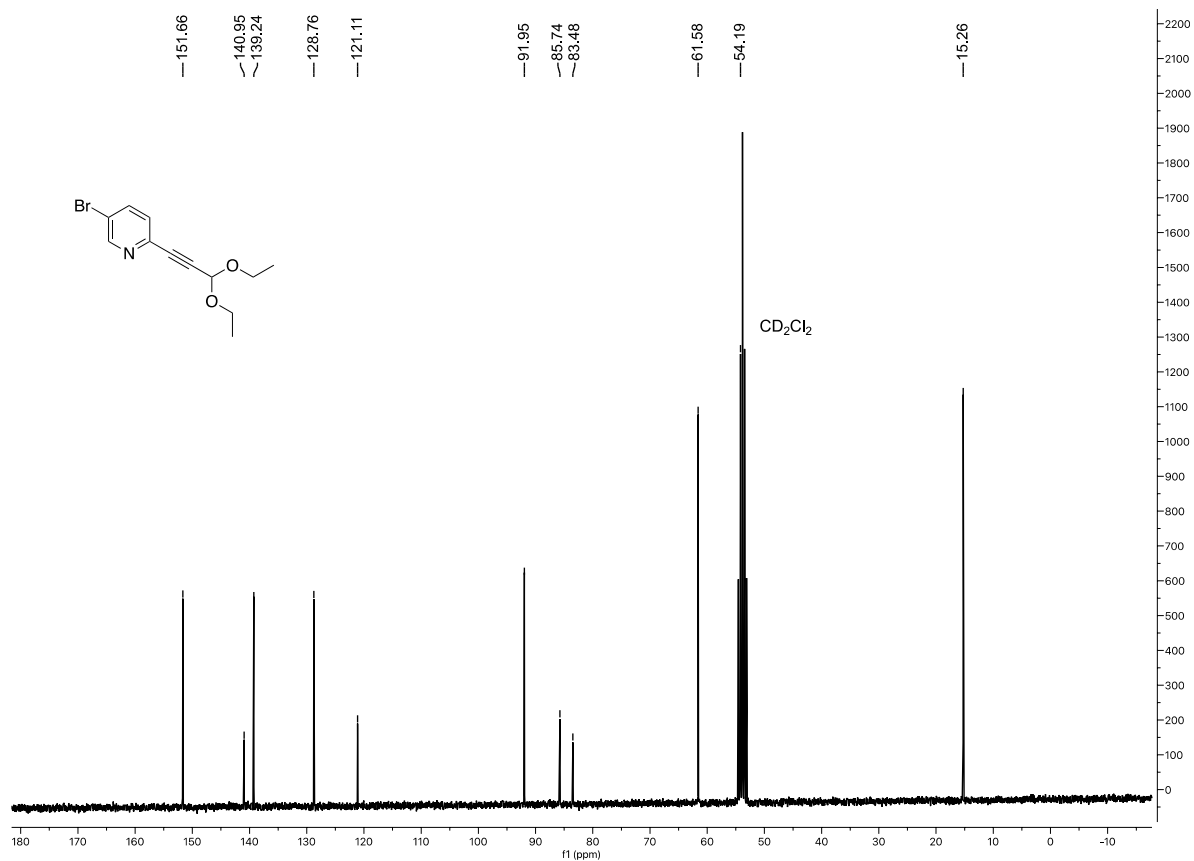

Figure S9. <sup>13</sup>C NMR spectrum of 5-bromo-2-(3,3-diethoxyprop-1-yn-1-yl)pyridine (2d).

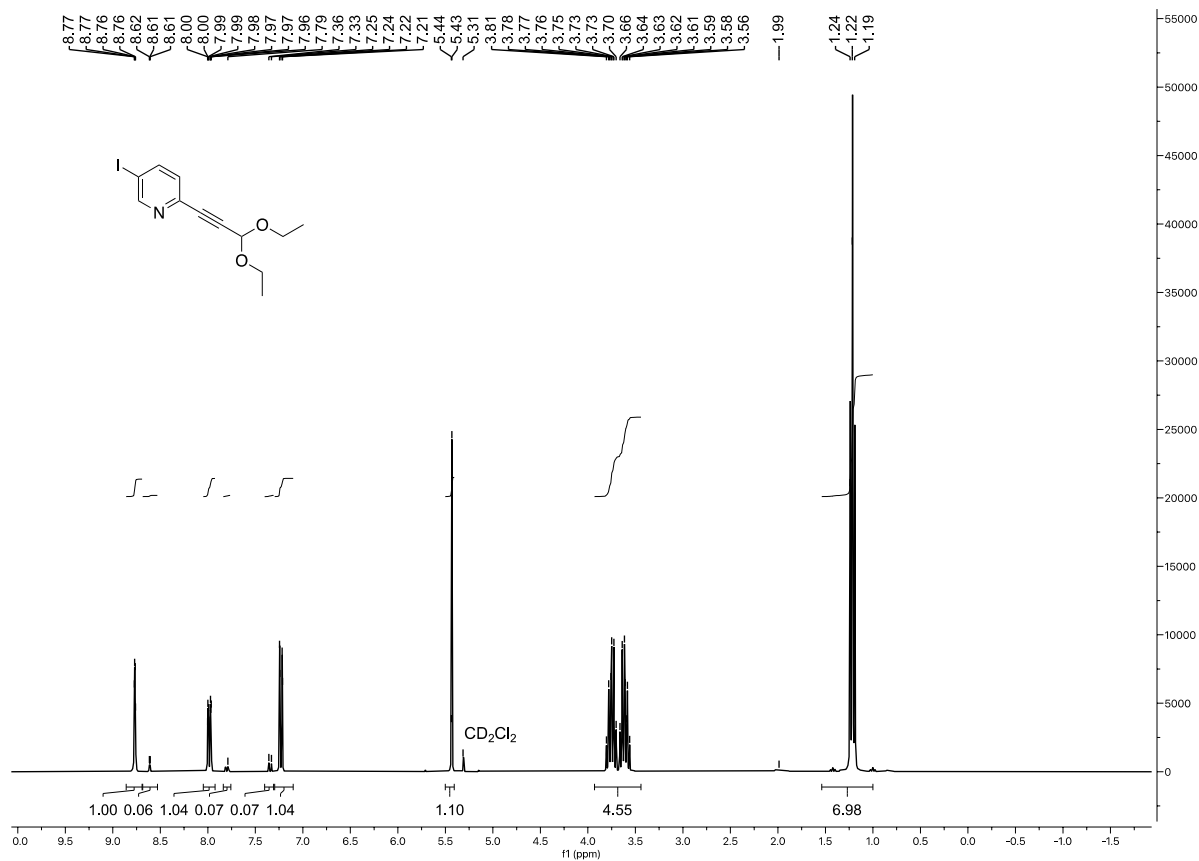

Figure S10. <sup>1</sup>H NMR spectrum of 5-iodo-2-(3,3-diethoxyprop-1-yn-1-yl)pyridine (2e).

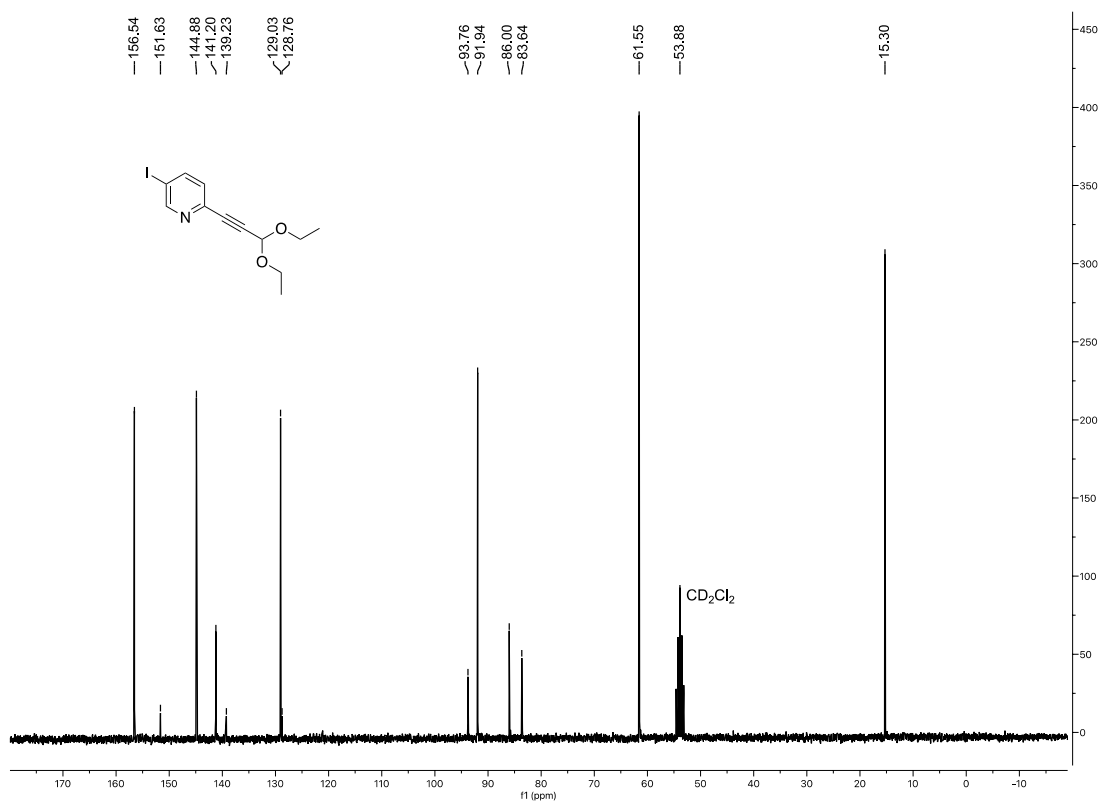

Figure S11. <sup>13</sup>C NMR spectrum of 5-iodo-2-(3,3-diethoxyprop-1-yn-1-yl)pyridine (2e)

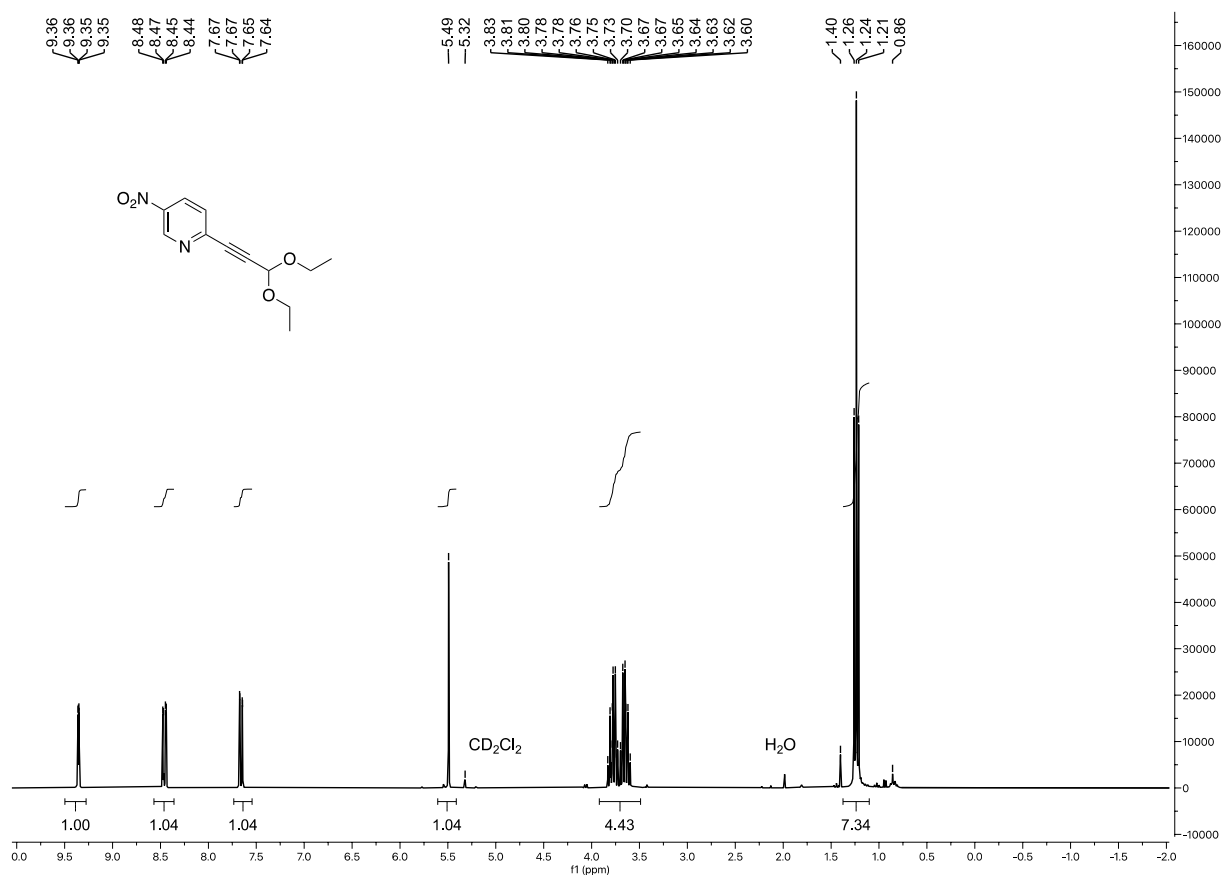

Figure S12. <sup>1</sup>H NMR spectrum of 5-nitro-2-(3,3-diethoxyprop-1-yn-1-yl)pyridine (2f)

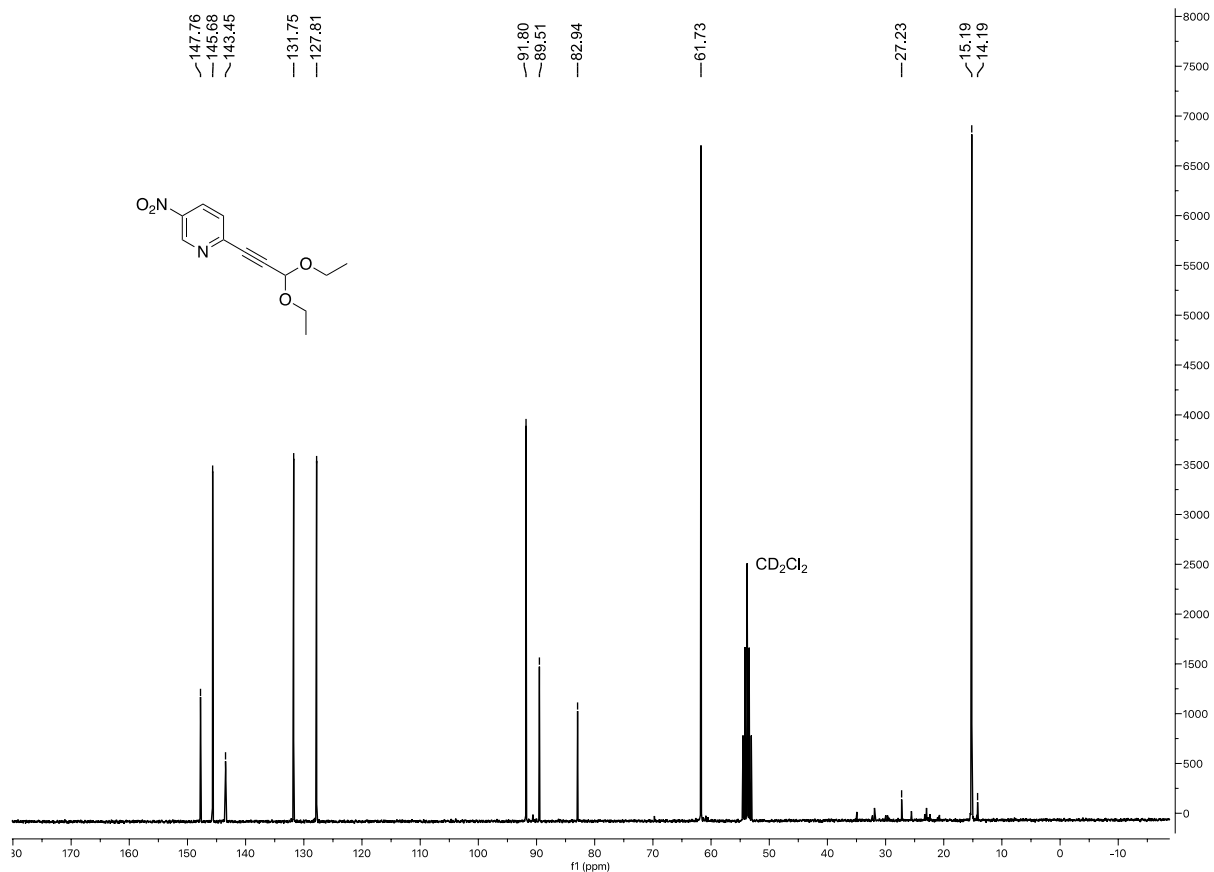

Figure S13. <sup>13</sup>C NMR spectrum of 5-nitro-2-(3,3-diethoxyprop-1-yn-1-yl)pyridine (**2f**).

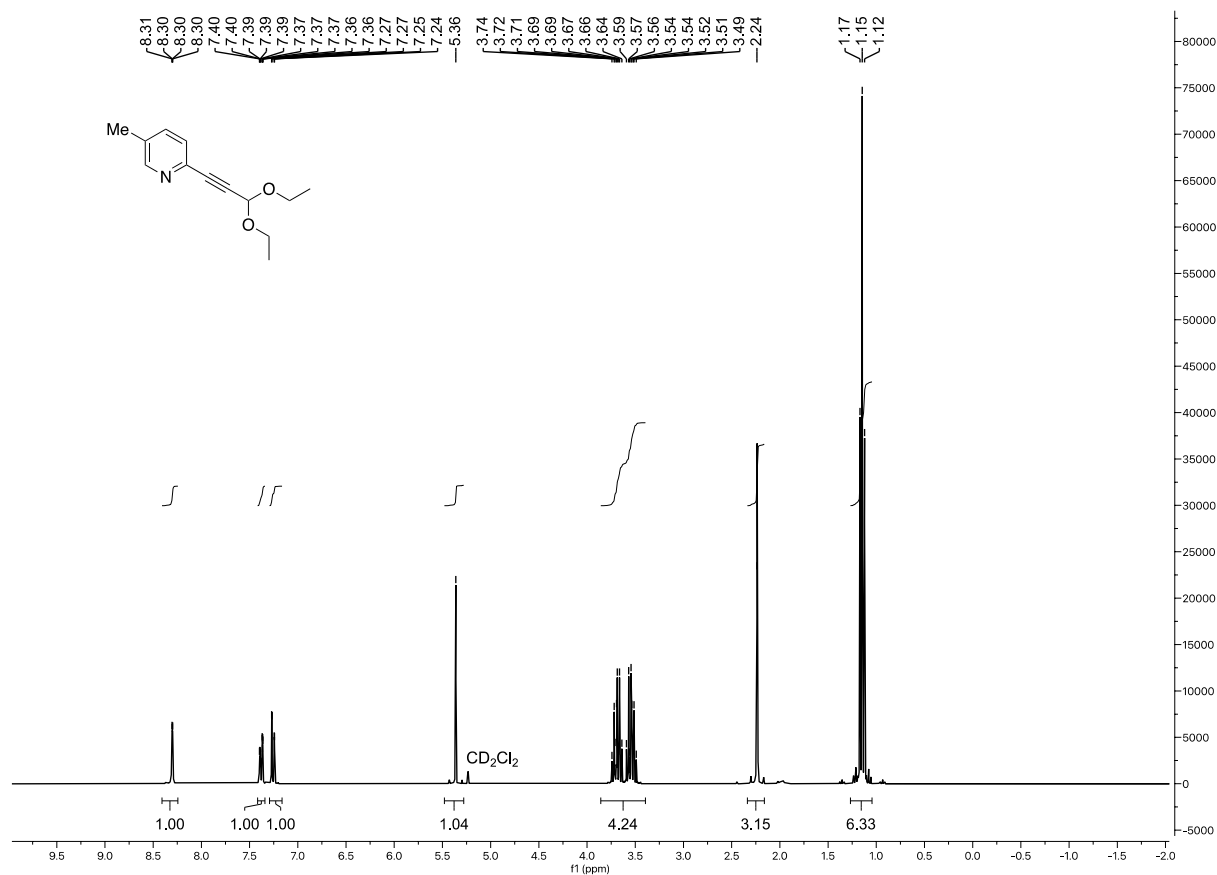

Figure S14. <sup>1</sup>H NMR spectrum of 5-methyl-2-(3,3-diethoxyprop-1-yn-1-yl)pyridine (**2g**).

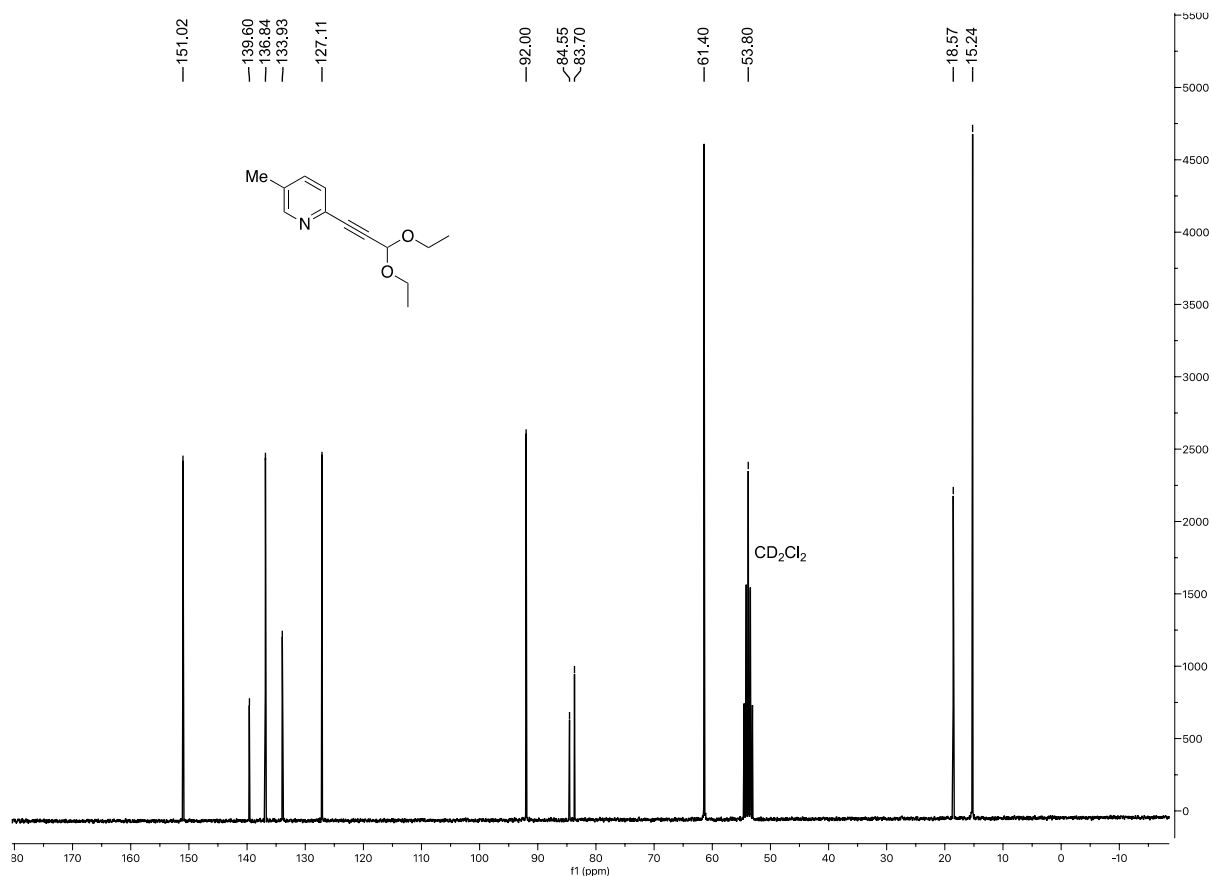

Figure S15. <sup>13</sup>C NMR spectrum of 5-methyl-2-(3,3-diethoxyprop-1-yn-1-yl)pyridine (2g).

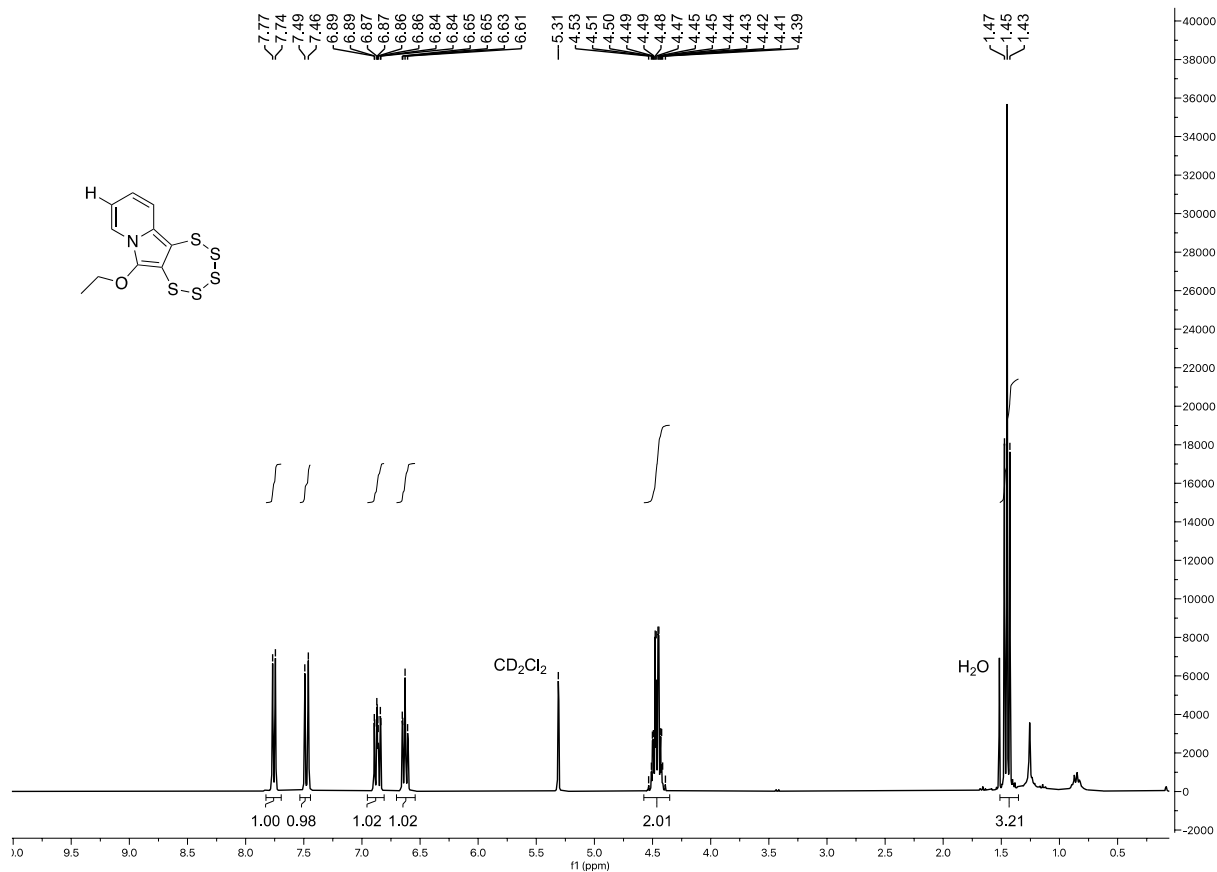

Figure S16. <sup>1</sup>H NMR spectrum of 6-ethoxy-[1,2,3,4,5]pentathiepine[6,7-a]indolizine (3a).

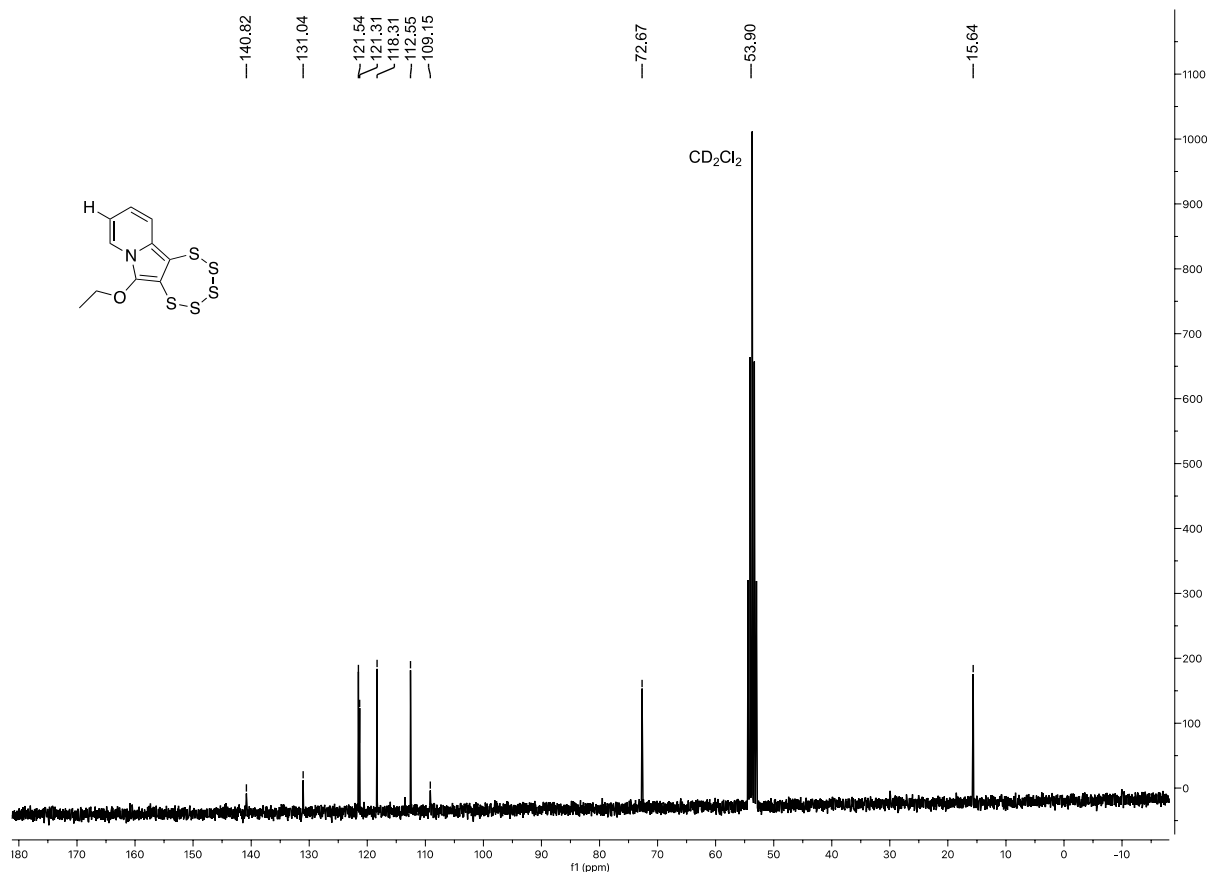

Figure S17. <sup>13</sup>C NMR spectrum of 6-ethoxy-[1,2,3,4,5]pentathiepine[6,7-a]indolizine (3a).

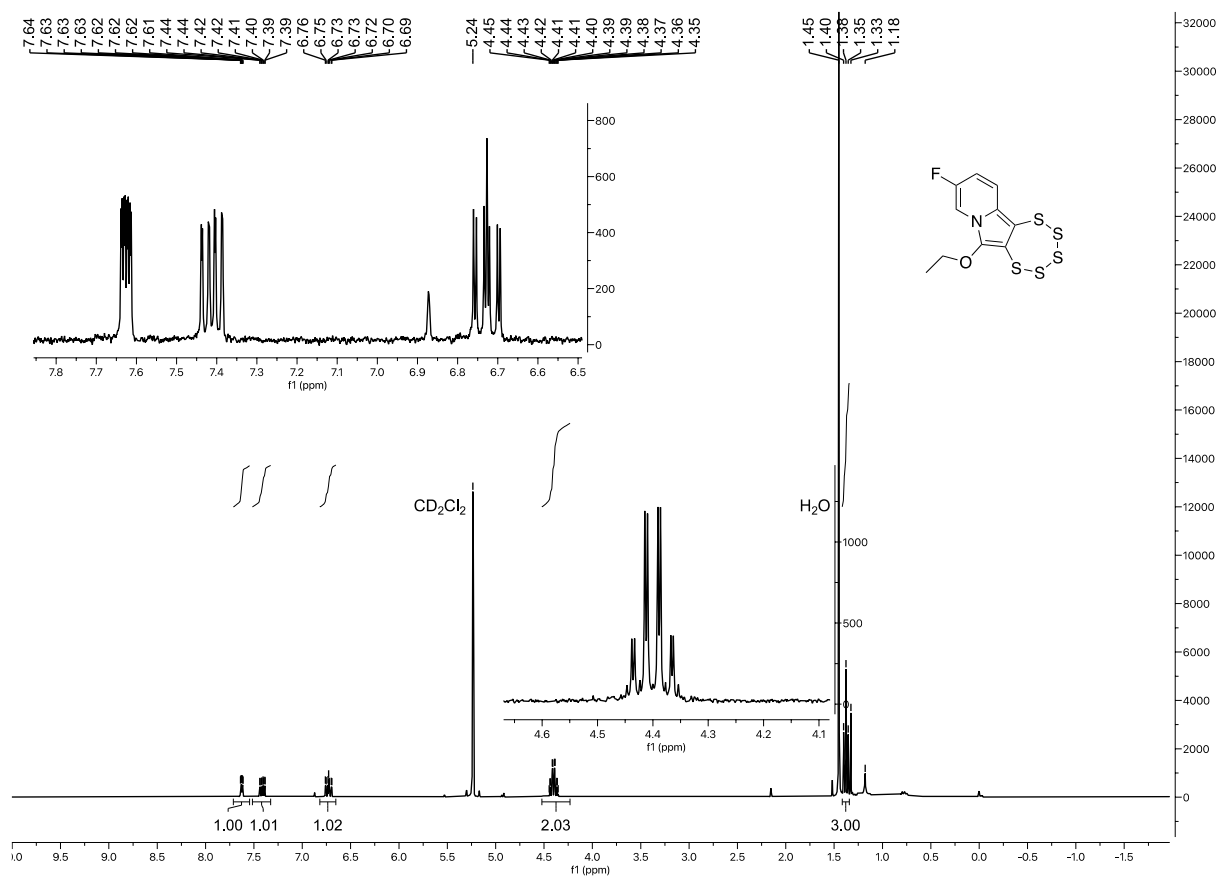

**Figure S18.**  $^1\text{H}$  NMR spectrum of 6-ethoxy-9-fluoro-[1,2,3,4,5]pentathiepine[6,7-a]indolizine with zoom on signals (3b).

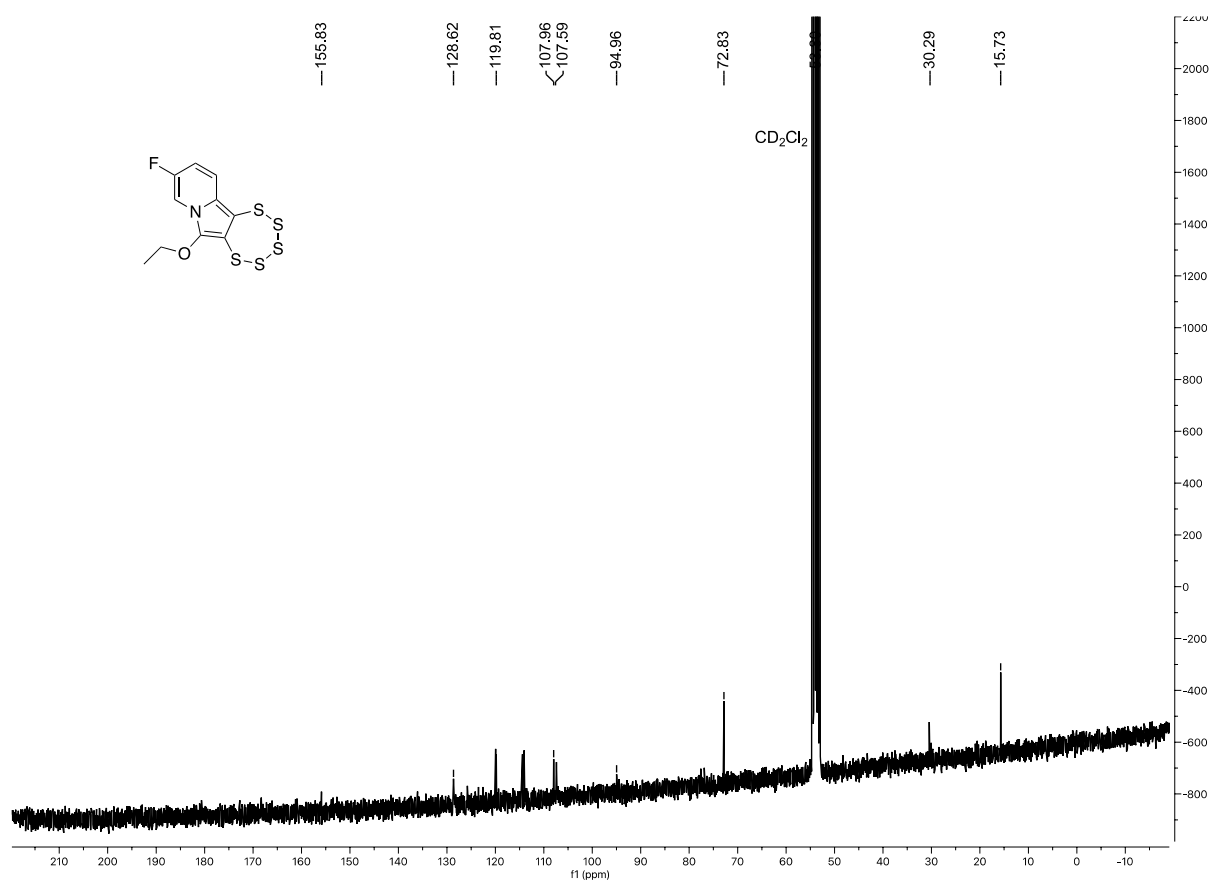

**Figure S19.**  $^{13}\text{C}$  NMR spectrum of 6-ethoxy-9-fluoro-[1,2,3,4,5]pentathiepine[6,7-a]indolizine (3b). The baseline drift is due to the essential zooming for peak observation, consequence of a diluted sample, caused by the low reaction yield.

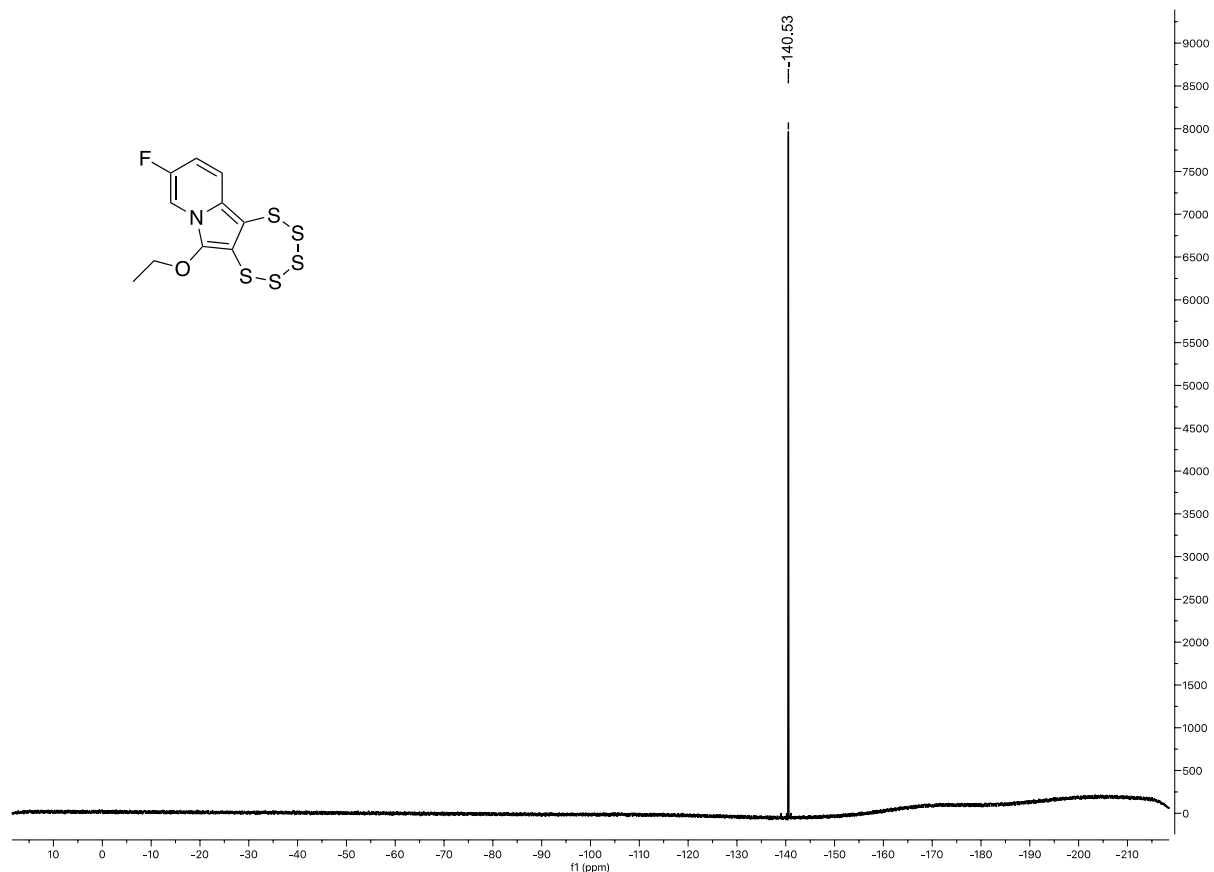

Figure S20. <sup>19</sup>F NMR spectrum of 6-ethoxy-9-fluoro-[1,2,3,4,5]pentathiepine[6,7-a]indolizine (3b).

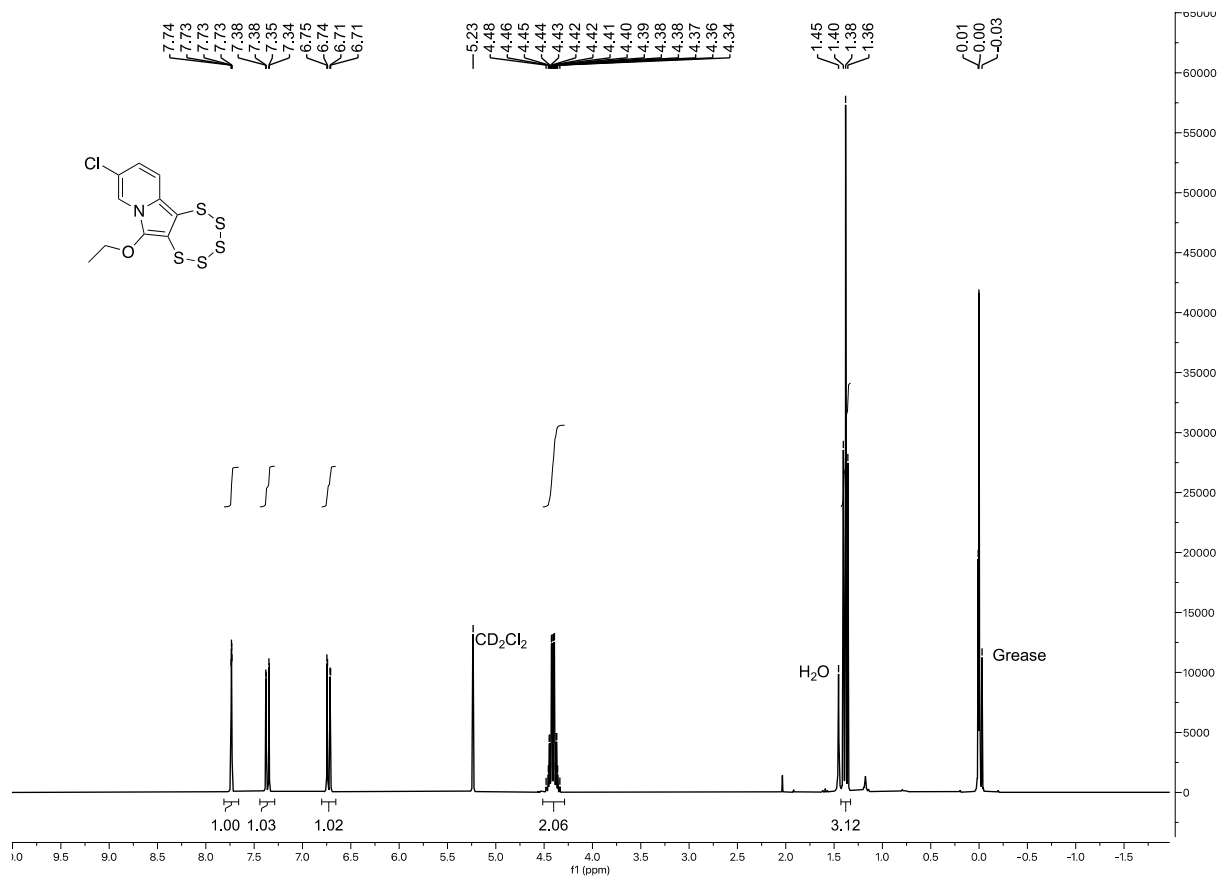

Figure S21. <sup>1</sup>H NMR spectrum 6-ethoxy-9-chloro-[1,2,3,4,5]pentathiepine[6,7-a]indolizine (3c).

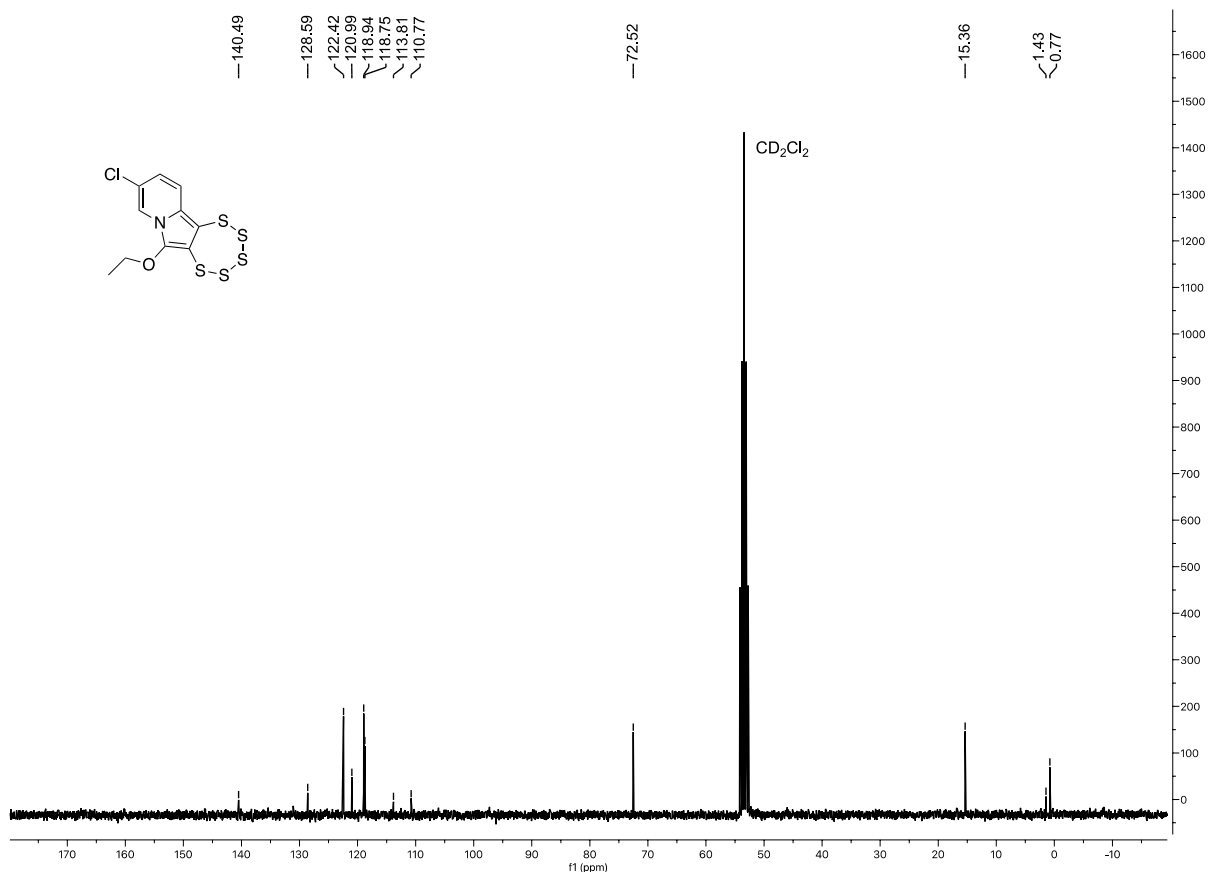

Figure S22. <sup>13</sup>C NMR spectrum 6-ethoxy-9-chloro-[1,2,3,4,5]pentathiepine[6,7-a]indolizine (3c).

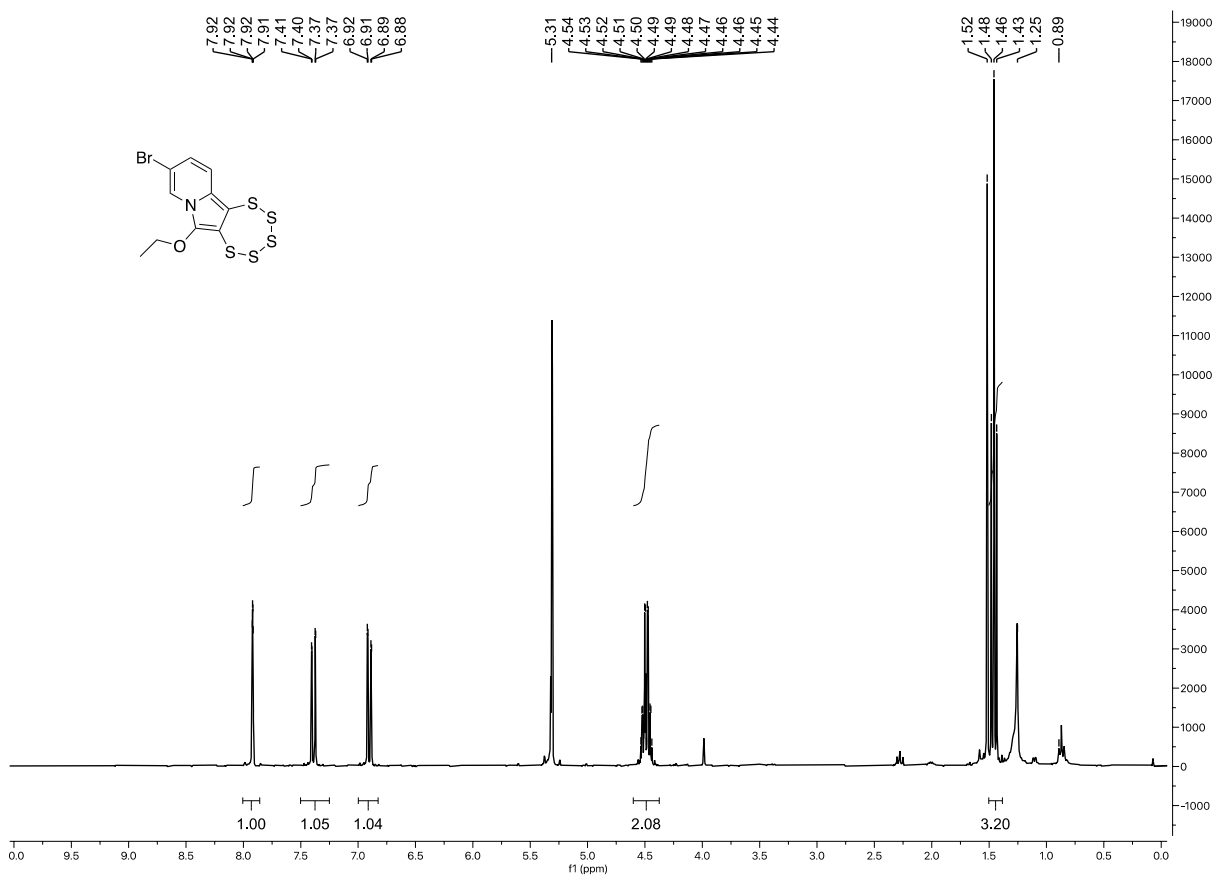

Figure S23. <sup>1</sup>H NMR spectrum of 6-ethoxy-9-bromo-[1,2,3,4,5]pentathiepine[6,7-a]indolizine (3d).

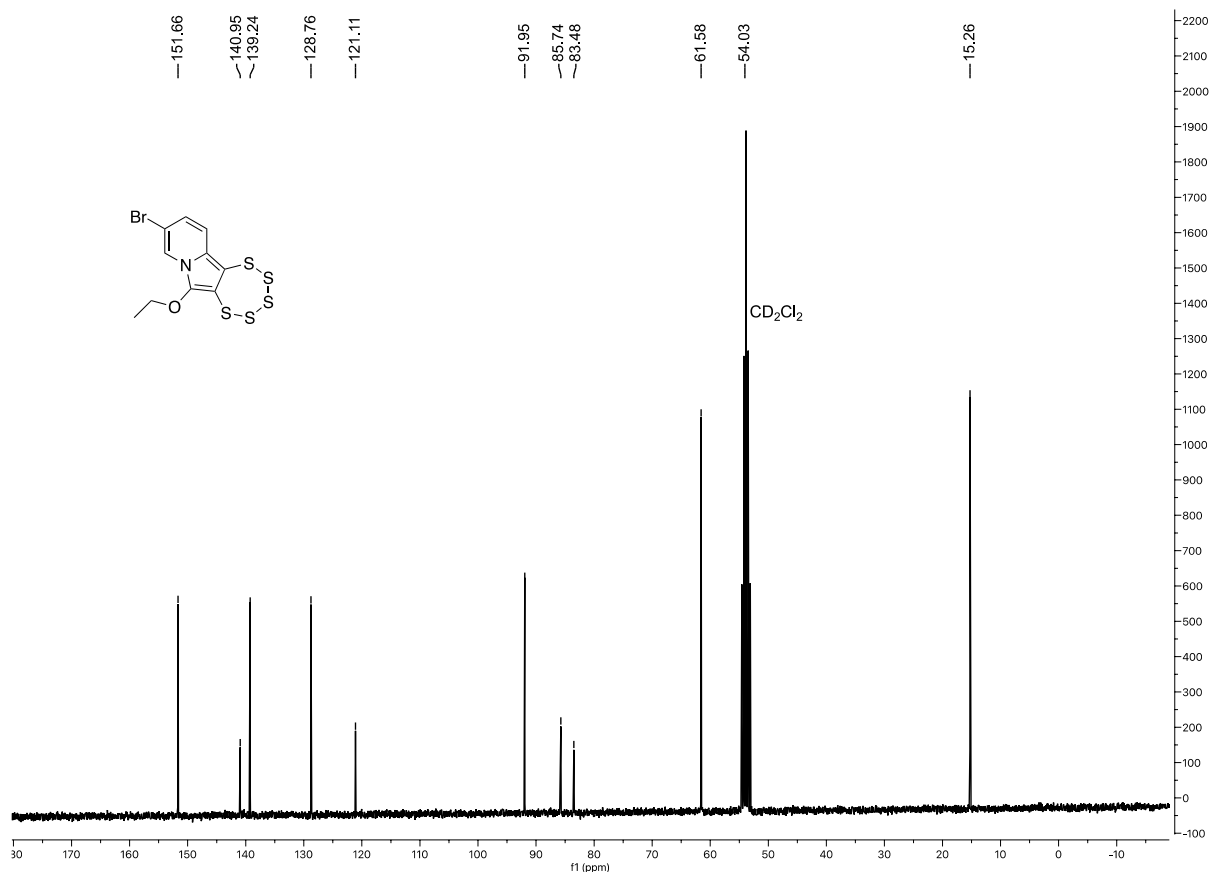

Figure S24. <sup>13</sup>C NMR spectrum of 6-ethoxy-9-bromo-[1,2,3,4,5]pentathiepi[6,7-a]indolizine (3d).

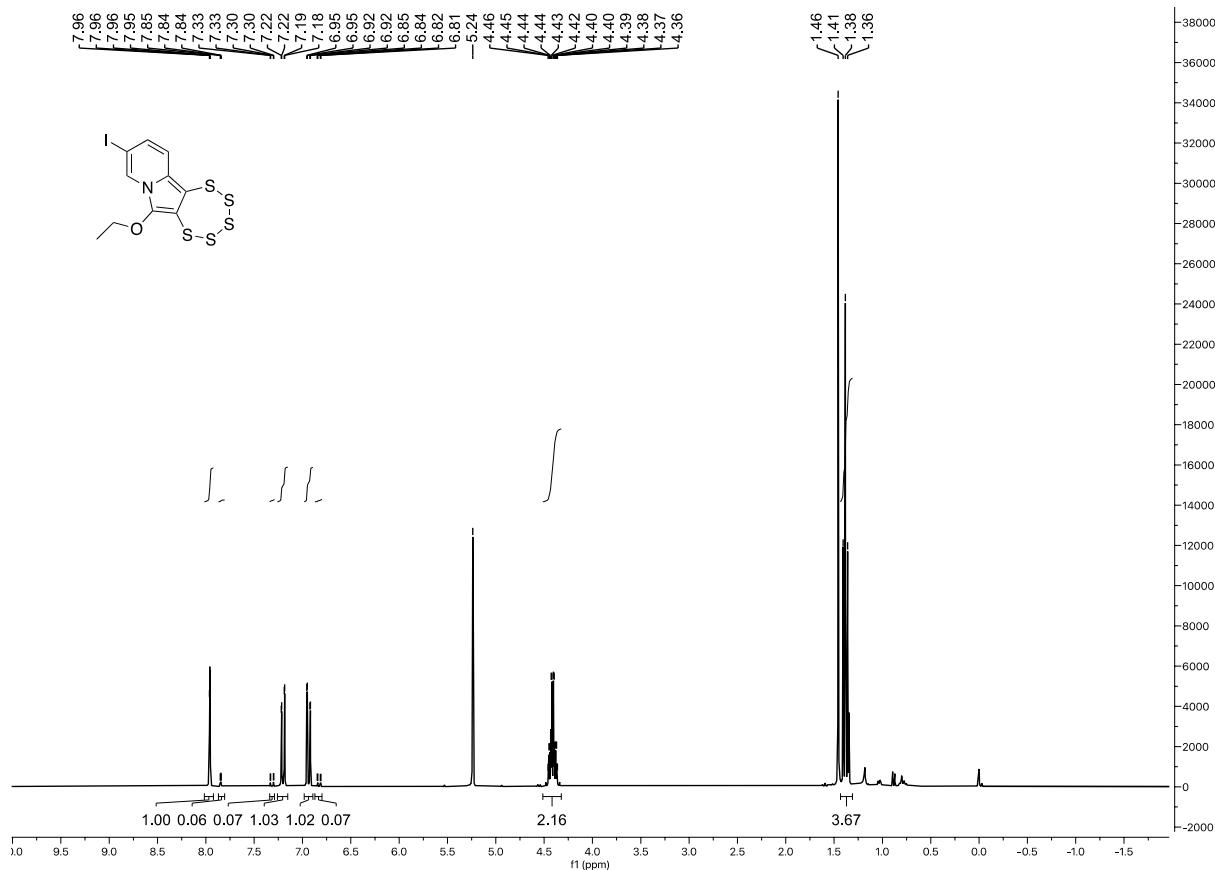

Figure S25. <sup>1</sup>H NMR spectrum of 6-ethoxy-9-iodo-[1,2,3,4,5]pentathiepi[6,7-a]indolizine (3e).

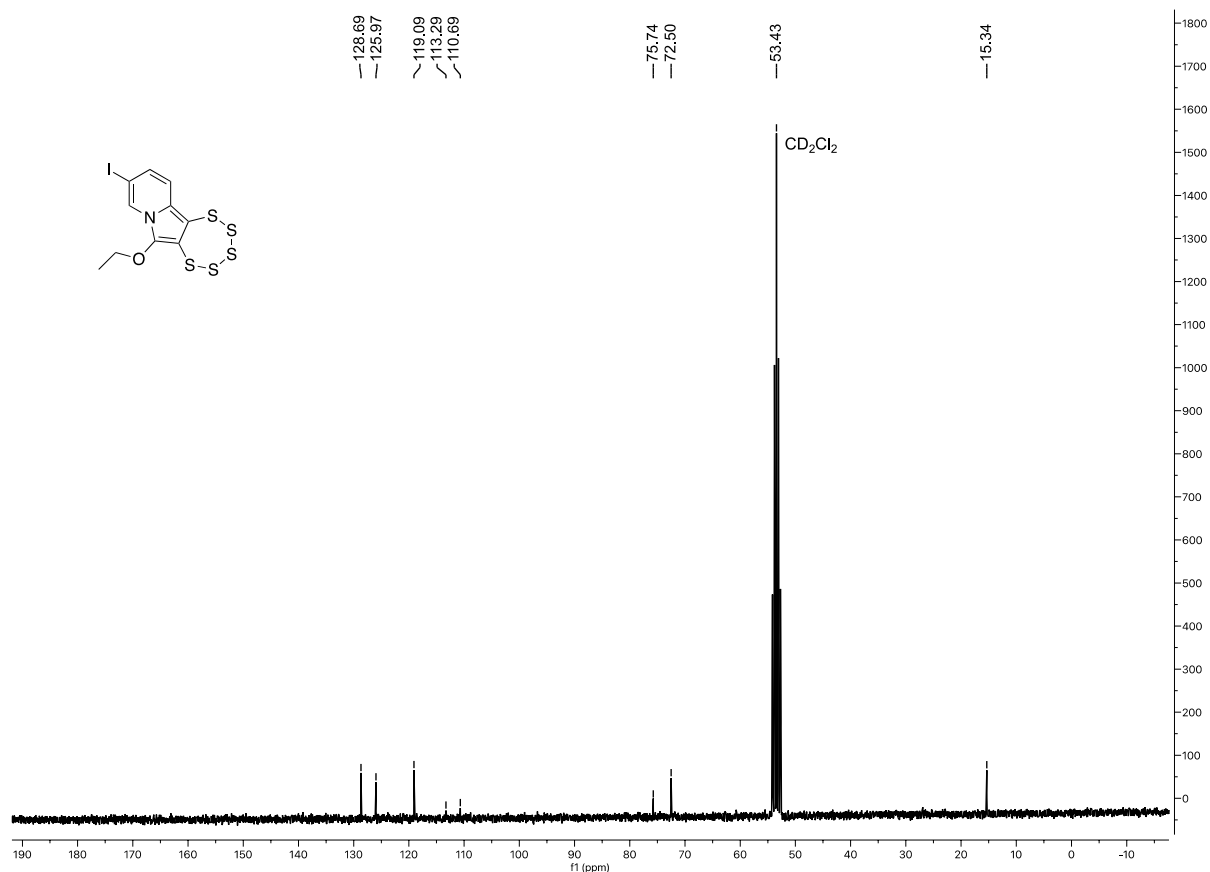

Figure S26. <sup>13</sup>C NMR spectrum of 6-ethoxy-9-iodo-[1,2,3,4,5]pentathiepine[6,7-a]indolizine (3e).

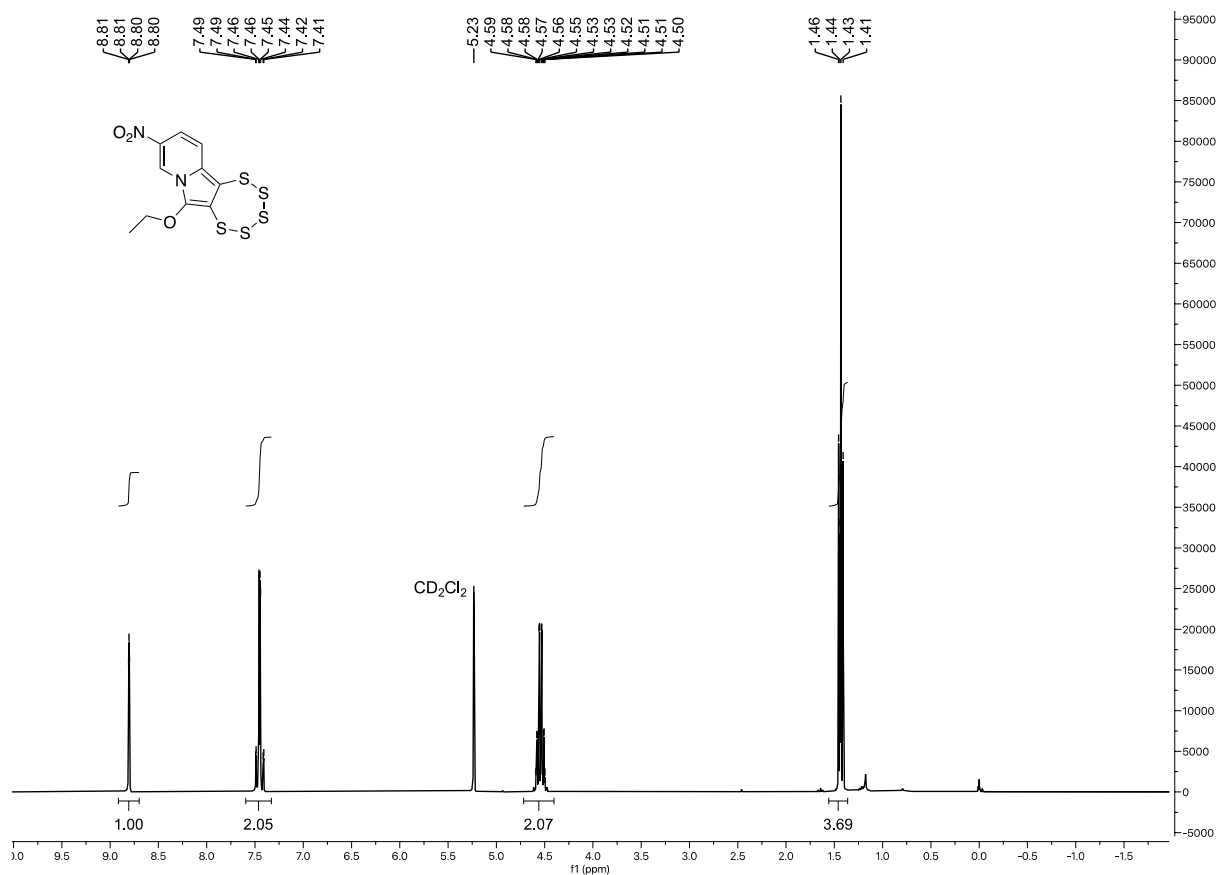

Figure S27. <sup>1</sup>H NMR spectrum of 6-ethoxy-9-nitro-[1,2,3,4,5]pentathiepine[6,7-a]indolizine (3f).

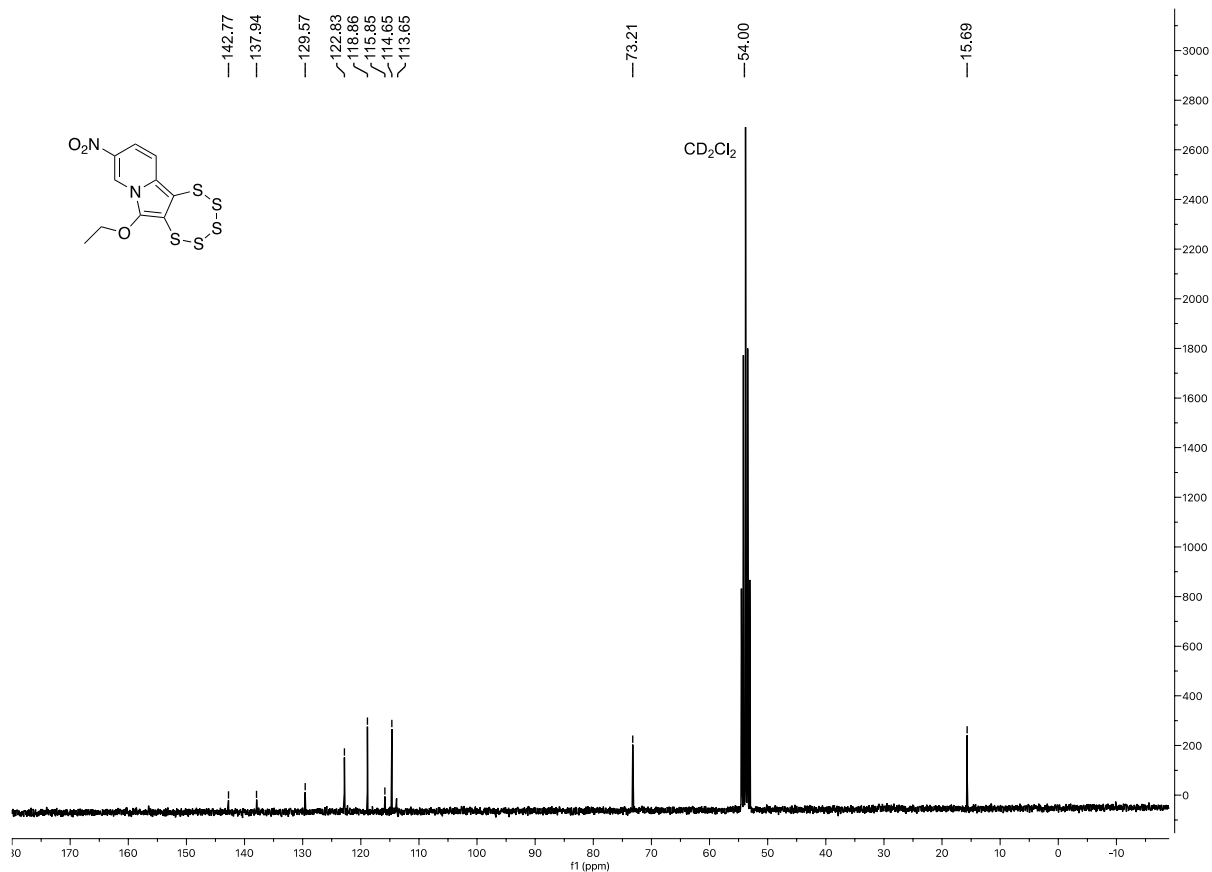

Figure S28. <sup>13</sup>C NMR spectrum of 6-ethoxy-9-nitro-[1,2,3,4,5]pentathiepine[6,7-a]indolizine (3f).

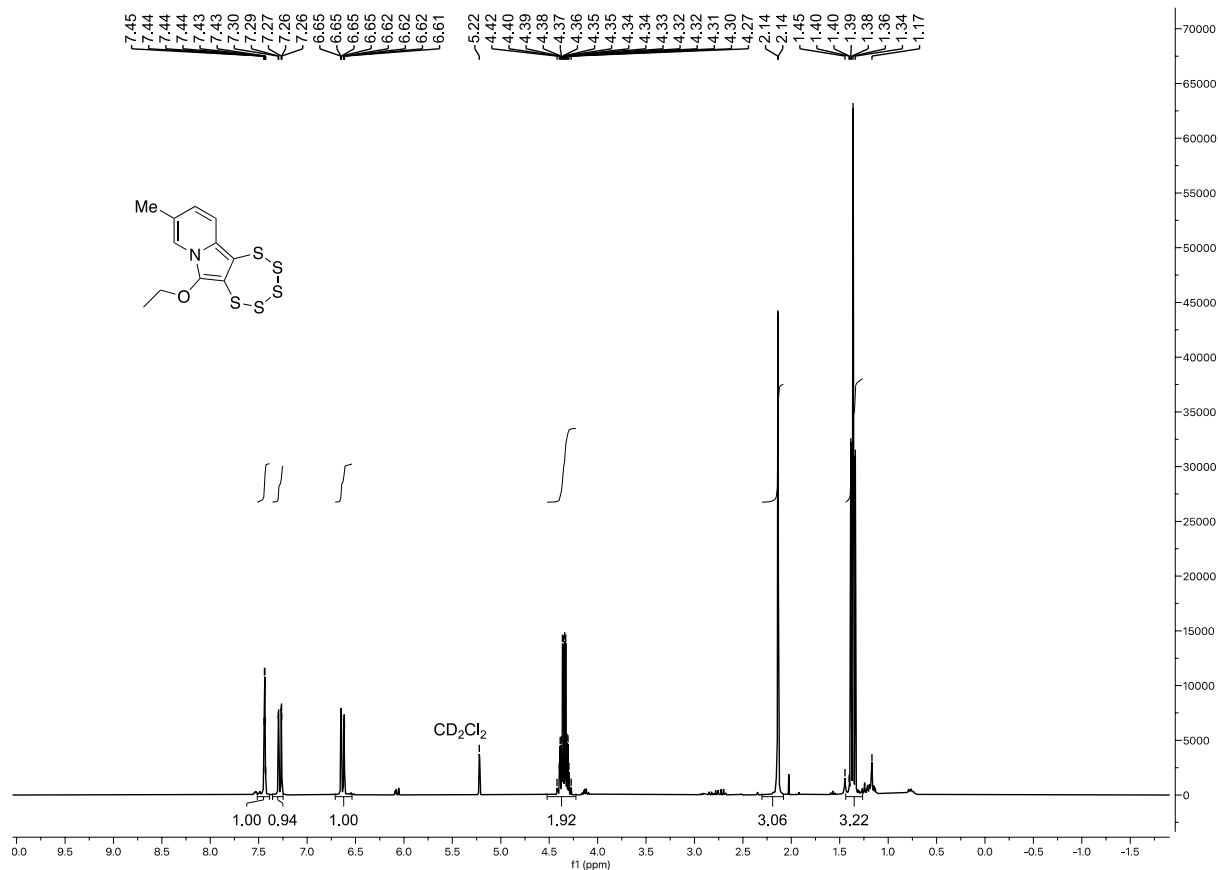

Figure S29. <sup>1</sup>H NMR spectrum of 6-ethoxy-9-methyl-[1,2,3,4,5]pentathiepine[6,7-a]indolizine (3g).

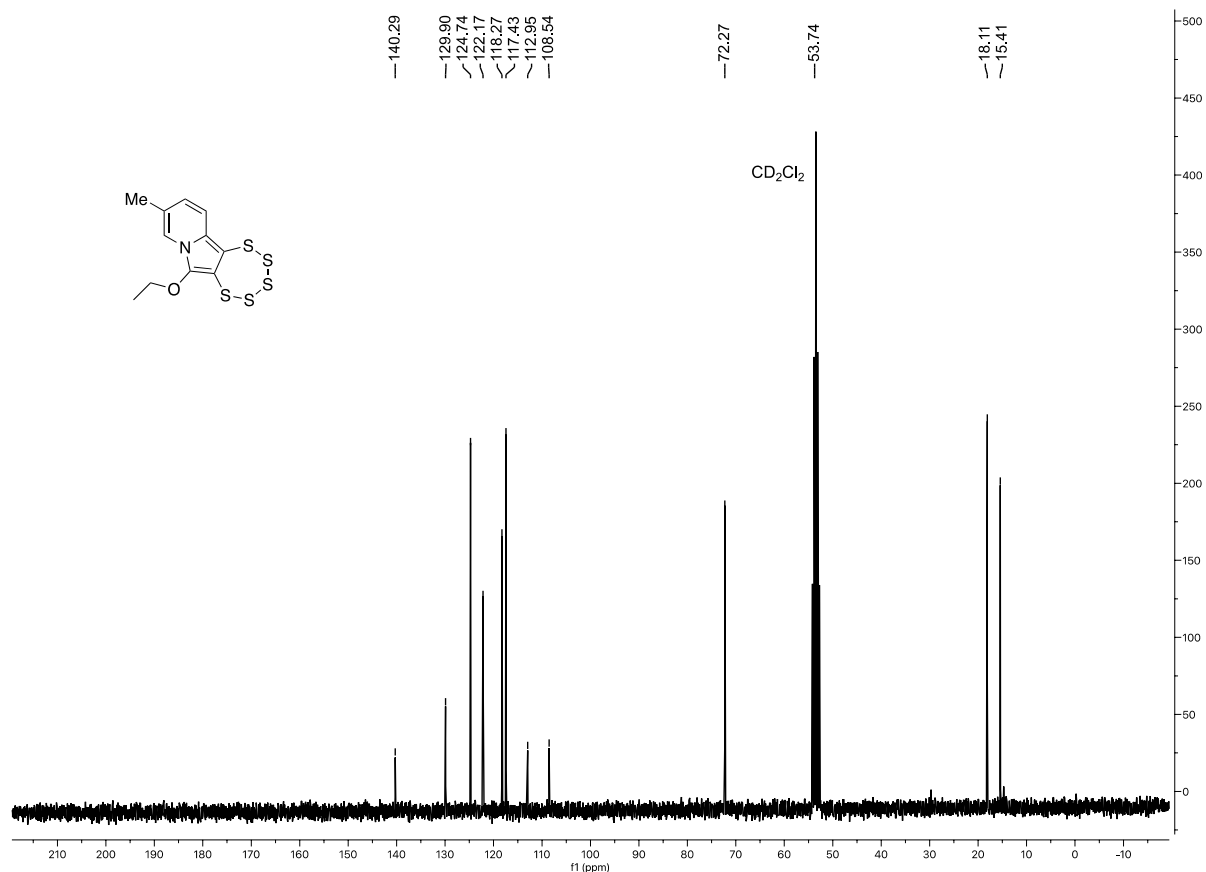

**Figure S30.** <sup>13</sup>C NMR spectrum of 6-ethoxy-9-methyl-[1,2,3,4,5]pentathiepine[6,7-a]indolizine (3g).

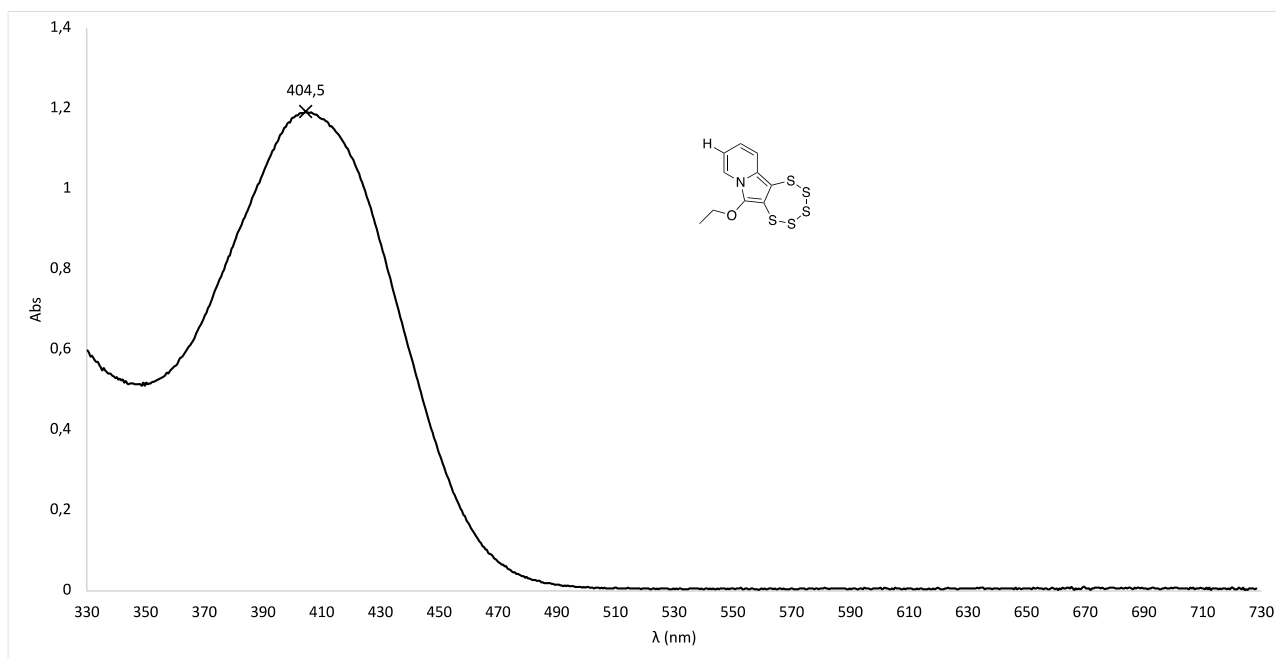

**Figure S31.** UV-Vis spectrum of 6-ethoxy-[1,2,3,4,5]pentathiepine[6,7-a]indolizine (3a).

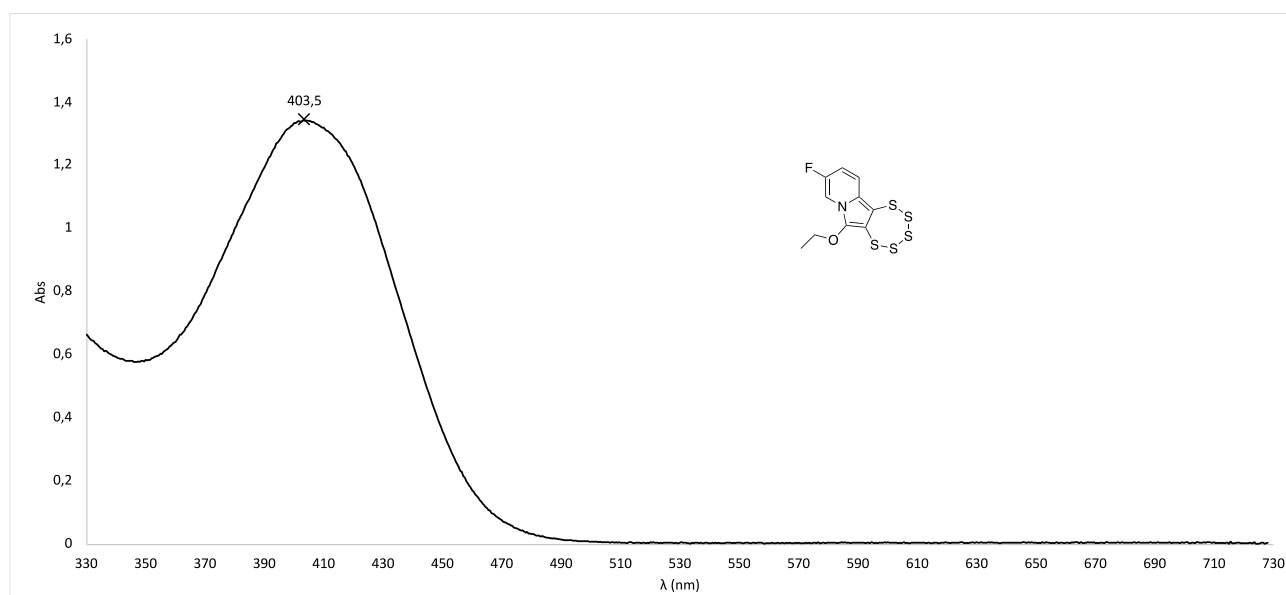

**Figure S32.** UV-Vis spectrum of 6-ethoxy-9-fluoro-[1,2,3,4,5]pentathiepino[6,7-a]indolizine (**3b**).

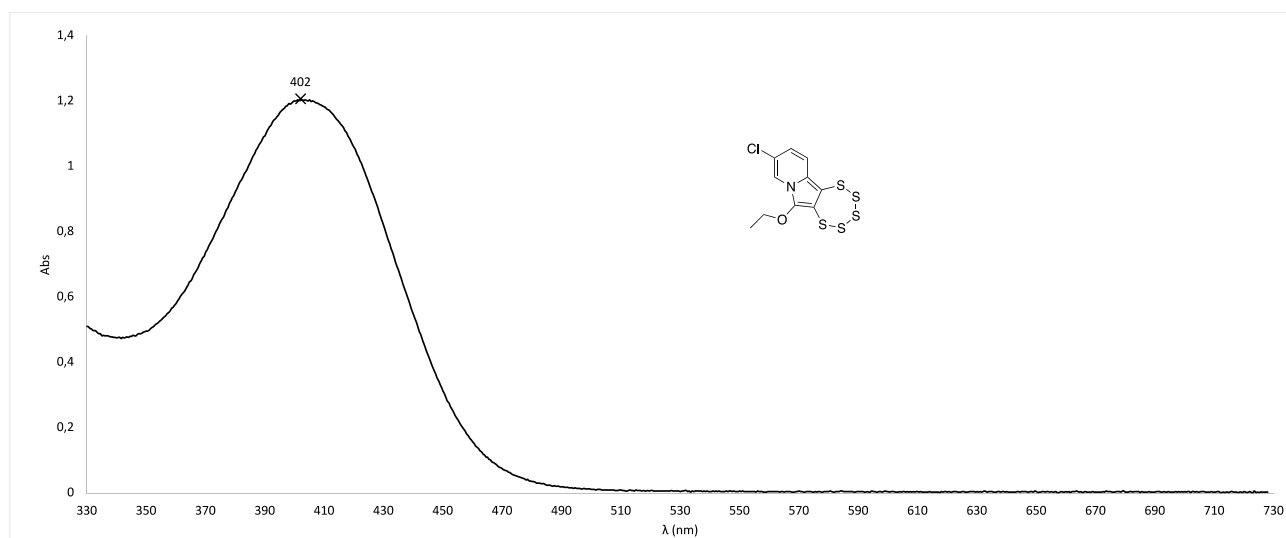

**Figure S33.** UV-Vis spectrum of 6-ethoxy-9-chloro-[1,2,3,4,5]pentathiepino[6,7-a]indolizine (**3c**).

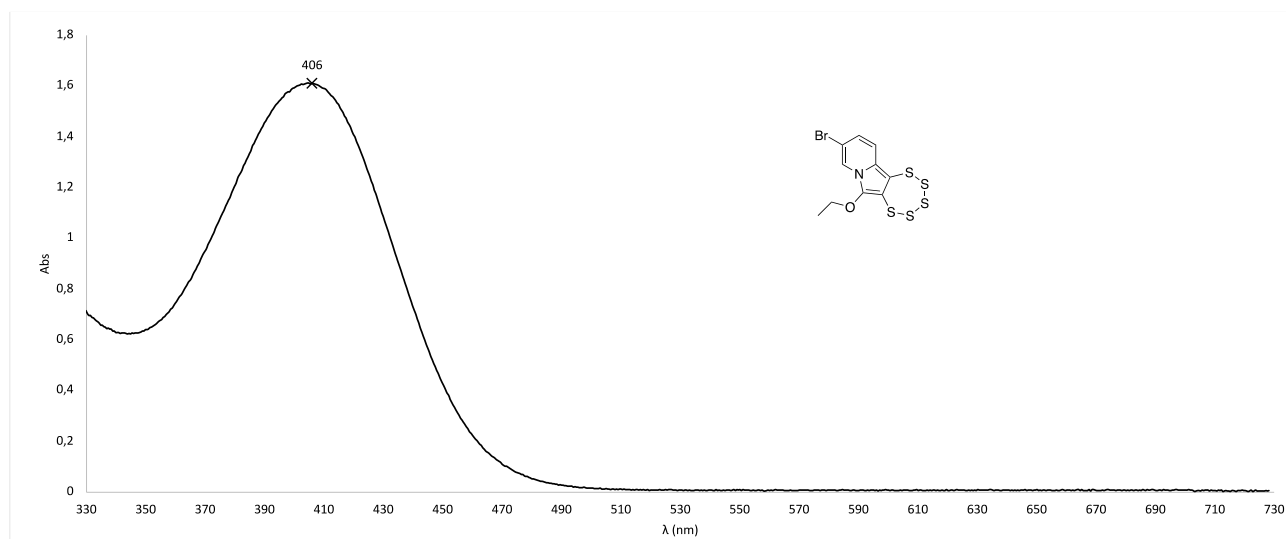

**Figure S34.** UV-Vis spectrum of 6-ethoxy-9-bromo-[1,2,3,4,5]pentathiepino[6,7-a]indolizine (**3d**).

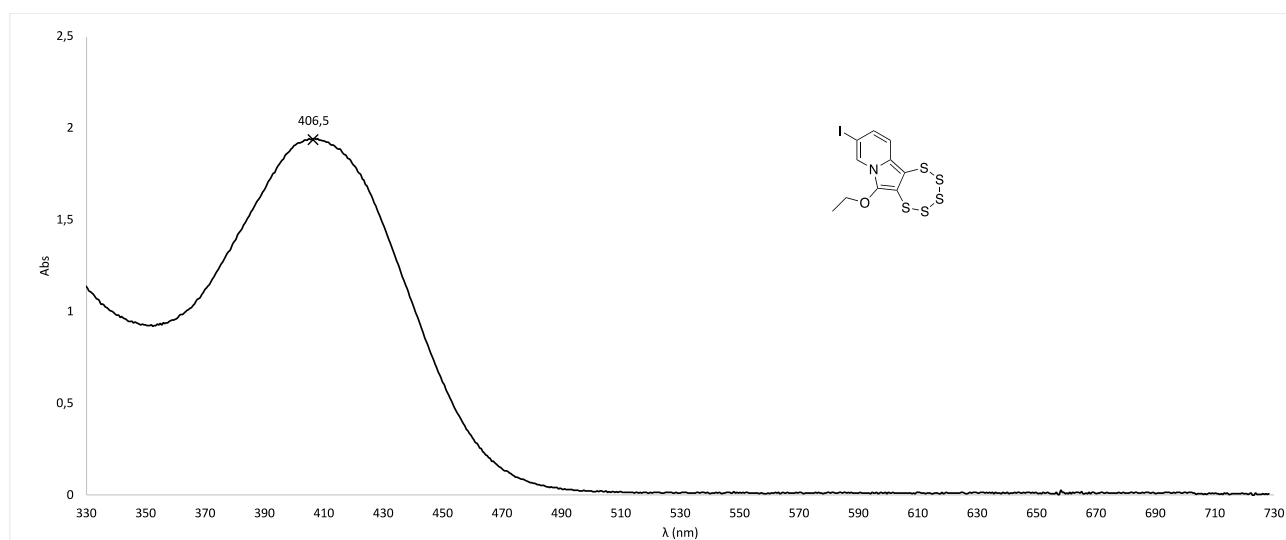

**Figure S35.** UV-Vis spectrum of 6-ethoxy-9-iodo-[1,2,3,4,5]pentathiepine[6,7-a]indolizine (**3e**).

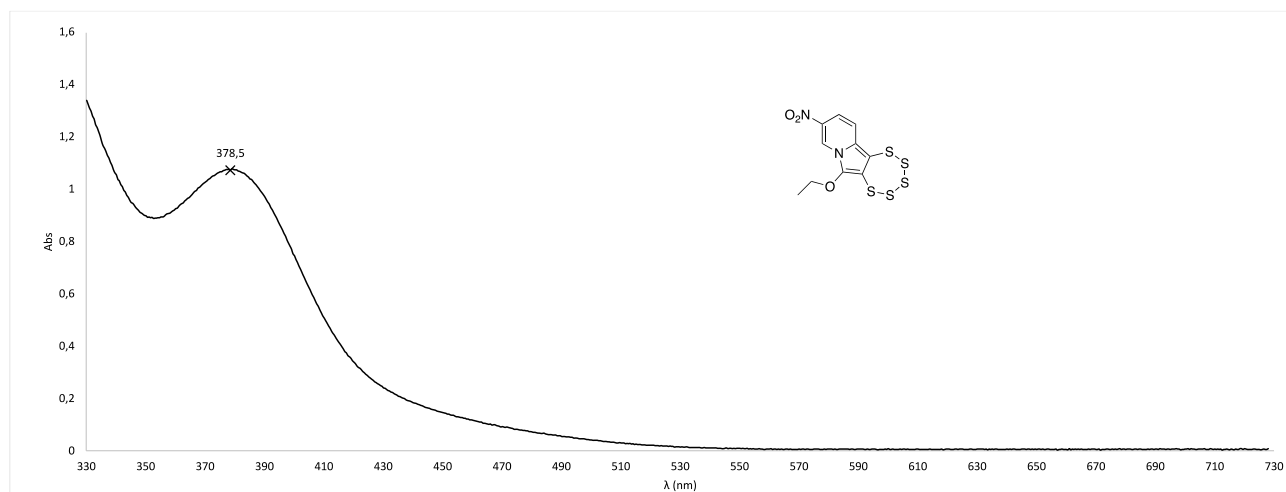

**Figure S36.** UV-Vis spectrum of 6-ethoxy-9-nitro-[1,2,3,4,5]pentathiepine[6,7-a]indolizine (**3f**).

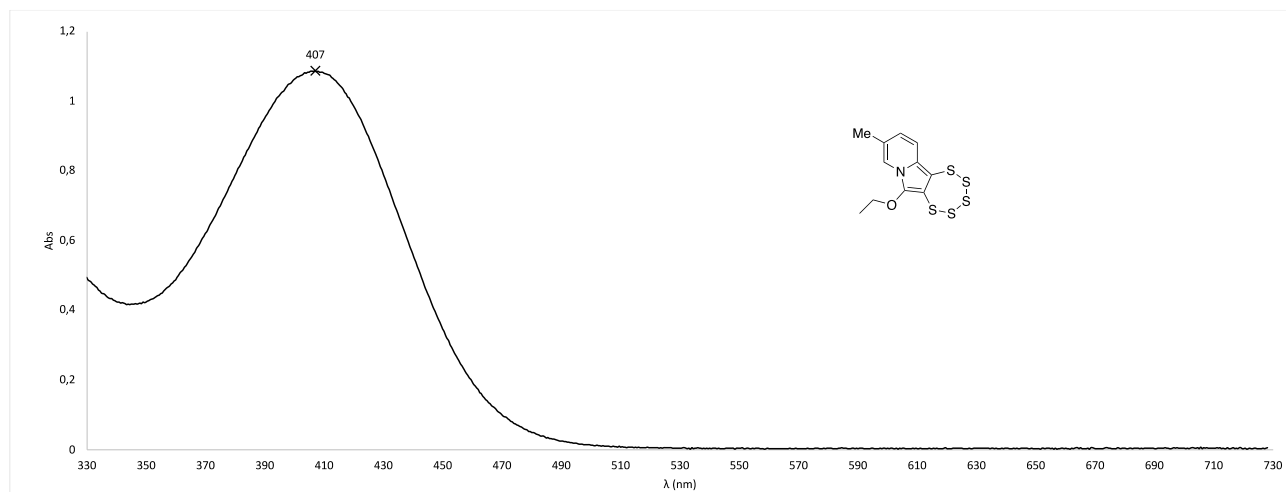

**Figure S37.** UV-Vis spectrum of 6-ethoxy-9-methyl-[1,2,3,4,5]pentathiepine[6,7-a]indolizine (**3g**).

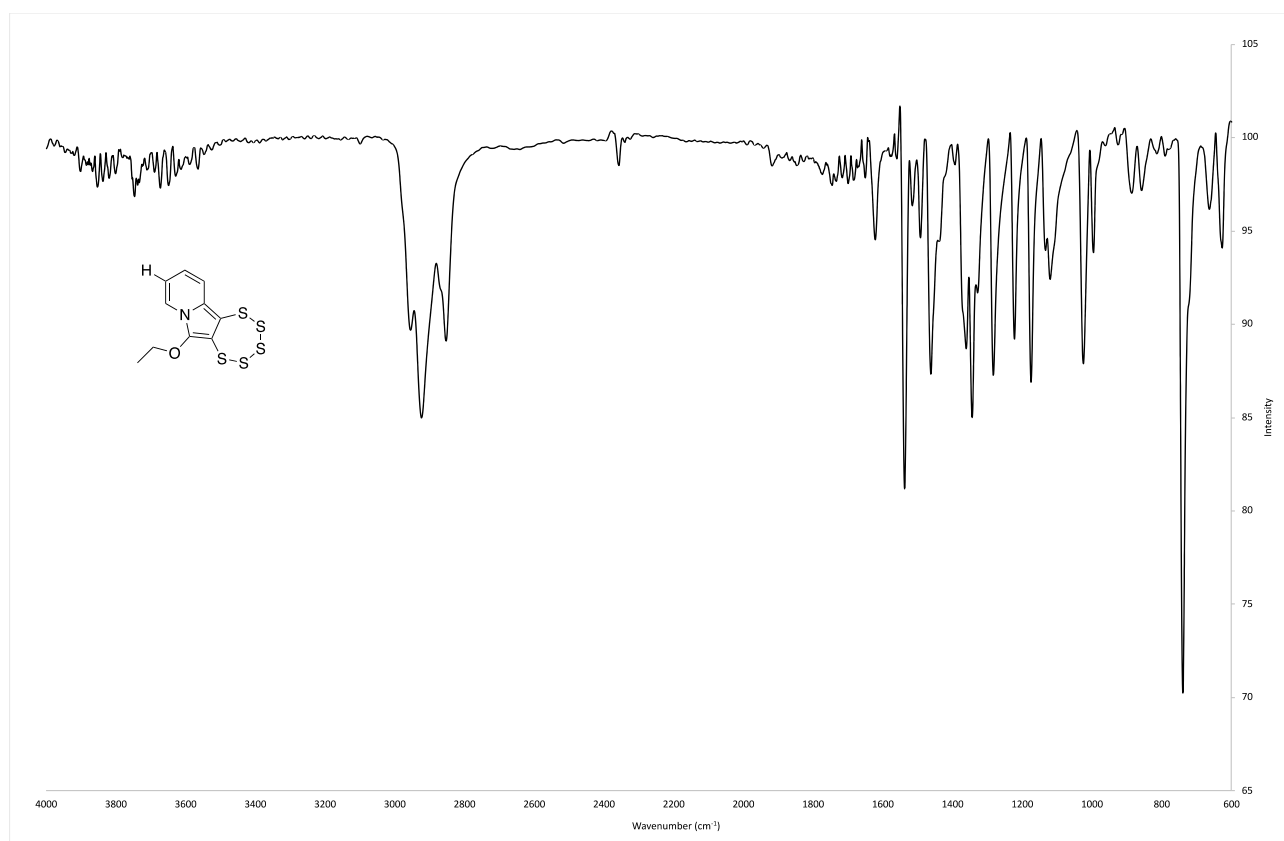

**Figure S38.** IR spectrum of 6-ethoxy-[1,2,3,4,5]pentathiepine[6,7-a]indolizine (**3a**).

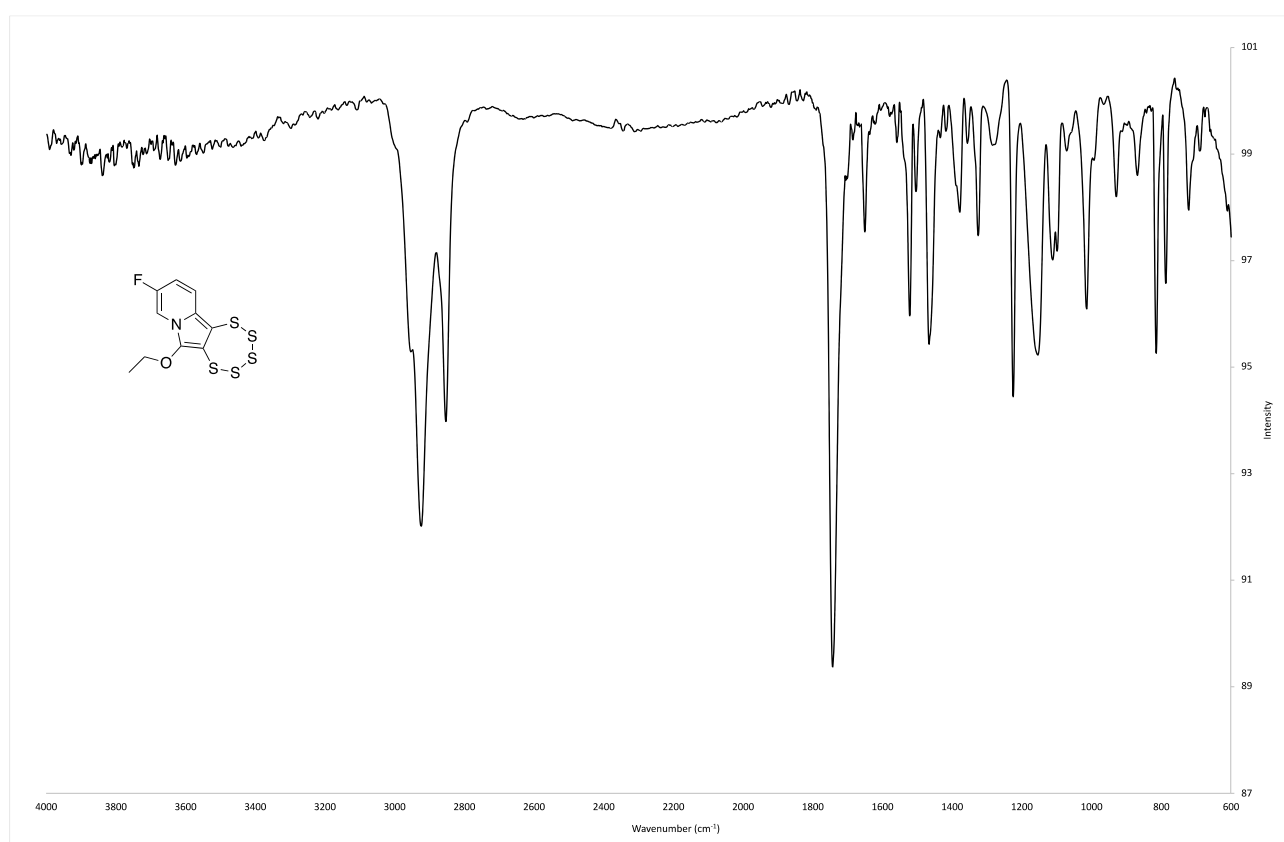

**Figure S39.** IR spectrum of 6-ethoxy-9-fluoro-[1,2,3,4,5]pentathiepine[6,7-a]indolizine (**3b**).

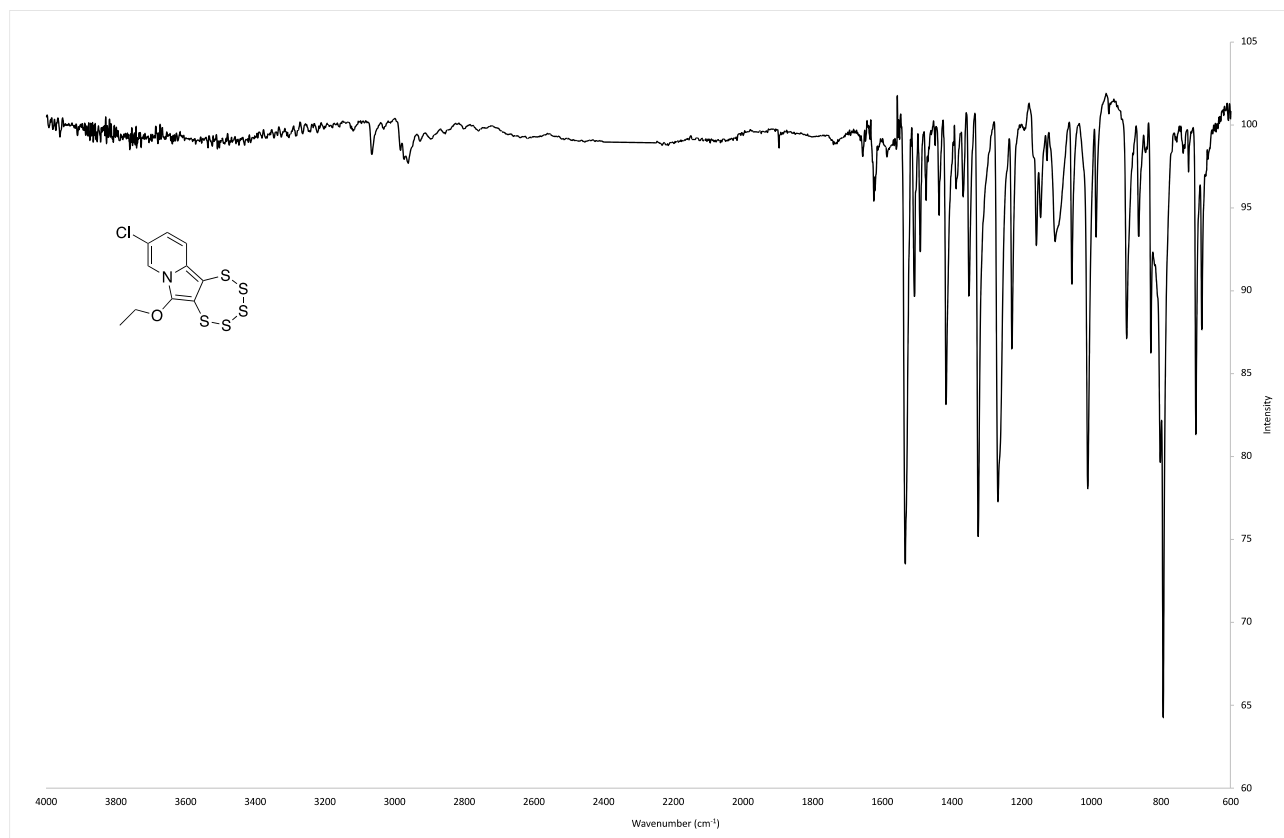

**Figure S40.** IR spectrum of 6-ethoxy-9-chloro-[1,2,3,4,5]pentathiepine[6,7-a]indolizine (**3c**).

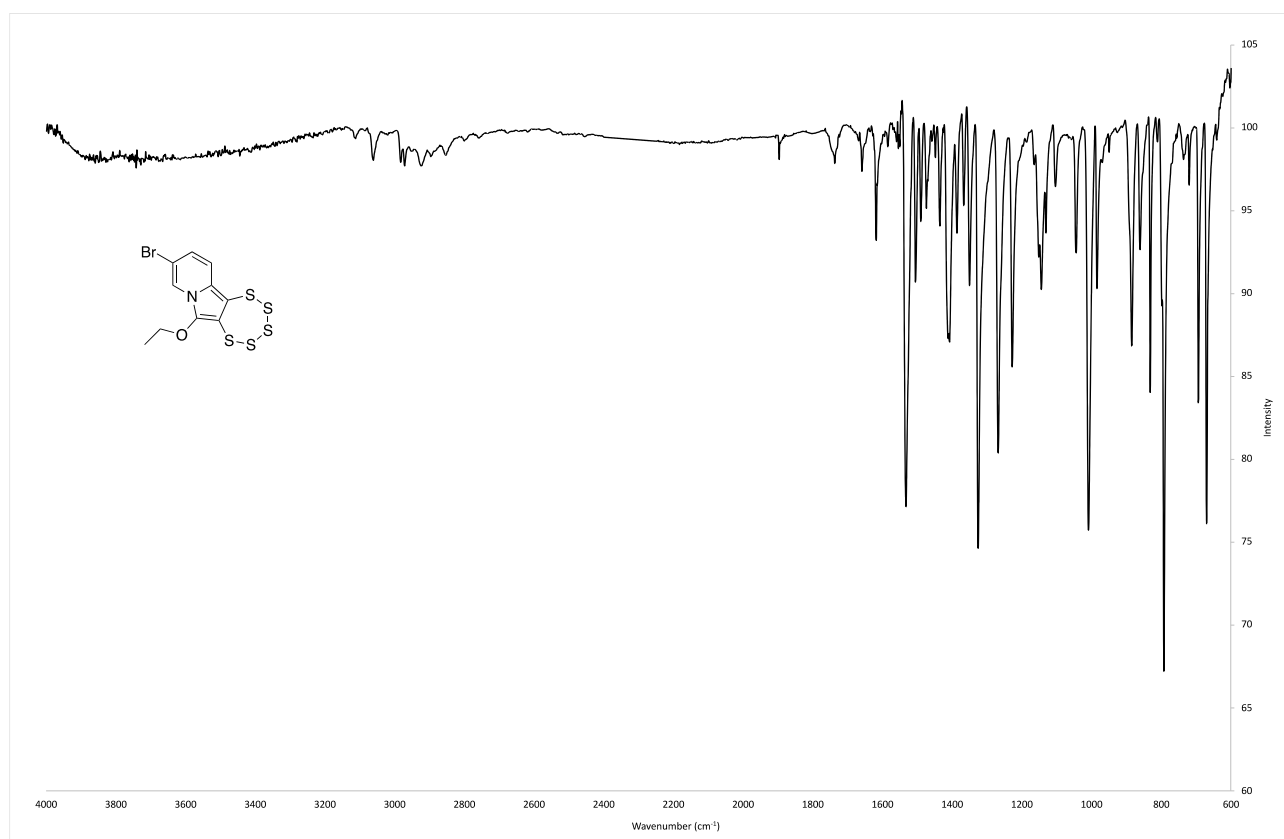

**Figure S41.** IR spectrum of 6-ethoxy-9-bromo-[1,2,3,4,5]pentathiepine[6,7-a]indolizine (**3d**).

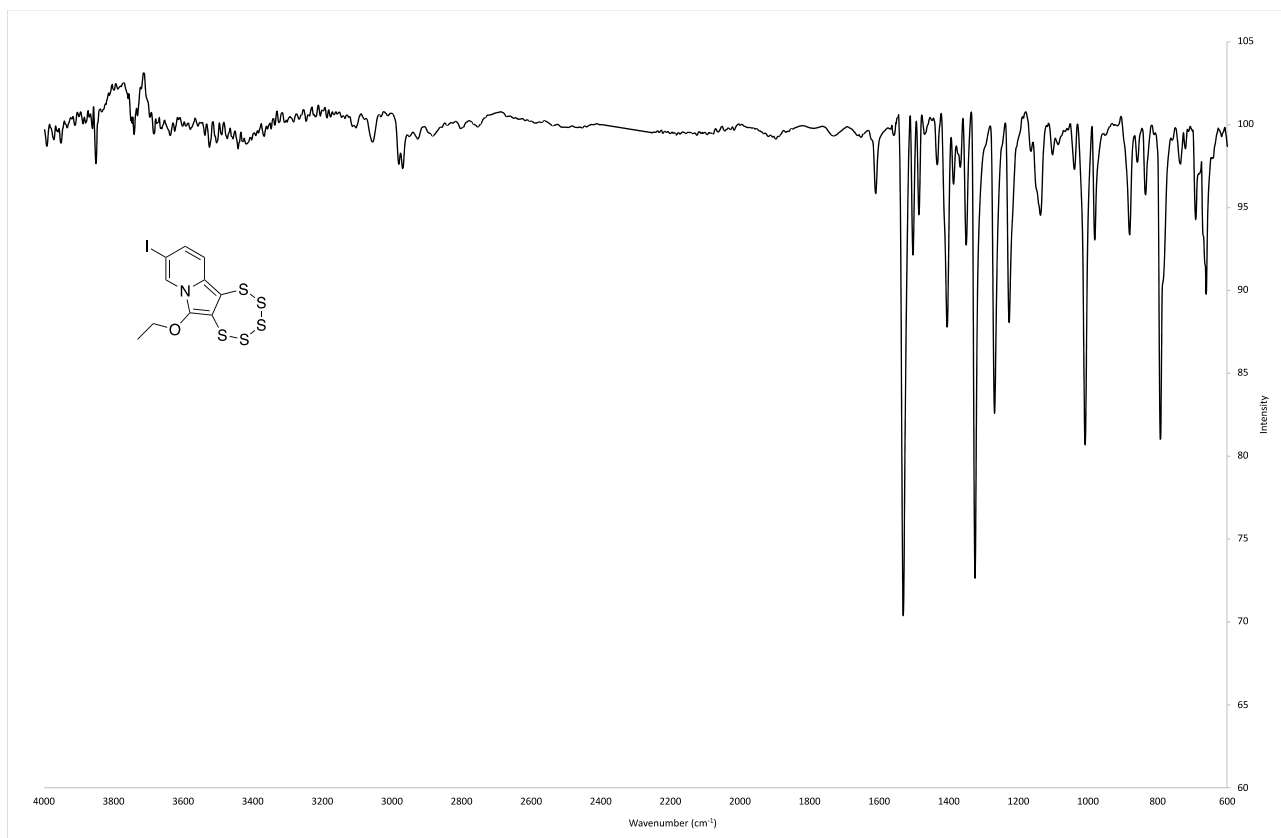

**Figure S42.** IR spectrum of 6-ethoxy-9-iodo-[1,2,3,4,5]pentathiepine[6,7-a]indolizine (**3e**).

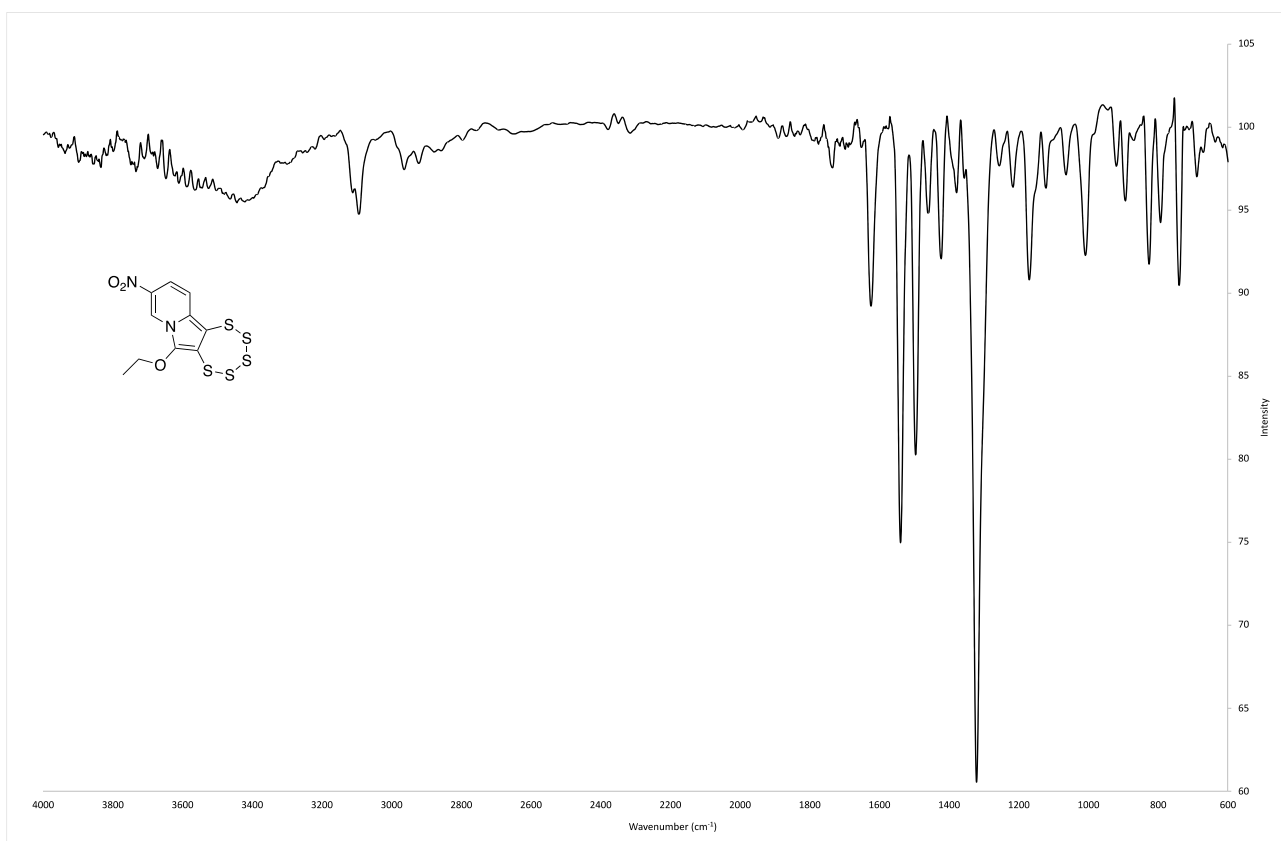

**Figure S43.** IR spectrum of 6-ethoxy-9-nitro-[1,2,3,4,5]pentathiepine[6,7-a]indolizine (**3f**).

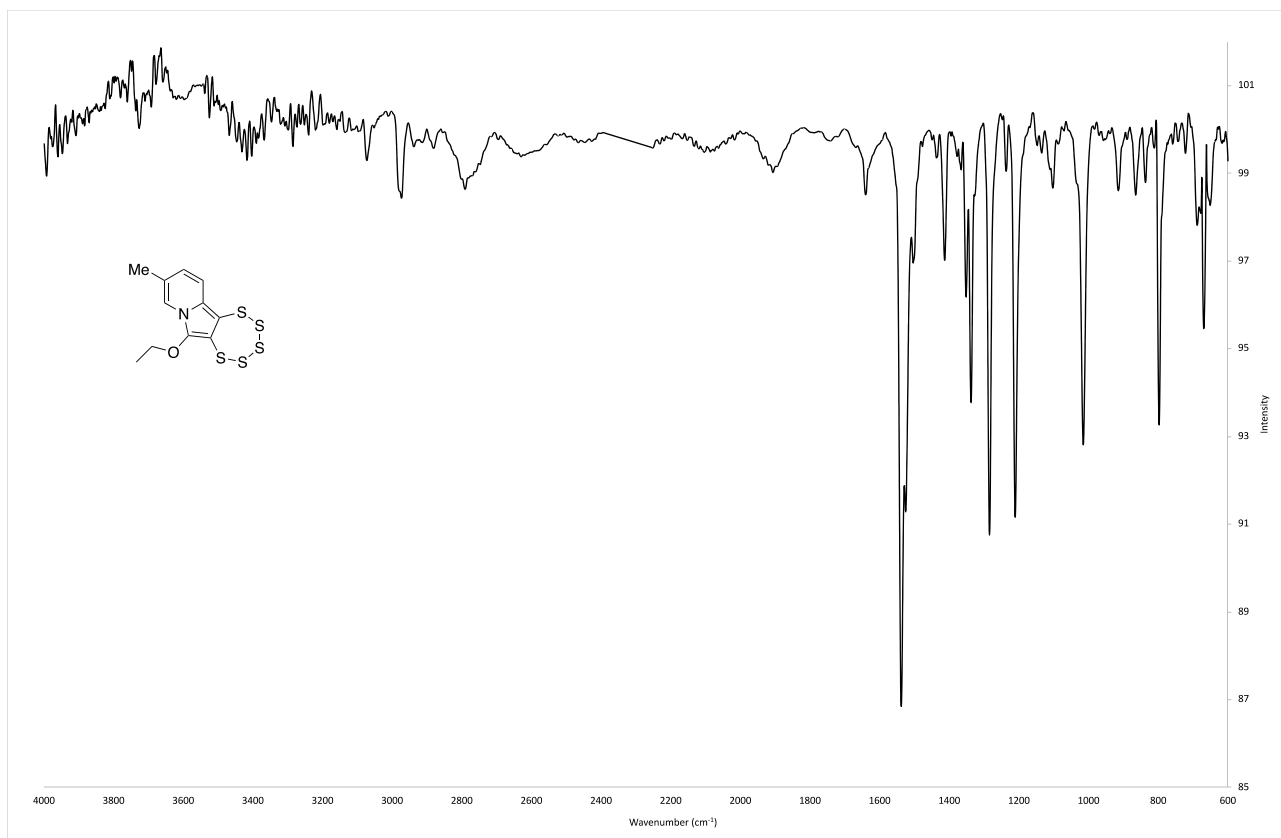

**Figure S44.** IR spectrum of 6-ethoxy-9-methyl-[1,2,3,4,5]pentathiepine[6,7-a]indolizine (**3g**).

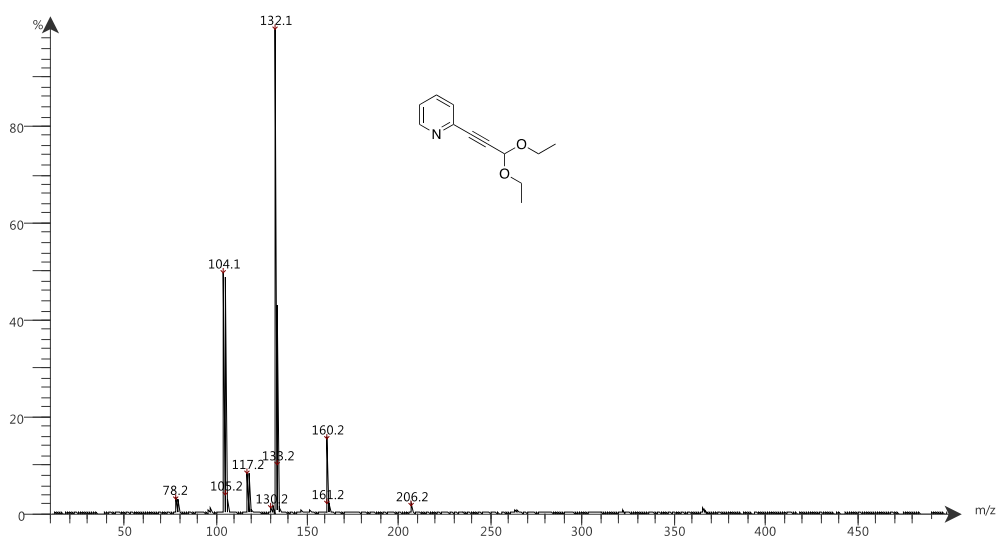

**Figure S45.** APCI Mass spectrum of 2-(3,3-diethoxyprop-1-yn-1-yl)pyridine (**2a**).

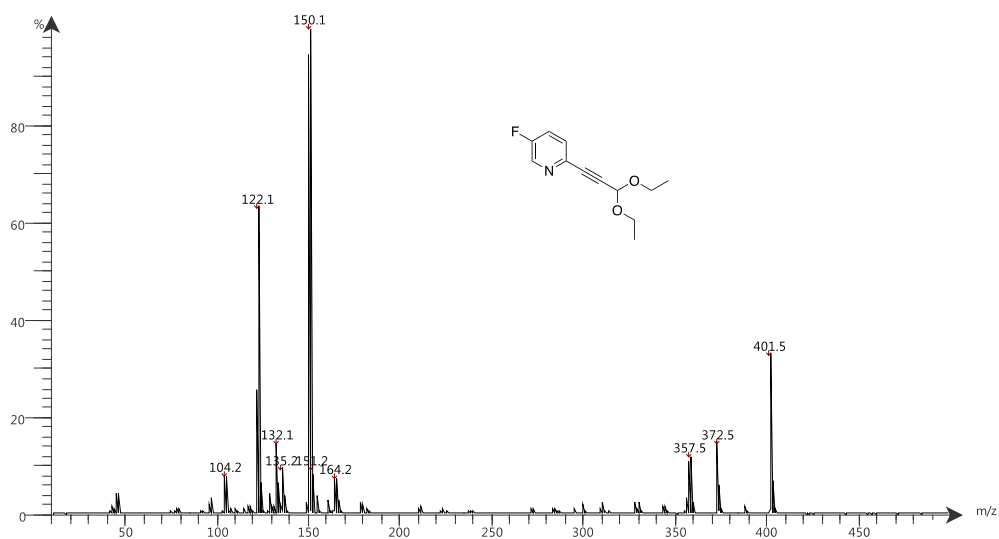

**Figure S46.** APCI Mass spectrum of 5-fluoro-2-(3,3-diethoxyprop-1-yn-1-yl)pyridine (**2b**).

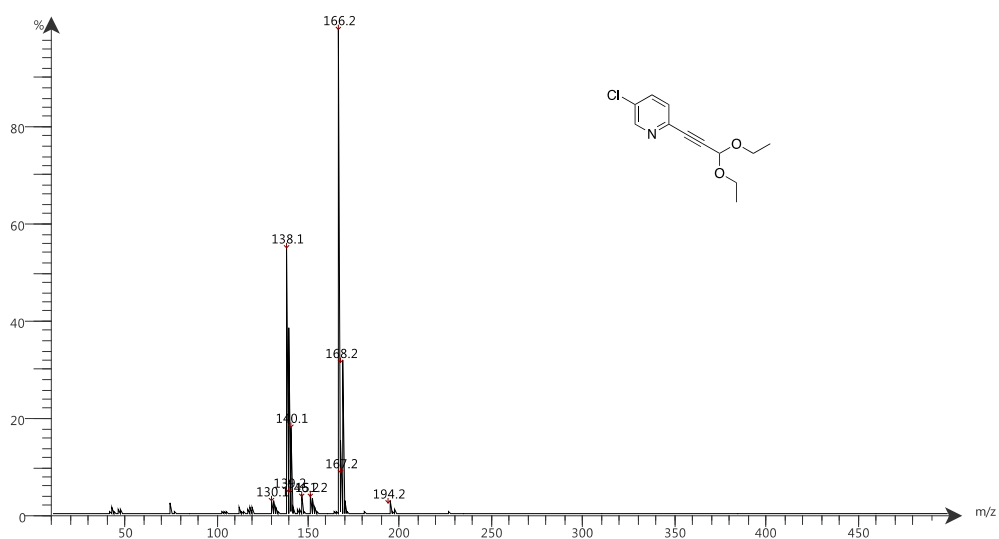

**Figure S47.** APCI Mass spectrum of 5-chloro-2-(3,3-diethoxyprop-1-yn-1-yl)pyridine (**2c**).

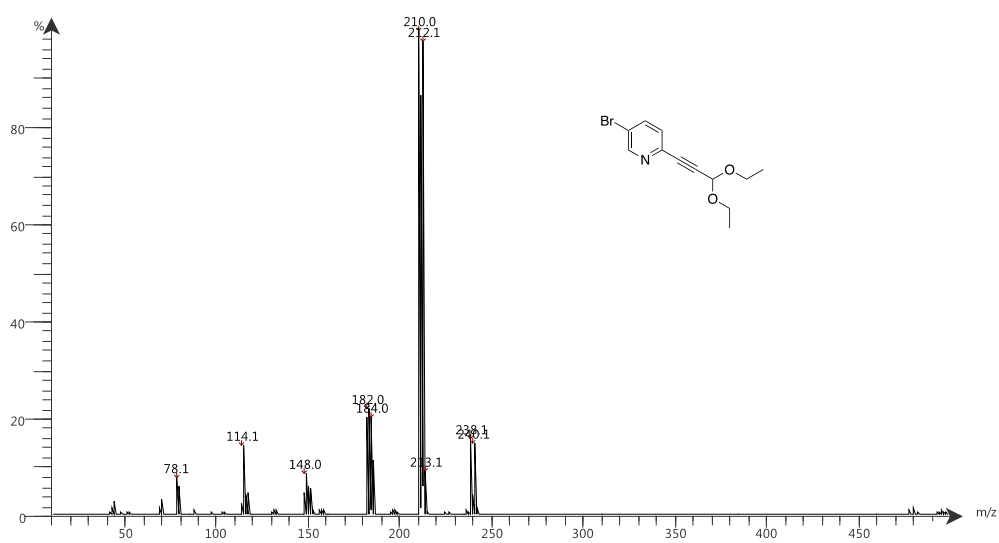

**Figure S48.** APCI Mass spectrum of 5-bromo-2-(3,3-diethoxyprop-1-yn-1-yl)pyridine (**2d**).

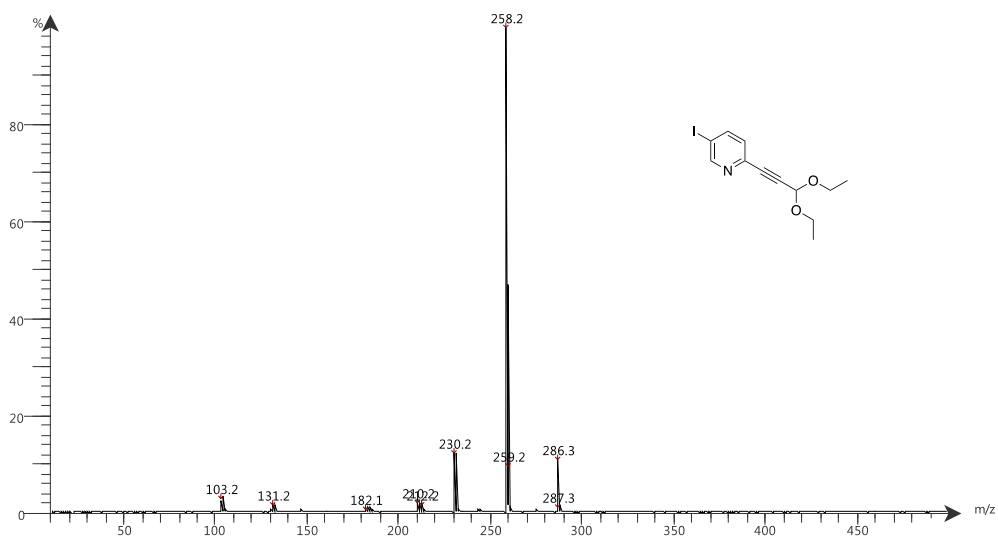

**Figure S49.** APCI Mass spectrum of 5-iodo-2-(3,3-diethoxyprop-1-yn-1-yl)pyridine (**2e**).

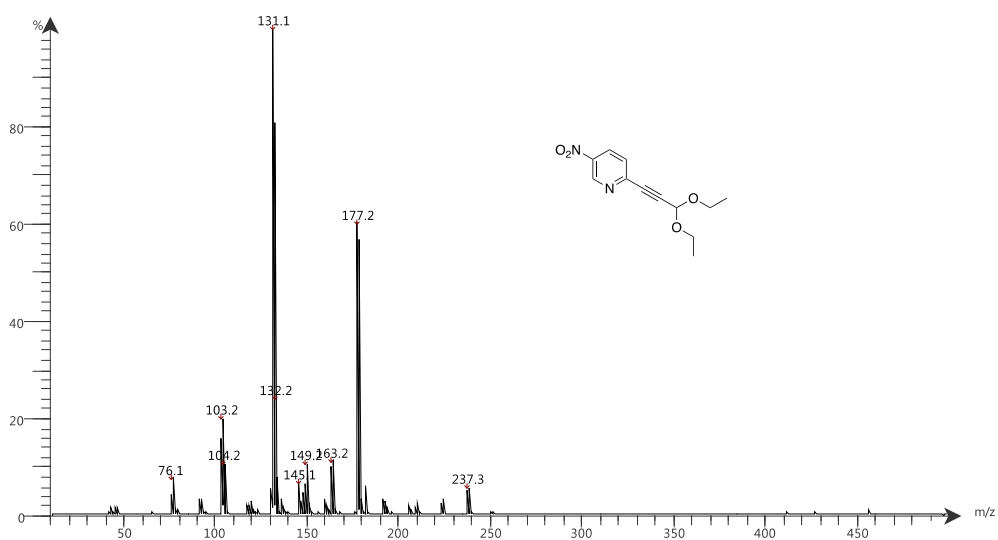

**Figure S50.** APCI Mass spectrum of 5-nitro-2-(3,3-diethoxyprop-1-yn-1-yl)pyridine (**2f**).

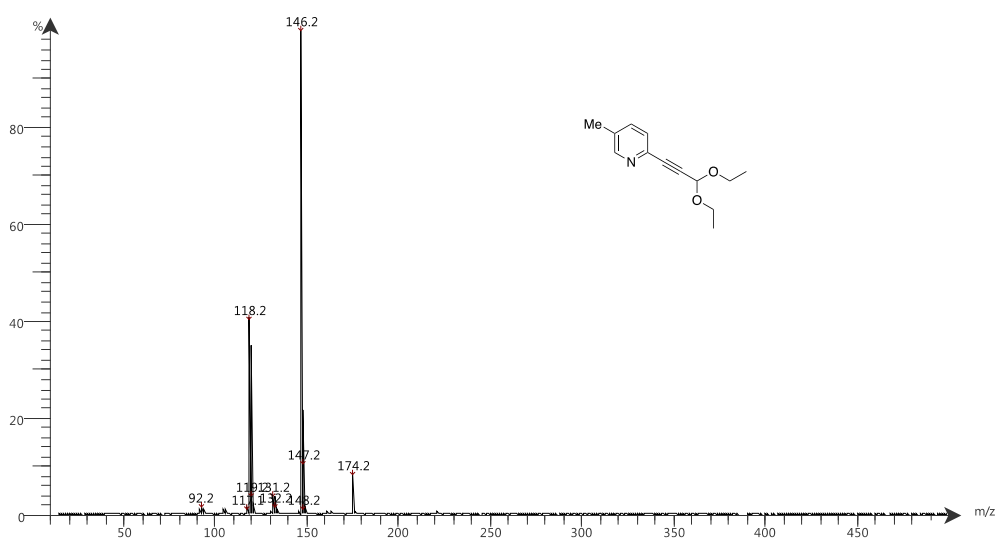

**Figure S51.** APCI Mass spectrum of 5-methyl-2-(3,3-diethoxyprop-1-yn-1-yl)pyridine (**2g**).

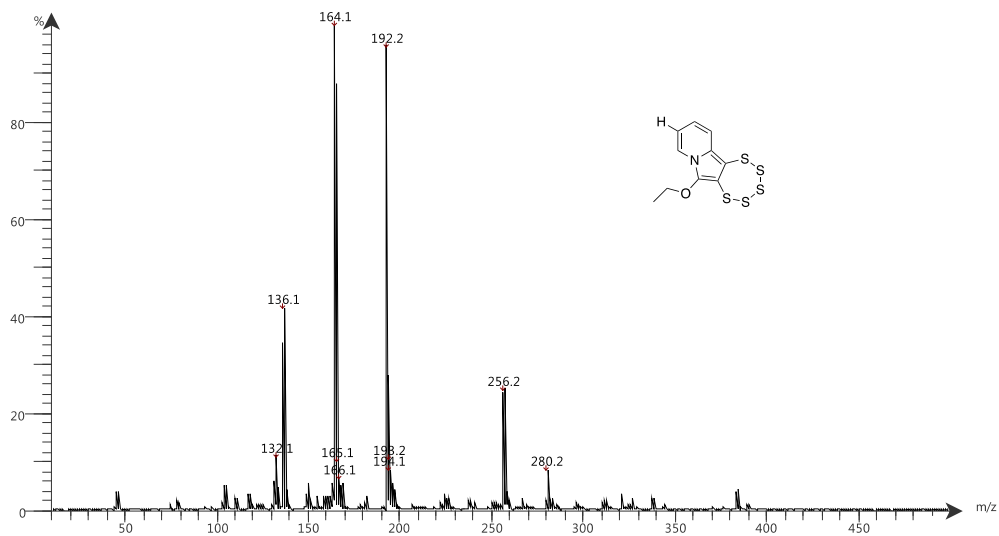

**Figure S52.** APCI Mass spectrum of 6-ethoxy-[1,2,3,4,5]pentathiepino[6,7-a]indolizine (**3a**).

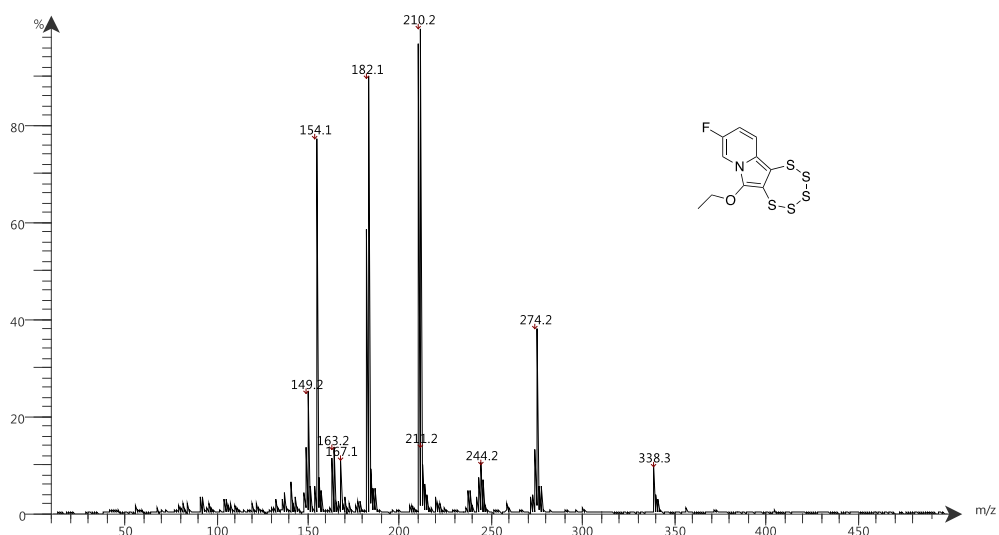

**Figure S53.** APCI Mass spectrum of 6-ethoxy-9-fluoro-[1,2,3,4,5]pentathiepino[6,7-a]indolizine (**3b**).

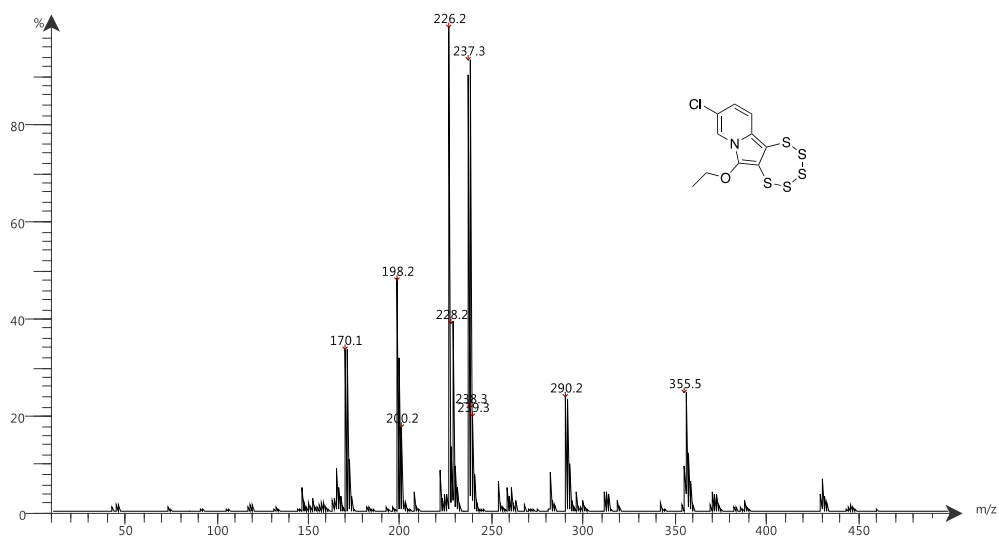

**Figure S54.** APCI Mass spectrum 6-ethoxy-9-chloro-[1,2,3,4,5]pentathiepino[6,7-a]indolizine (**3c**).

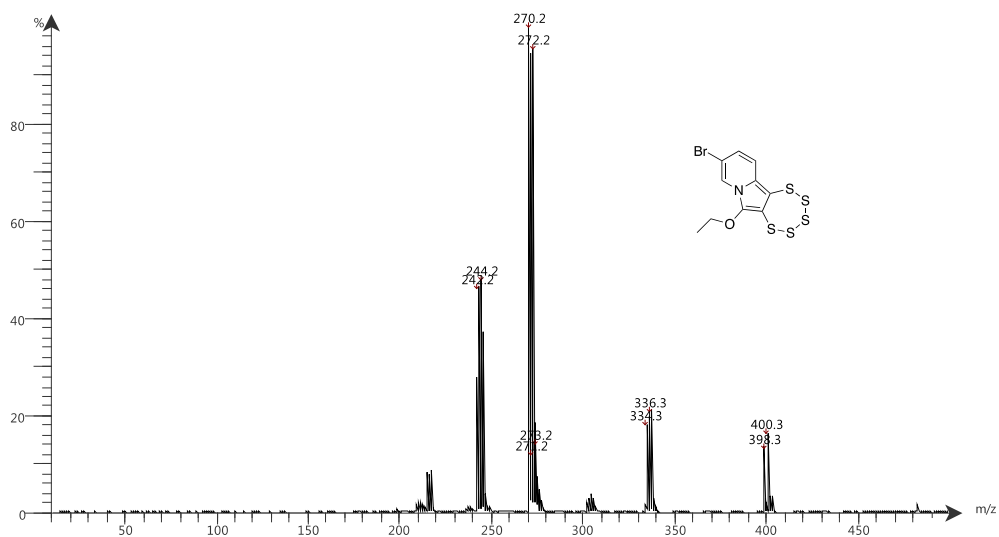

**Figure S55.** APCI Mass spectrum of 6-ethoxy-9-bromo-[1,2,3,4,5]pentathiepino[6,7-a]indolizine (**3d**).

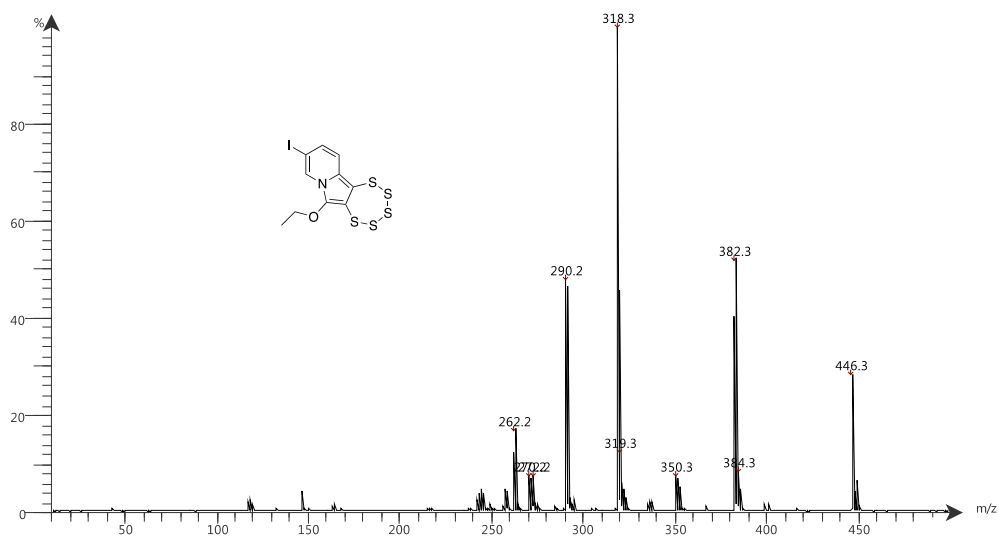

**Figure S56.** APCI Mass spectrum of 6-ethoxy-9-iodo-[1,2,3,4,5]pentathiepino[6,7-a]indolizine (**3e**).

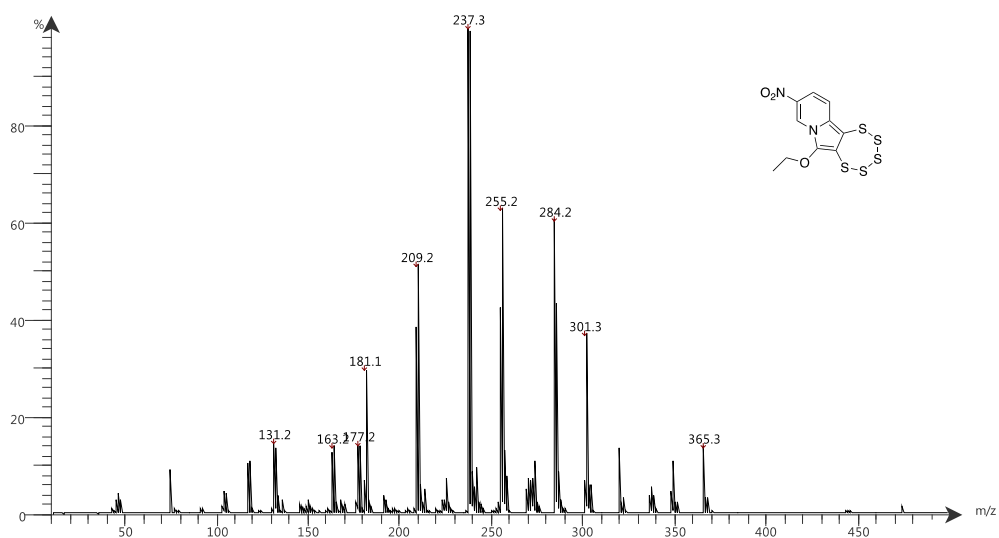

**Figure S57.** APCI Mass spectrum of 6-ethoxy-9-nitro-[1,2,3,4,5]pentathiepino[6,7-a]indolizine (**3f**).

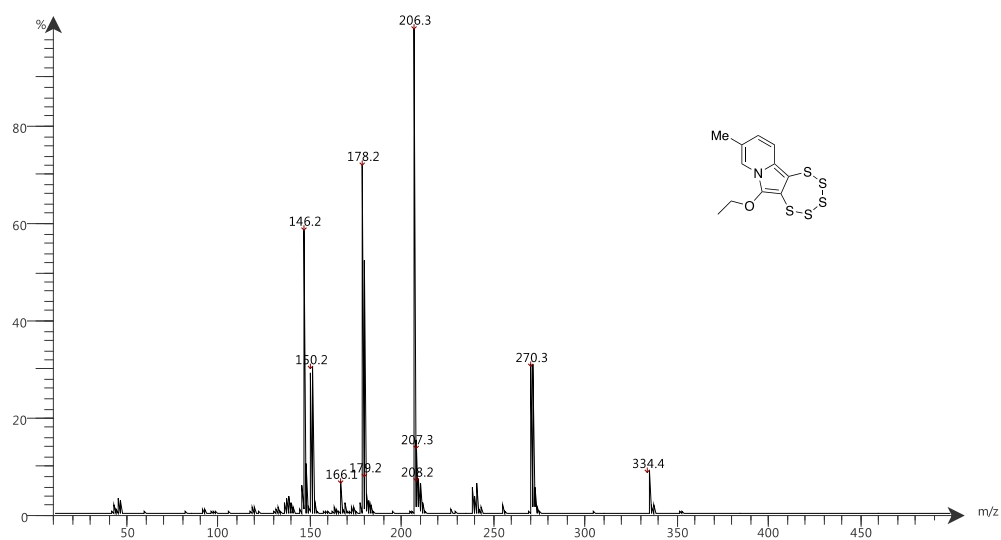

**Figure S58.** APCI Mass spectrum of 6-ethoxy-9-methyl-[1,2,3,4,5]pentathiepine[6,7-a]indolizine (**3g**).

**Table S1.** Comparison Between Dipole Moments and HOMO LUMO ENERGIES **3a** and **3f**

|           | Dipole Moment (D) | HOMO – LUMO gap (eV) | HOMO (eV) | LUMO (eV) |
|-----------|-------------------|----------------------|-----------|-----------|
| <b>3a</b> | 5.41527           | 3.757                | -5.597    | -1.840    |
| <b>3f</b> | 2.36905           | 3.150                | -6.100    | -2.905    |

**Table S2.** Mulliken Atomic Charges for **3a**-----  
MULLIKEN ATOMIC CHARGES  
-----

0 S : -0.037408  
 1 S : -0.048672  
 2 S : -0.021227  
 3 S : -0.050599  
 4 S : -0.050192  
 5 O : -0.329775  
 6 N : 0.038046  
 7 C : 0.197727  
 8 C : -0.017454  
 9 C : -0.031557  
 10 C : 0.131295  
 11 C : -0.234629  
 12 H : 0.120455  
 13 C : -0.076850  
 14 H : 0.132511  
 15 C : -0.121277  
 16 H : 0.128078  
 17 C : -0.115245  
 18 H : 0.157232  
 19 C : -0.014908  
 20 H : 0.096235  
 21 H : 0.111672  
 22 C : -0.298121  
 23 H : 0.107747  
 24 H : 0.109827  
 25 H : 0.117088

Sum of atomic charges: 0.0000000

**Table S3.** Summary of TD-DFT calculated first 20 low energy transitions of **3a**.-----  
TD-DFT/TDA EXCITED STATES (SINGLETs)  
-----

the weight of the individual excitations are printed if larger than 1.0e-02

STATE 1: E= 0.121751 au 3.313 eV 26721.3 cm<sup>-1</sup> <S<sup>2</sup>> = 0.000000  
 81a -> 82a : 0.915576 (c= 0.95685750)  
 81a -> 85a : 0.014607 (c= -0.12086132)

STATE 2: E= 0.139057 au 3.784 eV 30519.6 cm<sup>-1</sup> <S<sup>2</sup>> = 0.000000  
 80a -> 82a : 0.586347 (c= 0.76573311)  
 80a -> 84a : 0.015351 (c= 0.12390116)  
 81a -> 83a : 0.120748 (c= -0.34748858)  
 81a -> 84a : 0.214701 (c= 0.46335830)  
 81a -> 85a : 0.032526 (c= 0.18035000)

STATE 3: E= 0.139643 au 3.800 eV 30648.2 cm<sup>-1</sup> <S<sup>2</sup>> = 0.000000  
 79a -> 82a : 0.012511 (c= 0.11185280)  
 80a -> 82a : 0.067112 (c= -0.25905925)

81a -> 83a : 0.840163 (c= -0.91660396)  
81a -> 84a : 0.066073 (c= -0.25704572)

STATE 4: E= 0.143515 au 3.905 eV 31497.8 cm<sup>-1</sup> <S<sup>2</sup>> = 0.000000

76a -> 82a : 0.020137 (c= -0.14190657)  
77a -> 82a : 0.031865 (c= 0.17850718)  
78a -> 82a : 0.037096 (c= 0.19260428)  
80a -> 82a : 0.253167 (c= -0.50315710)  
80a -> 84a : 0.014638 (c= -0.12098814)  
81a -> 84a : 0.609223 (c= 0.78052755)

STATE 5: E= 0.148861 au 4.051 eV 32671.1 cm<sup>-1</sup> <S<sup>2</sup>> = 0.000000

78a -> 82a : 0.163018 (c= -0.40375443)  
79a -> 82a : 0.744221 (c= -0.86268224)  
79a -> 84a : 0.013962 (c= -0.11816094)

STATE 6: E= 0.151269 au 4.116 eV 33199.7 cm<sup>-1</sup> <S<sup>2</sup>> = 0.000000

77a -> 82a : 0.117265 (c= -0.34244029)  
78a -> 82a : 0.648098 (c= 0.80504517)  
78a -> 83a : 0.013808 (c= -0.11750697)  
78a -> 84a : 0.020186 (c= 0.14207894)  
79a -> 82a : 0.111095 (c= -0.33330974)  
81a -> 85a : 0.026331 (c= 0.16226715)

STATE 7: E= 0.153658 au 4.181 eV 33724.1 cm<sup>-1</sup> <S<sup>2</sup>> = 0.000000

77a -> 82a : 0.645829 (c= 0.80363462)  
77a -> 84a : 0.024033 (c= 0.15502559)  
78a -> 82a : 0.026997 (c= 0.16430716)  
80a -> 83a : 0.011785 (c= -0.10855743)  
80a -> 84a : 0.012221 (c= -0.11054811)  
81a -> 84a : 0.041729 (c= -0.20427636)  
81a -> 85a : 0.187689 (c= 0.43323047)

STATE 8: E= 0.157891 au 4.296 eV 34653.1 cm<sup>-1</sup> <S<sup>2</sup>> = 0.000000

76a -> 82a : 0.306961 (c= -0.55404064)  
77a -> 82a : 0.054067 (c= -0.23252274)  
78a -> 82a : 0.019402 (c= -0.13929140)  
79a -> 82a : 0.014421 (c= 0.12008618)  
79a -> 83a : 0.011566 (c= 0.10754493)  
80a -> 83a : 0.073947 (c= 0.27193159)  
81a -> 85a : 0.411717 (c= 0.64165148)  
81a -> 87a : 0.030823 (c= -0.17556407)

STATE 9: E= 0.163086 au 4.438 eV 35793.1 cm<sup>-1</sup> <S<sup>2</sup>> = 0.000000

76a -> 82a : 0.016721 (c= 0.12930966)  
77a -> 82a : 0.027943 (c= 0.16716156)  
78a -> 82a : 0.013585 (c= 0.11655447)  
78a -> 83a : 0.011881 (c= -0.10900139)  
79a -> 82a : 0.015776 (c= -0.12560388)  
79a -> 83a : 0.029631 (c= 0.17213758)  
80a -> 83a : 0.751461 (c= 0.86686840)  
80a -> 84a : 0.055288 (c= 0.23513354)  
81a -> 85a : 0.021378 (c= -0.14621213)  
81a -> 86a : 0.011602 (c= 0.10771432)

STATE 10: E= 0.167296 au 4.552 eV 36717.2 cm<sup>-1</sup> <S<sup>2</sup>> = 0.000000

76a -> 82a : 0.175387 (c= -0.41879253)  
80a -> 83a : 0.011072 (c= -0.10522466)

81a -> 85a : 0.056952 (c= -0.23864671)  
81a -> 86a : 0.631715 (c= 0.79480512)  
81a -> 87a : 0.034334 (c= 0.18529360)

STATE 11: E= 0.169418 au 4.610 eV 37183.0 cm<sup>-1</sup> <S<sup>2</sup>> = 0.000000

76a -> 82a : 0.277157 (c= 0.52645680)  
77a -> 82a : 0.033774 (c= -0.18377696)  
77a -> 83a : 0.042631 (c= -0.20647207)  
77a -> 84a : 0.014471 (c= -0.12029369)  
78a -> 83a : 0.023597 (c= 0.15361401)  
79a -> 82a : 0.020067 (c= 0.14165746)  
80a -> 83a : 0.011660 (c= 0.10798067)  
80a -> 84a : 0.201723 (c= -0.44913596)  
80a -> 85a : 0.016622 (c= -0.12892526)  
80a -> 86a : 0.031449 (c= 0.17733807)  
81a -> 85a : 0.049952 (c= 0.22349850)  
81a -> 86a : 0.178213 (c= 0.42215252)  
81a -> 87a : 0.033309 (c= -0.18250690)

STATE 12: E= 0.170696 au 4.645 eV 37463.5 cm<sup>-1</sup> <S<sup>2</sup>> = 0.000000

76a -> 82a : 0.055371 (c= 0.23531092)  
77a -> 83a : 0.091997 (c= 0.30331001)  
78a -> 83a : 0.032568 (c= -0.18046699)  
78a -> 84a : 0.028045 (c= -0.16746543)  
79a -> 83a : 0.353332 (c= 0.59441751)  
79a -> 84a : 0.011207 (c= 0.10586218)  
80a -> 82a : 0.013759 (c= -0.11730060)  
80a -> 83a : 0.053954 (c= -0.23228041)  
80a -> 84a : 0.136327 (c= 0.36922503)  
80a -> 86a : 0.032994 (c= -0.18164360)  
81a -> 86a : 0.105160 (c= 0.32428374)  
81a -> 87a : 0.045943 (c= -0.21434256)

STATE 13: E= 0.173621 au 4.724 eV 38105.3 cm<sup>-1</sup> <S<sup>2</sup>> = 0.000000

77a -> 83a : 0.082967 (c= -0.28804053)  
78a -> 83a : 0.411920 (c= 0.64180995)  
78a -> 84a : 0.034839 (c= 0.18665259)  
78a -> 86a : 0.010760 (c= -0.10373207)  
79a -> 83a : 0.220962 (c= 0.47006566)  
80a -> 85a : 0.119508 (c= 0.34569980)  
80a -> 86a : 0.029720 (c= 0.17239489)  
80a -> 87a : 0.010781 (c= -0.10383315)

STATE 14: E= 0.175267 au 4.769 eV 38466.7 cm<sup>-1</sup> <S<sup>2</sup>> = 0.000000

78a -> 83a : 0.151780 (c= 0.38958987)  
79a -> 83a : 0.135089 (c= -0.36754402)  
79a -> 84a : 0.045319 (c= -0.21288194)  
80a -> 82a : 0.018355 (c= -0.13548087)  
80a -> 84a : 0.409743 (c= 0.64011190)  
80a -> 85a : 0.066854 (c= -0.25856099)  
81a -> 85a : 0.016134 (c= 0.12701873)  
81a -> 86a : 0.014936 (c= 0.12221253)  
81a -> 87a : 0.080163 (c= -0.28313013)

STATE 15: E= 0.177428 au 4.828 eV 38941.0 cm<sup>-1</sup> <S<sup>2</sup>> = 0.000000

76a -> 83a : 0.036155 (c= 0.19014470)  
77a -> 83a : 0.556974 (c= 0.74630706)  
77a -> 84a : 0.035275 (c= 0.18781654)

78a -> 83a : 0.234776 (c= 0.48453672)  
 80a -> 83a : 0.023436 (c= 0.15308965)  
 80a -> 84a : 0.050573 (c= -0.22488338)  
 80a -> 86a : 0.011805 (c= -0.10865073)

STATE 16: E= 0.178917 au 4.869 eV 39267.8 cm<sup>-1</sup> <S<sup>2</sup>> = 0.000000

77a -> 85a : 0.014955 (c= -0.12229248)  
 78a -> 83a : 0.017800 (c= -0.13341634)  
 78a -> 84a : 0.056349 (c= -0.23737870)  
 79a -> 82a : 0.018475 (c= 0.13592170)  
 79a -> 83a : 0.030699 (c= 0.17521029)  
 79a -> 84a : 0.681173 (c= -0.82533185)  
 79a -> 86a : 0.022108 (c= 0.14868673)  
 80a -> 85a : 0.016923 (c= 0.13008783)  
 80a -> 86a : 0.063059 (c= 0.25111497)  
 81a -> 86a : 0.011900 (c= -0.10908813)

STATE 17: E= 0.181747 au 4.946 eV 39888.9 cm<sup>-1</sup> <S<sup>2</sup>> = 0.000000

76a -> 82a : 0.015765 (c= 0.12555910)  
 77a -> 83a : 0.014076 (c= 0.11864377)  
 77a -> 84a : 0.192503 (c= -0.43875111)  
 77a -> 85a : 0.054986 (c= -0.23449024)  
 78a -> 84a : 0.155703 (c= -0.39459227)  
 79a -> 83a : 0.079460 (c= -0.28188685)  
 79a -> 84a : 0.048320 (c= 0.21981701)  
 79a -> 85a : 0.010466 (c= -0.10230498)  
 80a -> 84a : 0.020824 (c= 0.14430544)  
 80a -> 85a : 0.169261 (c= 0.41141294)  
 81a -> 85a : 0.013171 (c= 0.11476456)  
 81a -> 87a : 0.126105 (c= 0.35511268)

STATE 18: E= 0.184555 au 5.022 eV 40505.2 cm<sup>-1</sup> <S<sup>2</sup>> = 0.000000

75a -> 82a : 0.013117 (c= 0.11452966)  
 76a -> 85a : 0.010614 (c= -0.10302406)  
 77a -> 83a : 0.079591 (c= -0.28211867)  
 77a -> 84a : 0.054635 (c= 0.23374192)  
 77a -> 85a : 0.077182 (c= 0.27781672)  
 78a -> 82a : 0.012813 (c= 0.11319505)  
 78a -> 83a : 0.023043 (c= 0.15179878)  
 78a -> 84a : 0.378026 (c= -0.61483781)  
 78a -> 85a : 0.099923 (c= -0.31610677)  
 79a -> 85a : 0.013858 (c= -0.11772092)  
 79a -> 86a : 0.026035 (c= -0.16135272)  
 80a -> 85a : 0.028516 (c= -0.16886634)  
 80a -> 86a : 0.069101 (c= -0.26287126)  
 81a -> 87a : 0.057853 (c= 0.24052750)

STATE 19: E= 0.186116 au 5.064 eV 40847.7 cm<sup>-1</sup> <S<sup>2</sup>> = 0.000000

76a -> 82a : 0.015075 (c= 0.12277856)  
 76a -> 83a : 0.013043 (c= 0.11420428)  
 76a -> 84a : 0.023543 (c= -0.15343696)  
 76a -> 85a : 0.024147 (c= 0.15539442)  
 77a -> 84a : 0.314366 (c= 0.56068349)  
 77a -> 85a : 0.014220 (c= -0.11924829)  
 78a -> 85a : 0.027143 (c= -0.16475075)  
 78a -> 86a : 0.017701 (c= 0.13304515)  
 79a -> 83a : 0.049668 (c= -0.22286249)  
 79a -> 85a : 0.111112 (c= -0.33333474)

80a -> 85a : 0.229704 (c= 0.47927413)  
 80a -> 86a : 0.013453 (c= 0.11598900)  
 81a -> 87a : 0.098794 (c= -0.31431562)

STATE 20: E= 0.187024 au 5.089 eV 41047.1 cm\*\*<sup>-1</sup> <S\*\*2> = 0.000000

76a -> 83a : 0.066899 (c= -0.25864919)  
 77a -> 84a : 0.068375 (c= 0.26148679)  
 78a -> 84a : 0.077373 (c= -0.27815992)  
 78a -> 85a : 0.022836 (c= 0.15111514)  
 78a -> 86a : 0.024230 (c= 0.15566127)  
 79a -> 83a : 0.010465 (c= -0.10229671)  
 79a -> 85a : 0.612678 (c= 0.78273736)  
 80a -> 85a : 0.028459 (c= 0.16869942)  
 80a -> 86a : 0.028069 (c= 0.16753825)

---

ABSORPTION SPECTRUM VIA TRANSITION ELECTRIC DIPOLE MOMENTS

---

| State | Energy<br>(cm-1) | Wavelength<br>(nm) | fosc<br>(au**2) | T2<br>(au) | TX<br>(au) | TY<br>(au) | TZ       |
|-------|------------------|--------------------|-----------------|------------|------------|------------|----------|
| 1     | 26721.3          | 374.2              | 0.148618139     | 1.83100    | 0.10277    | -1.34324   | 0.12708  |
| 2     | 30519.6          | 327.7              | 0.005001742     | 0.05395    | 0.11089    | 0.19256    | 0.06766  |
| 3     | 30648.2          | 326.3              | 0.006422274     | 0.06899    | 0.16758    | -0.13113   | 0.15397  |
| 4     | 31497.8          | 317.5              | 0.014031813     | 0.14666    | -0.00262   | -0.35880   | -0.13384 |
| 5     | 32671.1          | 306.1              | 0.009057343     | 0.09127    | 0.21828    | -0.05854   | 0.20049  |
| 6     | 33199.7          | 301.2              | 0.003472390     | 0.03443    | 0.13931    | -0.08281   | 0.09038  |
| 7     | 33724.1          | 296.5              | 0.002791267     | 0.02725    | -0.05896   | -0.14658   | 0.04781  |
| 8     | 34653.1          | 288.6              | 0.038314994     | 0.36400    | -0.14321   | -0.54521   | -0.21502 |
| 9     | 35793.1          | 279.4              | 0.019364365     | 0.17811    | 0.08499    | 0.08405    | 0.40474  |
| 10    | 36717.2          | 272.4              | 0.023828239     | 0.21365    | 0.12002    | 0.43852    | 0.08332  |
| 11    | 37183.0          | 268.9              | 0.045218334     | 0.40035    | -0.08595   | -0.62110   | -0.08484 |
| 12    | 37463.5          | 266.9              | 0.011333825     | 0.09960    | -0.18194   | -0.19824   | -0.16491 |
| 13    | 38105.3          | 262.4              | 0.014501893     | 0.12529    | 0.11222    | 0.27470    | 0.19297  |
| 14    | 38466.7          | 260.0              | 0.017751950     | 0.15193    | 0.11678    | -0.37181   | -0.00684 |
| 15    | 38941.0          | 256.8              | 0.003139964     | 0.02655    | 0.03072    | 0.14530    | 0.06701  |
| 16    | 39267.8          | 254.7              | 0.001271196     | 0.01066    | 0.04046    | 0.09488    | 0.00432  |
| 17    | 39888.9          | 250.7              | 0.058227983     | 0.48057    | 0.08735    | -0.65926   | -0.19575 |
| 18    | 40505.2          | 246.9              | 0.021816308     | 0.17732    | 0.14110    | 0.29928    | 0.26046  |
| 19    | 40847.7          | 244.8              | 0.030296713     | 0.24418    | 0.11777    | -0.45945   | -0.13862 |
| 20    | 41047.1          | 243.6              | 0.002402289     | 0.01927    | 0.00817    | -0.13820   | 0.01002  |

---

ABSORPTION SPECTRUM VIA TRANSITION VELOCITY DIPOLE MOMENTS

---

| State | Energy<br>(cm-1) | Wavelength<br>(nm) | fosc<br>(au**2) | P2<br>(au) | PX<br>(au) | PY<br>(au) | PZ       |
|-------|------------------|--------------------|-----------------|------------|------------|------------|----------|
| 1     | 26721.3          | 374.2              | 0.007888048     | 0.00144    | 0.00569    | -0.00558   | 0.03711  |
| 2     | 30519.6          | 327.7              | 0.000594665     | 0.00012    | -0.00145   | 0.00750    | -0.00811 |
| 3     | 30648.2          | 326.3              | 0.002321943     | 0.00049    | -0.01887   | 0.00740    | 0.00869  |
| 4     | 31497.8          | 317.5              | 0.010505104     | 0.00226    | -0.02027   | 0.03464    | -0.02552 |
| 5     | 32671.1          | 306.1              | 0.000512144     | 0.00011    | -0.00840   | 0.00521    | -0.00408 |
| 6     | 33199.7          | 301.2              | 0.008697934     | 0.00197    | -0.01502   | -0.03909   | 0.01483  |
| 7     | 33724.1          | 296.5              | 0.004047782     | 0.00093    | 0.02334    | 0.01950    | -0.00282 |
| 8     | 34653.1          | 288.6              | 0.001534433     | 0.00036    | -0.00816   | 0.00797    | 0.01527  |
| 9     | 35793.1          | 279.4              | 0.025352369     | 0.00620    | 0.05071    | 0.01561    | -0.05820 |
| 10    | 36717.2          | 272.4              | 0.003780357     | 0.00095    | -0.00002   | -0.03074   | 0.00189  |

|    |         |       |             |         |          |          |          |
|----|---------|-------|-------------|---------|----------|----------|----------|
| 11 | 37183.0 | 268.9 | 0.009498863 | 0.00241 | 0.00341  | 0.04670  | -0.01487 |
| 12 | 37463.5 | 266.9 | 0.000894688 | 0.00023 | 0.01266  | -0.00071 | 0.00827  |
| 13 | 38105.3 | 262.4 | 0.015811580 | 0.00412 | -0.02498 | -0.05817 | 0.01052  |
| 14 | 38466.7 | 260.0 | 0.002608259 | 0.00069 | -0.00274 | 0.02023  | -0.01640 |
| 15 | 38941.0 | 256.8 | 0.004582063 | 0.00122 | -0.00683 | -0.03379 | 0.00559  |
| 16 | 39267.8 | 254.7 | 0.000593821 | 0.00016 | -0.00842 | -0.00585 | 0.00737  |
| 17 | 39888.9 | 250.7 | 0.013038121 | 0.00355 | 0.00729  | 0.02828  | 0.05197  |
| 18 | 40505.2 | 246.9 | 0.007758747 | 0.00215 | -0.03784 | -0.01117 | -0.02431 |
| 19 | 40847.7 | 244.8 | 0.011617955 | 0.00324 | -0.00647 | 0.05226  | 0.02170  |
| 20 | 41047.1 | 243.6 | 0.002271134 | 0.00064 | 0.01102  | 0.01791  | -0.01396 |

**Table S4.** Electric properties calculations of **3a**.

The origin for moment calculation is the CENTER OF MASS = ( 9.610306, 19.006217 12.966919)

-----  
DIPOLE MOMENT

|                          | X        | Y         | Z         |
|--------------------------|----------|-----------|-----------|
| Electronic contribution: | -4.04877 | 22.23335  | -10.62197 |
| Nuclear contribution :   | 3.78769  | -24.24490 | 11.27350  |

-----  
Total Dipole Moment : -0.26108 -2.01155 0.65153

-----  
Magnitude (a.u.) : 2.13049

Magnitude (Debye) : 5.41527

-----  
Rotational spectrum

-----  
Rotational constants in cm-1: 0.013645 0.008755 0.005837  
Rotational constants in MHz : 409.064025 262.453777 174.982524

Dipole components along the rotational axes:

x,y,z [a.u.]: -1.997973 -0.098822 0.733021

x,y,z [Debye]: -5.078445 -0.251185 1.863192

**Table S5.** Mulliken Charges for **3f**

-----  
MULLIKEN ATOMIC CHARGES

-----  
0 S : -0.030390  
1 S : -0.037355  
2 S : -0.010330  
3 S : -0.037543  
4 S : -0.035342  
5 O : -0.330306  
6 O : -0.320456  
7 O : -0.304417  
8 N : 0.043297  
9 N : 0.418031  
10 C : -0.290881  
11 H : 0.113240  
12 H : 0.114096  
13 H : 0.109590  
14 C : -0.008707  
15 H : 0.107906  
16 H : 0.099927

17 C : 0.231450  
 18 C : -0.032241  
 19 C : -0.022416  
 20 C : 0.141567  
 21 C : -0.218190  
 22 H : 0.123942  
 23 C : -0.153833  
 24 H : 0.162161  
 25 C : 0.110293  
 26 C : -0.126437  
 27 H : 0.183339

Sum of atomic charges: 0.0000000

**Table S6.** Summary of TD-DFT calculated first 20 low energy transitions of **3f**.

-----  
 TD-DFT/TDA EXCITED STATES (SINGLETs)  
 -----

the weight of the individual excitations are printed if larger than 1.0e-02

STATE 1: E= 0.097144 au 2.643 eV 21320.7 cm<sup>-1</sup> <S<sup>2</sup>> = 0.000000  
 92a -> 93a : 0.968611 (c= -0.98418029)

STATE 2: E= 0.126302 au 3.437 eV 27720.2 cm<sup>-1</sup> <S<sup>2</sup>> = 0.000000  
 87a -> 93a : 0.012088 (c= -0.10994337)  
 88a -> 93a : 0.026520 (c= -0.16284891)  
 91a -> 93a : 0.271837 (c= -0.52138021)  
 92a -> 94a : 0.634348 (c= 0.79645969)

STATE 3: E= 0.134524 au 3.661 eV 29524.7 cm<sup>-1</sup> <S<sup>2</sup>> = 0.000000  
 87a -> 93a : 0.019860 (c= 0.14092474)  
 88a -> 93a : 0.051426 (c= 0.22677365)  
 91a -> 93a : 0.663955 (c= -0.81483406)  
 91a -> 94a : 0.021844 (c= 0.14779691)  
 92a -> 94a : 0.188617 (c= -0.43430049)  
 92a -> 96a : 0.016694 (c= -0.12920673)

STATE 4: E= 0.135423 au 3.685 eV 29721.9 cm<sup>-1</sup> <S<sup>2</sup>> = 0.000000  
 89a -> 93a : 0.017568 (c= 0.13254474)  
 90a -> 93a : 0.924296 (c= -0.96140334)  
 90a -> 94a : 0.022996 (c= 0.15164453)

STATE 5: E= 0.138709 au 3.774 eV 30443.1 cm<sup>-1</sup> <S<sup>2</sup>> = 0.000000  
 86a -> 93a : 0.026293 (c= 0.16214985)  
 89a -> 93a : 0.883192 (c= 0.93978306)  
 89a -> 94a : 0.038872 (c= -0.19715904)  
 90a -> 93a : 0.018846 (c= 0.13728160)

STATE 6: E= 0.141960 au 3.863 eV 31156.7 cm<sup>-1</sup> <S<sup>2</sup>> = 0.000000  
 86a -> 93a : 0.827233 (c= 0.90952359)  
 86a -> 94a : 0.034834 (c= 0.18663853)  
 86a -> 97a : 0.013376 (c= -0.11565563)  
 88a -> 93a : 0.051354 (c= -0.22661427)  
 89a -> 93a : 0.031760 (c= -0.17821442)

STATE 7: E= 0.145121 au 3.949 eV 31850.3 cm<sup>-1</sup> <S<sup>2</sup>> = 0.000000  
 86a -> 93a : 0.042246 (c= 0.20553798)  
 87a -> 93a : 0.049429 (c= -0.22232571)

88a -> 93a : 0.441661 (c= 0.66457566)  
88a -> 94a : 0.010090 (c= -0.10044855)  
90a -> 94a : 0.011223 (c= 0.10593862)  
92a -> 95a : 0.391606 (c= -0.62578464)

STATE 8: E= 0.145886 au 3.970 eV 32018.3 cm<sup>-1</sup> <S<sup>2</sup>> = 0.000000

87a -> 93a : 0.037200 (c= -0.19287226)  
88a -> 93a : 0.181457 (c= 0.42597761)  
91a -> 94a : 0.394083 (c= -0.62776022)  
91a -> 95a : 0.012577 (c= 0.11214638)  
91a -> 96a : 0.011237 (c= -0.10600649)  
92a -> 95a : 0.243633 (c= 0.49359185)  
92a -> 96a : 0.057016 (c= 0.23877942)  
92a -> 97a : 0.011502 (c= -0.10724587)

STATE 9: E= 0.146285 au 3.981 eV 32105.8 cm<sup>-1</sup> <S<sup>2</sup>> = 0.000000

88a -> 93a : 0.073210 (c= -0.27057289)  
88a -> 94a : 0.015495 (c= 0.12448056)  
90a -> 94a : 0.019506 (c= 0.13966323)  
91a -> 93a : 0.020112 (c= -0.14181527)  
91a -> 94a : 0.475087 (c= -0.68926552)  
91a -> 96a : 0.011144 (c= -0.10556597)  
92a -> 95a : 0.233723 (c= -0.48344939)  
92a -> 96a : 0.119410 (c= -0.34555769)

STATE 10: E= 0.150561 au 4.097 eV 33044.3 cm<sup>-1</sup> <S<sup>2</sup>> = 0.000000

87a -> 93a : 0.200292 (c= -0.44753946)  
88a -> 94a : 0.014277 (c= 0.11948522)  
89a -> 94a : 0.133718 (c= -0.36567520)  
90a -> 93a : 0.011748 (c= 0.10838949)  
90a -> 94a : 0.476963 (c= 0.69062475)  
91a -> 94a : 0.018403 (c= 0.13565857)  
92a -> 95a : 0.031622 (c= 0.17782503)  
92a -> 96a : 0.045715 (c= -0.21381125)

STATE 11: E= 0.151728 au 4.129 eV 33300.5 cm<sup>-1</sup> <S<sup>2</sup>> = 0.000000

87a -> 93a : 0.204013 (c= -0.45167766)  
88a -> 94a : 0.058726 (c= -0.24233382)  
90a -> 94a : 0.243910 (c= -0.49387260)  
92a -> 96a : 0.415922 (c= -0.64492041)

STATE 12: E= 0.154654 au 4.208 eV 33942.6 cm<sup>-1</sup> <S<sup>2</sup>> = 0.000000

88a -> 94a : 0.012829 (c= -0.11326732)  
89a -> 93a : 0.031381 (c= -0.17714575)  
89a -> 94a : 0.666695 (c= -0.81651404)  
89a -> 96a : 0.017317 (c= -0.13159301)  
90a -> 94a : 0.083362 (c= -0.28872414)  
92a -> 95a : 0.018144 (c= -0.13470141)  
92a -> 96a : 0.118691 (c= 0.34451523)

STATE 13: E= 0.158065 au 4.301 eV 34691.2 cm<sup>-1</sup> <S<sup>2</sup>> = 0.000000

87a -> 93a : 0.194462 (c= -0.44097836)  
88a -> 94a : 0.388004 (c= 0.62289998)  
90a -> 94a : 0.043529 (c= -0.20863523)  
92a -> 96a : 0.020061 (c= 0.14163535)  
92a -> 97a : 0.251567 (c= 0.50156476)

STATE 14: E= 0.162339 au 4.417 eV 35629.3 cm<sup>-1</sup> <S<sup>2</sup>> = 0.000000

87a -> 93a : 0.187833 (c= 0.43339751)  
 88a -> 93a : 0.117909 (c= 0.34337850)  
 88a -> 94a : 0.261793 (c= 0.51165743)  
 88a -> 96a : 0.012618 (c= 0.11232854)  
 89a -> 94a : 0.056195 (c= -0.23705487)  
 91a -> 93a : 0.015760 (c= 0.12554076)  
 91a -> 95a : 0.035626 (c= -0.18874980)  
 92a -> 94a : 0.055445 (c= 0.23546751)  
 92a -> 95a : 0.017504 (c= 0.13230119)  
 92a -> 96a : 0.106780 (c= -0.32677150)  
 92a -> 99a : 0.014574 (c= -0.12072170)

STATE 15: E= 0.162846 au 4.431 eV 35740.6 cm<sup>-1</sup> <S<sup>2</sup>> = 0.000000

82a -> 93a : 0.014237 (c= 0.11931849)  
 83a -> 93a : 0.069552 (c= -0.26372757)  
 87a -> 93a : 0.030197 (c= 0.17377193)  
 87a -> 94a : 0.245618 (c= 0.49559834)  
 88a -> 94a : 0.055027 (c= -0.23457764)  
 90a -> 94a : 0.015044 (c= 0.12265295)  
 90a -> 96a : 0.013306 (c= 0.11535027)  
 91a -> 95a : 0.041256 (c= 0.20311605)  
 92a -> 96a : 0.024762 (c= -0.15736059)  
 92a -> 97a : 0.394685 (c= 0.62823959)  
 92a -> 98a : 0.011397 (c= 0.10675661)

STATE 16: E= 0.164622 au 4.480 eV 36130.4 cm<sup>-1</sup> <S<sup>2</sup>> = 0.000000

82a -> 93a : 0.155132 (c= -0.39386737)  
 83a -> 93a : 0.648993 (c= 0.80560083)  
 83a -> 94a : 0.024409 (c= 0.15623531)  
 84a -> 93a : 0.034276 (c= 0.18513899)  
 87a -> 93a : 0.031491 (c= 0.17745723)  
 87a -> 94a : 0.012713 (c= 0.11275371)  
 92a -> 97a : 0.030932 (c= 0.17587608)

STATE 17: E= 0.168206 au 4.577 eV 36917.0 cm<sup>-1</sup> <S<sup>2</sup>> = 0.000000

88a -> 94a : 0.066465 (c= -0.25780863)  
 91a -> 95a : 0.571494 (c= -0.75597189)  
 91a -> 96a : 0.087877 (c= -0.29644082)  
 92a -> 97a : 0.064177 (c= 0.25333173)  
 92a -> 98a : 0.117355 (c= -0.34257123)

STATE 18: E= 0.170529 au 4.640 eV 37426.7 cm<sup>-1</sup> <S<sup>2</sup>> = 0.000000

87a -> 94a : 0.171637 (c= -0.41429050)  
 91a -> 95a : 0.163662 (c= 0.40455161)  
 91a -> 96a : 0.014864 (c= 0.12191920)  
 92a -> 97a : 0.079413 (c= 0.28180269)  
 92a -> 98a : 0.514816 (c= -0.71750672)

STATE 19: E= 0.172859 au 4.704 eV 37938.2 cm<sup>-1</sup> <S<sup>2</sup>> = 0.000000

87a -> 94a : 0.338113 (c= -0.58147451)  
 88a -> 94a : 0.012169 (c= -0.11031413)  
 89a -> 95a : 0.068988 (c= -0.26265551)  
 90a -> 95a : 0.105392 (c= 0.32464146)  
 91a -> 96a : 0.037307 (c= -0.19315107)  
 91a -> 98a : 0.015873 (c= 0.12598955)  
 92a -> 97a : 0.060957 (c= 0.24689564)  
 92a -> 98a : 0.238424 (c= 0.48828686)  
 92a -> 99a : 0.029528 (c= -0.17183763)

STATE 20: E= 0.173594 au 4.724 eV 38099.4 cm\*\*<sup>-1</sup> <S\*\*2> = 0.000000

87a -> 94a : 0.028483 (c= 0.16876922)  
 88a -> 95a : 0.017288 (c= -0.13148453)  
 89a -> 95a : 0.387250 (c= -0.62229422)  
 89a -> 96a : 0.070777 (c= -0.26604032)  
 89a -> 97a : 0.011095 (c= -0.10533331)  
 90a -> 95a : 0.258719 (c= -0.50864396)  
 90a -> 96a : 0.021689 (c= -0.14727264)  
 91a -> 95a : 0.017112 (c= 0.13081416)  
 91a -> 96a : 0.038442 (c= -0.19606620)  
 91a -> 97a : 0.036550 (c= -0.19118076)  
 91a -> 98a : 0.058625 (c= 0.24212528)

#### ----- ABSORPTION SPECTRUM VIA TRANSITION ELECTRIC DIPOLE MOMENTS -----

| State | Energy<br>(cm-1) | Wavelength<br>(nm) | fosc<br>(au**2) | T2<br>(au) | TX<br>(au) | TY<br>(au) | TZ       |
|-------|------------------|--------------------|-----------------|------------|------------|------------|----------|
| 1     | 21320.7          | 469.0              | 0.010835612     | 0.16731    | -0.03415   | 0.40052    | 0.07567  |
| 2     | 27720.2          | 360.7              | 0.051481724     | 0.61141    | -0.56175   | -0.26025   | -0.47761 |
| 3     | 29524.7          | 338.7              | 0.152175870     | 1.69682    | 0.88829    | 0.54255    | 0.78321  |
| 4     | 29721.9          | 336.5              | 0.009504681     | 0.10528    | -0.16325   | -0.21205   | -0.18347 |
| 5     | 30443.1          | 328.5              | 0.002708001     | 0.02928    | 0.08953    | 0.14051    | 0.03907  |
| 6     | 31156.7          | 321.0              | 0.012993223     | 0.13729    | 0.25554    | 0.17346    | 0.20470  |
| 7     | 31850.3          | 314.0              | 0.058048021     | 0.60000    | -0.58439   | -0.22272   | -0.45703 |
| 8     | 32018.3          | 312.3              | 0.019938248     | 0.20501    | -0.10933   | -0.40129   | -0.17893 |
| 9     | 32105.8          | 311.5              | 0.015326064     | 0.15715    | 0.20162    | 0.28260    | 0.19142  |
| 10    | 33044.3          | 302.6              | 0.021342589     | 0.21263    | 0.39438    | -0.10025   | 0.21689  |
| 11    | 33300.5          | 300.3              | 0.000025238     | 0.00025    | -0.00986   | 0.00870    | -0.00876 |
| 12    | 33942.6          | 294.6              | 0.008515699     | 0.08259    | 0.06969    | 0.27804    | 0.02072  |
| 13    | 34691.2          | 288.3              | 0.055508883     | 0.52677    | 0.40611    | 0.47891    | 0.36399  |
| 14    | 35629.3          | 280.7              | 0.443776723     | 4.10046    | -1.38567   | -1.02201   | -1.06577 |
| 15    | 35740.6          | 279.8              | 0.036708334     | 0.33813    | -0.27075   | -0.40468   | -0.31789 |
| 16    | 36130.4          | 276.8              | 0.018837733     | 0.17164    | -0.20917   | -0.21397   | -0.28655 |
| 17    | 36917.0          | 270.9              | 0.017617502     | 0.15711    | 0.30294    | -0.21385   | -0.14000 |
| 18    | 37426.7          | 267.2              | 0.017719290     | 0.15586    | -0.32326   | -0.18005   | -0.13766 |
| 19    | 37938.2          | 263.6              | 0.057886654     | 0.50232    | -0.38886   | -0.41462   | -0.42331 |
| 20    | 38099.4          | 262.5              | 0.007297595     | 0.06306    | -0.08397   | 0.23097    | -0.05156 |

#### ----- ABSORPTION SPECTRUM VIA TRANSITION VELOCITY DIPOLE MOMENTS -----

| State | Energy<br>(cm-1) | Wavelength<br>(nm) | fosc<br>(au**2) | P2<br>(au) | PX<br>(au) | PY<br>(au) | PZ       |
|-------|------------------|--------------------|-----------------|------------|------------|------------|----------|
| 1     | 21320.7          | 469.0              | 0.019996950     | 0.00291    | -0.04393   | 0.02751    | -0.01509 |
| 2     | 27720.2          | 360.7              | 0.001552818     | 0.00029    | -0.00777   | 0.00673    | 0.01373  |
| 3     | 29524.7          | 338.7              | 0.008998225     | 0.00182    | -0.02212   | -0.01543   | -0.03299 |
| 4     | 29721.9          | 336.5              | 0.002709653     | 0.00055    | 0.00075    | -0.00119   | 0.02342  |
| 5     | 30443.1          | 328.5              | 0.006275529     | 0.00131    | -0.02995   | -0.02000   | -0.00300 |
| 6     | 31156.7          | 321.0              | 0.000990041     | 0.00021    | -0.01178   | -0.00530   | -0.00664 |
| 7     | 31850.3          | 314.0              | 0.012236281     | 0.00266    | 0.03207    | -0.00068   | 0.04043  |
| 8     | 32018.3          | 312.3              | 0.003337369     | 0.00073    | 0.02250    | 0.00690    | 0.01329  |
| 9     | 32105.8          | 311.5              | 0.001812816     | 0.00040    | -0.00114   | -0.01834   | -0.00775 |
| 10    | 33044.3          | 302.6              | 0.007436346     | 0.00168    | -0.03648   | -0.00397   | -0.01824 |
| 11    | 33300.5          | 300.3              | 0.005211835     | 0.00119    | -0.03315   | -0.00139   | 0.00923  |

|    |         |       |             |         |          |          |          |
|----|---------|-------|-------------|---------|----------|----------|----------|
| 12 | 33942.6 | 294.6 | 0.008660567 | 0.00201 | -0.03053 | -0.03170 | -0.00849 |
| 13 | 34691.2 | 288.3 | 0.004678621 | 0.00111 | -0.00793 | -0.02260 | -0.02314 |
| 14 | 35629.3 | 280.7 | 0.068885915 | 0.01677 | 0.07687  | 0.06843  | 0.07863  |
| 15 | 35740.6 | 279.8 | 0.000865539 | 0.00021 | 0.01145  | 0.00656  | 0.00611  |
| 16 | 36130.4 | 276.8 | 0.015274224 | 0.00377 | -0.00448 | -0.00645 | 0.06091  |
| 17 | 36917.0 | 270.9 | 0.018394657 | 0.00464 | -0.05040 | -0.01520 | 0.04325  |
| 18 | 37426.7 | 267.2 | 0.007131332 | 0.00182 | 0.03712  | 0.01488  | 0.01499  |
| 19 | 37938.2 | 263.6 | 0.004247779 | 0.00110 | 0.02019  | 0.01118  | 0.02385  |
| 20 | 38099.4 | 262.5 | 0.002419075 | 0.00063 | 0.01765  | -0.01532 | 0.00916  |

**Table S7.** Electric properties calculations of **3f**.

The origin for moment calculation is the CENTER OF MASS = (10.368261, 9.432489 5.319525)

-----  
DIPOLE MOMENT  
-----

|                          | X         | Y        | Z        |
|--------------------------|-----------|----------|----------|
| Electronic contribution: | 16.10917  | -7.61403 | 4.96568  |
| Nuclear contribution :   | -16.15544 | 8.40189  | -4.46986 |

-----  
Total Dipole Moment : -0.04627 0.78786 0.49582  
-----

Magnitude (a.u.) : 0.93204  
Magnitude (Debye) : 2.36905

-----  
Rotational spectrum  
-----

Rotational constants in cm-1: 0.012346 0.005076 0.003843  
Rotational constants in MHz : 370.110005 152.166380 115.210831

Dipole components along the rotational axes:  
x,y,z [a.u.]: 0.613008 0.681169 0.170074  
x,y,z [Debye]: 1.558143 1.731393 0.432294

**Table S8.** Crystal data and structure refinement for 6-ethoxy-[1,2,3,4,5]pentathiepine[6,7-a]indolizine (**3a**).

|                                   |                                                                                                                |
|-----------------------------------|----------------------------------------------------------------------------------------------------------------|
| Identification code               | SIV-01-70                                                                                                      |
| Empirical formula                 | C <sub>10</sub> H <sub>9</sub> NS <sub>5</sub> O                                                               |
| Formula weight                    | 319.48                                                                                                         |
| Temperature                       | 170(2) K                                                                                                       |
| Wavelength                        | 0.71073 Å                                                                                                      |
| Crystal system, space group       | Orthorhombic, P b c a                                                                                          |
| Unit cell dimensions              | a = 8.6214(17) Å    alpha = 90 deg.<br>b = 16.866(3) Å    beta = 90 deg.<br>c = 17.750(4) Å    gamma = 90 deg. |
| Volume                            | 2581.1(9) Å <sup>3</sup>                                                                                       |
| Z, calculated value               | 8, 1.644 Mg/m <sup>3</sup>                                                                                     |
| Absorption coefficient            | 0.878 mm <sup>-1</sup>                                                                                         |
| F(000)                            | 1312                                                                                                           |
| Crystal size                      | 0.212 x 0.175 x 0.167 mm                                                                                       |
| Theta range for data collection   | 3.294 to 26.766 deg.                                                                                           |
| Limiting indices                  | -10 ≤ h ≤ 10, -21 ≤ k ≤ 21, -19 ≤ l ≤ 22                                                                       |
| Reflections collected / unique    | 20574 / 2723 [R(int) = 0.0499]                                                                                 |
| Completeness to theta =           | 99.8 %                                                                                                         |
| Absorption correction             | Numerical                                                                                                      |
| Max. and min. transmission        | 0.9933 and 0.8297                                                                                              |
| Refinement method                 | Full-matrix least-squares on F <sup>2</sup>                                                                    |
| Data / restraints / parameters    | 2723 / 0 / 155                                                                                                 |
| Goodness-of-fit on F <sup>2</sup> | 1.032                                                                                                          |
| Final R indices [I > 2σ(I)]       | R1 = 0.0314, wR2 = 0.0789                                                                                      |
| R indices (all data)              | R1 = 0.0430, wR2 = 0.0823                                                                                      |
| Extinction coefficient            | n/a                                                                                                            |
| Largest diff. peak and hole       | 1.027 and -0.610 e.Å <sup>-3</sup>                                                                             |

Table 2. Atomic coordinates ( $\times 10^4$ ) and equivalent isotropic displacement parameters ( $\text{\AA}^2 \times 10^3$ ) for siv0170. U(eq) is defined as one third of the trace of the orthogonalized  $U_{ij}$  tensor.

|       | x       | y       | z       | U(eq) |
|-------|---------|---------|---------|-------|
| S(1)  | 7858(1) | 6719(1) | 4190(1) | 31(1) |
| S(2)  | 6166(1) | 7347(1) | 4753(1) | 35(1) |
| S(3)  | 5142(1) | 8045(1) | 3941(1) | 35(1) |
| S(4)  | 3719(1) | 7293(1) | 3355(1) | 36(1) |
| S(5)  | 5192(1) | 6649(1) | 2669(1) | 30(1) |
| O(1)  | 7901(2) | 4807(1) | 4661(1) | 29(1) |
| N(1)  | 6064(2) | 4640(1) | 3703(1) | 23(1) |
| C(1)  | 7004(2) | 5129(1) | 4125(1) | 24(1) |
| C(2)  | 6862(2) | 5891(1) | 3850(1) | 24(1) |
| C(3)  | 5781(2) | 5871(1) | 3238(1) | 25(1) |
| C(4)  | 5284(2) | 5092(1) | 3158(1) | 23(1) |
| C(5)  | 4191(3) | 4698(1) | 2692(1) | 28(1) |
| C(6)  | 3933(3) | 3908(1) | 2790(1) | 31(1) |
| C(7)  | 4766(3) | 3476(1) | 3345(1) | 30(1) |
| C(8)  | 5814(3) | 3836(1) | 3792(1) | 27(1) |
| C(9)  | 7365(4) | 4889(2) | 5417(2) | 56(1) |
| C(10) | 8525(3) | 4543(2) | 5939(1) | 37(1) |

Table 3. Bond lengths [Å] and angles [deg] for siv0170.

|                |            |
|----------------|------------|
| S(1)-C(2)      | 1.748(2)   |
| S(1)-S(2)      | 2.0613(9)  |
| S(2)-S(3)      | 2.0599(9)  |
| S(3)-S(4)      | 2.0483(9)  |
| S(4)-S(5)      | 2.0672(9)  |
| S(5)-C(3)      | 1.732(2)   |
| O(1)-C(1)      | 1.341(3)   |
| O(1)-C(9)      | 1.427(3)   |
| N(1)-C(1)      | 1.378(3)   |
| N(1)-C(8)      | 1.382(3)   |
| N(1)-C(4)      | 1.404(3)   |
| C(1)-C(2)      | 1.379(3)   |
| C(2)-C(3)      | 1.431(3)   |
| C(3)-C(4)      | 1.390(3)   |
| C(4)-C(5)      | 1.419(3)   |
| C(5)-C(6)      | 1.361(3)   |
| C(5)-H(5)      | 0.9500     |
| C(6)-C(7)      | 1.421(3)   |
| C(6)-H(6)      | 0.9500     |
| C(7)-C(8)      | 1.347(3)   |
| C(7)-H(7)      | 0.9500     |
| C(8)-H(8)      | 0.9500     |
| C(9)-C(10)     | 1.483(4)   |
| C(9)-H(9A)     | 0.9900     |
| C(9)-H(9B)     | 0.9900     |
| C(10)-H(10A)   | 0.9800     |
| C(10)-H(10B)   | 0.9800     |
| C(10)-H(10C)   | 0.9800     |
|                |            |
| C(2)-S(1)-S(2) | 103.29(8)  |
| S(3)-S(2)-S(1) | 104.91(4)  |
| S(4)-S(3)-S(2) | 104.93(4)  |
| S(3)-S(4)-S(5) | 104.86(4)  |
| C(3)-S(5)-S(4) | 103.57(8)  |
| C(1)-O(1)-C(9) | 116.18(18) |
| C(1)-N(1)-C(8) | 128.15(18) |
| C(1)-N(1)-C(4) | 109.30(16) |
| C(8)-N(1)-C(4) | 122.49(18) |
| O(1)-C(1)-N(1) | 118.75(18) |
| O(1)-C(1)-C(2) | 132.82(19) |
| N(1)-C(1)-C(2) | 108.30(18) |
| C(1)-C(2)-C(3) | 107.74(18) |
| C(1)-C(2)-S(1) | 125.39(17) |
| C(3)-C(2)-S(1) | 126.87(16) |
| C(4)-C(3)-C(2) | 107.48(18) |
| C(4)-C(3)-S(5) | 124.47(17) |
| C(2)-C(3)-S(5) | 128.03(16) |
| C(3)-C(4)-N(1) | 107.18(18) |
| C(3)-C(4)-C(5) | 135.0(2)   |
| N(1)-C(4)-C(5) | 117.74(18) |
| C(6)-C(5)-C(4) | 119.4(2)   |
| C(6)-C(5)-H(5) | 120.3      |
| C(4)-C(5)-H(5) | 120.3      |
| C(5)-C(6)-C(7) | 120.6(2)   |
| C(5)-C(6)-H(6) | 119.7      |

|                     |          |
|---------------------|----------|
| C(7)-C(6)-H(6)      | 119.7    |
| C(8)-C(7)-C(6)      | 121.0(2) |
| C(8)-C(7)-H(7)      | 119.5    |
| C(6)-C(7)-H(7)      | 119.5    |
| C(7)-C(8)-N(1)      | 118.7(2) |
| C(7)-C(8)-H(8)      | 120.7    |
| N(1)-C(8)-H(8)      | 120.7    |
| O(1)-C(9)-C(10)     | 109.3(2) |
| O(1)-C(9)-H(9A)     | 109.8    |
| C(10)-C(9)-H(9A)    | 109.8    |
| O(1)-C(9)-H(9B)     | 109.8    |
| C(10)-C(9)-H(9B)    | 109.8    |
| H(9A)-C(9)-H(9B)    | 108.3    |
| C(9)-C(10)-H(10A)   | 109.5    |
| C(9)-C(10)-H(10B)   | 109.5    |
| H(10A)-C(10)-H(10B) | 109.5    |
| C(9)-C(10)-H(10C)   | 109.5    |
| H(10A)-C(10)-H(10C) | 109.5    |
| H(10B)-C(10)-H(10C) | 109.5    |

---

Symmetry transformations used to generate equivalent atoms:

Table 4. Anisotropic displacement parameters ( $\text{\AA}^2 \times 10^3$ ) for siv0170.

The anisotropic displacement factor exponent takes the form:

$$-2 \pi^2 [h^2 a^{*2} U_{11} + \dots + 2 h k a^* b^* U_{12}]$$

---

|       | U11   | U22   | U33   | U23   | U13   | U12   |
|-------|-------|-------|-------|-------|-------|-------|
| <hr/> |       |       |       |       |       |       |
| S(1)  | 29(1) | 26(1) | 37(1) | -2(1) | -4(1) | -3(1) |
| S(2)  | 48(1) | 31(1) | 27(1) | -2(1) | 3(1)  | 0(1)  |
| S(3)  | 43(1) | 26(1) | 38(1) | -1(1) | 4(1)  | 4(1)  |
| S(4)  | 31(1) | 31(1) | 45(1) | 1(1)  | 0(1)  | 6(1)  |
| S(5)  | 39(1) | 26(1) | 25(1) | 5(1)  | -1(1) | 3(1)  |
| O(1)  | 32(1) | 32(1) | 24(1) | 1(1)  | -4(1) | 8(1)  |
| N(1)  | 25(1) | 21(1) | 23(1) | 2(1)  | 1(1)  | 0(1)  |
| C(1)  | 22(1) | 26(1) | 23(1) | 0(1)  | 0(1)  | 2(1)  |
| C(2)  | 25(1) | 23(1) | 25(1) | 0(1)  | 1(1)  | -2(1) |
| C(3)  | 26(1) | 24(1) | 24(1) | 2(1)  | 1(1)  | 1(1)  |
| C(4)  | 23(1) | 26(1) | 21(1) | 0(1)  | 2(1)  | 2(1)  |
| C(5)  | 29(1) | 32(1) | 22(1) | -1(1) | -1(1) | -1(1) |
| C(6)  | 33(1) | 32(1) | 28(1) | -6(1) | 0(1)  | -6(1) |
| C(7)  | 36(1) | 23(1) | 33(1) | -2(1) | 5(1)  | -3(1) |
| C(8)  | 31(1) | 21(1) | 29(1) | 1(1)  | 5(1)  | 2(1)  |
| C(9)  | 68(2) | 73(2) | 28(1) | 0(1)  | 1(1)  | 36(2) |
| C(10) | 33(1) | 51(2) | 27(1) | 6(1)  | 0(1)  | 6(1)  |

---

Table 5. Hydrogen bonds for siv0170 [Å and deg.].

| Nr | Typ | Res Donor --- H...Acceptor [ ARU ] | D - H | H...A | D...A    | D - H...A |
|----|-----|------------------------------------|-------|-------|----------|-----------|
| 1  | 1   | C(10) --H(10C) ..O(1) [ 5555.01]   | 0.98  | 2.54  | 3.439(3) | 152       |

Translation of ARU-Code to CIF and Equivalent Position Code

=====

[ 5555.] = -x,-y,-z

**Table S9.** Crystal data and structure refinement for 6-ethoxy-9-fluoro-[1,2,3,4,5]pentathiepine[6,7-a]indolizine (**3b**).

|                                   |                                                                                                                                    |
|-----------------------------------|------------------------------------------------------------------------------------------------------------------------------------|
| Identification code               | RT105                                                                                                                              |
| Empirical formula                 | C <sub>10</sub> H <sub>8</sub> NS <sub>5</sub> OF                                                                                  |
| Formula weight                    | 337.47                                                                                                                             |
| Temperature                       | 170(2) K                                                                                                                           |
| Wavelength                        | 0.71073 Å                                                                                                                          |
| Crystal system, space group       | Triclinic, P -1                                                                                                                    |
| Unit cell dimensions              | a = 8.4433(17) Å    alpha = 96.08(3) deg.<br>b = 8.5239(17) Å    beta = 96.15(3) deg.<br>c = 9.4614(19) Å    gamma = 99.51(3) deg. |
| Volume                            | 662.4(2) Å <sup>3</sup>                                                                                                            |
| Z, calculated value               | 2, 1.692 Mg/m <sup>3</sup>                                                                                                         |
| Absorption coefficient            | 0.871 mm <sup>-1</sup>                                                                                                             |
| F(000)                            | 344                                                                                                                                |
| Crystal size                      | 0.137 x 0.135 x 0.092 mm                                                                                                           |
| Theta range for data collection   | 2.182 to 29.471 deg.                                                                                                               |
| Limiting indices                  | -11<=h<=11, -11<=k<=11, -13<=l<=11                                                                                                 |
| Reflections collected / unique    | 7509 / 3639 [R(int) = 0.0289]                                                                                                      |
| Completeness to theta =           | 25.242    99.7 %                                                                                                                   |
| Absorption correction             | Numerical                                                                                                                          |
| Max. and min. transmission        | 0.9534 and 0.8334                                                                                                                  |
| Refinement method                 | Full-matrix least-squares on F <sup>2</sup>                                                                                        |
| Data / restraints / parameters    | 3639 / 0 / 164                                                                                                                     |
| Goodness-of-fit on F <sup>2</sup> | 1.052                                                                                                                              |
| Final R indices [I>2sigma(I)]     | R1 = 0.0359, wR2 = 0.0844                                                                                                          |

|                             |                                    |
|-----------------------------|------------------------------------|
| R indices (all data)        | R1 = 0.0535, wR2 = 0.0942          |
| Extinction coefficient      | n/a                                |
| Largest diff. peak and hole | 0.411 and -0.399 e.Å <sup>-3</sup> |

Atomic coordinates ( x 10<sup>4</sup>) and equivalent isotropic

displacement parameters (Å<sup>2</sup> x 10<sup>3</sup>) for RT105.

U(eq) is defined as one third of the trace of the orthogonalized

Uij tensor.

|       | x       | y       | z       | U(eq) |
|-------|---------|---------|---------|-------|
| S(1)  | 2250(1) | 4047(1) | 2532(1) | 34(1) |
| S(2)  | 2424(1) | 4473(1) | 4733(1) | 39(1) |
| S(3)  | 1878(1) | 6717(1) | 5123(1) | 40(1) |
| S(4)  | 3965(1) | 8224(1) | 4890(1) | 35(1) |
| S(5)  | 3959(1) | 8161(1) | 2708(1) | 31(1) |
| F(1)  | 9200(2) | 2479(2) | 162(2)  | 41(1) |
| O(1)  | 7511(2) | 7853(2) | 1663(2) | 31(1) |
| N(1)  | 6642(2) | 5067(2) | 1482(2) | 26(1) |
| C(1)  | 7974(3) | 4577(3) | 967(2)  | 30(1) |
| C(2)  | 7925(3) | 2995(3) | 694(2)  | 32(1) |
| C(3)  | 6619(3) | 1825(3) | 925(2)  | 35(1) |
| C(4)  | 5316(3) | 2322(3) | 1426(2) | 31(1) |
| C(5)  | 5285(3) | 3979(2) | 1707(2) | 27(1) |
| C(6)  | 4166(3) | 4867(3) | 2178(2) | 28(1) |
| C(7)  | 4860(3) | 6513(2) | 2250(2) | 26(1) |
| C(8)  | 6384(3) | 6600(2) | 1829(2) | 27(1) |
| C(9)  | 8544(4) | 8558(4) | 2955(3) | 63(1) |
| C(10) | 9823(3) | 9840(3) | 2682(3) | 41(1) |

Bond lengths [Å] and angles [deg] for RT105.

---

|                |            |
|----------------|------------|
| S(1)-C(6)      | 1.735(2)   |
| S(1)-S(2)      | 2.0609(9)  |
| S(2)-S(3)      | 2.0462(11) |
| S(3)-S(4)      | 2.0485(11) |
| S(4)-S(5)      | 2.0596(9)  |
| S(5)-C(7)      | 1.742(2)   |
| F(1)-C(2)      | 1.354(3)   |
| O(1)-C(8)      | 1.342(2)   |
| O(1)-C(9)      | 1.435(3)   |
| N(1)-C(8)      | 1.372(3)   |
| N(1)-C(1)      | 1.380(3)   |
| N(1)-C(5)      | 1.401(3)   |
| C(1)-C(2)      | 1.338(3)   |
| C(2)-C(3)      | 1.412(3)   |
| C(3)-C(4)      | 1.355(3)   |
| C(4)-C(5)      | 1.415(3)   |
| C(5)-C(6)      | 1.386(3)   |
| C(6)-C(7)      | 1.419(3)   |
| C(7)-C(8)      | 1.380(3)   |
| C(9)-C(10)     | 1.468(3)   |
|                |            |
| C(6)-S(1)-S(2) | 103.25(8)  |
| S(3)-S(2)-S(1) | 104.23(5)  |
| S(2)-S(3)-S(4) | 104.05(4)  |
| S(3)-S(4)-S(5) | 104.62(5)  |
| C(7)-S(5)-S(4) | 103.36(8)  |
| C(8)-O(1)-C(9) | 114.29(18) |
| C(8)-N(1)-C(1) | 128.47(18) |
| C(8)-N(1)-C(5) | 109.11(18) |
| C(1)-N(1)-C(5) | 122.41(18) |
| C(2)-C(1)-N(1) | 117.0(2)   |
| C(1)-C(2)-F(1) | 118.3(2)   |
| C(1)-C(2)-C(3) | 124.0(2)   |
| F(1)-C(2)-C(3) | 117.7(2)   |
| C(4)-C(3)-C(2) | 118.4(2)   |
| C(3)-C(4)-C(5) | 120.1(2)   |
| C(6)-C(5)-N(1) | 107.32(18) |

|                 |            |
|-----------------|------------|
| C(6)-C(5)-C(4)  | 134.6(2)   |
| N(1)-C(5)-C(4)  | 118.0(2)   |
| C(5)-C(6)-C(7)  | 107.51(19) |
| C(5)-C(6)-S(1)  | 124.42(16) |
| C(7)-C(6)-S(1)  | 128.03(18) |
| C(8)-C(7)-C(6)  | 107.82(19) |
| C(8)-C(7)-S(5)  | 124.80(16) |
| C(6)-C(7)-S(5)  | 127.33(17) |
| O(1)-C(8)-N(1)  | 119.85(19) |
| O(1)-C(8)-C(7)  | 131.8(2)   |
| N(1)-C(8)-C(7)  | 108.23(18) |
| O(1)-C(9)-C(10) | 111.6(2)   |

---

Symmetry transformations used to generate equivalent atoms:

Anisotropic displacement parameters ( $\text{\AA}^2 \times 10^3$ ) for RT105.

The anisotropic displacement factor exponent takes the form:

$$-2 \pi^2 [ h^2 a^{*2} U_{11} + \dots + 2 h k a^* b^* U_{12} ]$$

---

|       | U11   | U22   | U33   | U23   | U13   | U12    |
|-------|-------|-------|-------|-------|-------|--------|
| <hr/> |       |       |       |       |       |        |
| S(1)  | 27(1) | 36(1) | 35(1) | 4(1)  | 1(1)  | -5(1)  |
| S(2)  | 38(1) | 44(1) | 35(1) | 14(1) | 7(1)  | -3(1)  |
| S(3)  | 32(1) | 51(1) | 36(1) | 5(1)  | 11(1) | 2(1)   |
| S(4)  | 36(1) | 38(1) | 28(1) | -1(1) | 6(1)  | 1(1)   |
| S(5)  | 36(1) | 28(1) | 30(1) | 5(1)  | 6(1)  | 8(1)   |
| F(1)  | 39(1) | 43(1) | 42(1) | -2(1) | 5(1)  | 16(1)  |
| O(1)  | 33(1) | 27(1) | 30(1) | 6(1)  | 6(1)  | -4(1)  |
| N(1)  | 28(1) | 25(1) | 24(1) | 3(1)  | 3(1)  | 2(1)   |
| C(1)  | 30(1) | 32(1) | 26(1) | 4(1)  | 3(1)  | 5(1)   |
| C(2)  | 33(1) | 36(1) | 28(1) | 1(1)  | 0(1)  | 10(1)  |
| C(3)  | 43(1) | 28(1) | 31(1) | 0(1)  | -4(1) | 8(1)   |
| C(4)  | 36(1) | 25(1) | 29(1) | 5(1)  | -2(1) | 0(1)   |
| C(5)  | 29(1) | 26(1) | 23(1) | 3(1)  | -1(1) | 0(1)   |
| C(6)  | 28(1) | 27(1) | 26(1) | 5(1)  | 1(1)  | 0(1)   |
| C(7)  | 30(1) | 25(1) | 24(1) | 4(1)  | 2(1)  | 3(1)   |
| C(8)  | 30(1) | 24(1) | 25(1) | 5(1)  | 4(1)  | 1(1)   |
| C(9)  | 66(2) | 65(2) | 39(2) | 13(1) | -9(1) | -34(2) |
| C(10) | 37(1) | 34(1) | 48(1) | 5(1)  | 2(1)  | -2(1)  |

---

Table 5. Torsion angles [deg] for RT105.

|                      |             |
|----------------------|-------------|
| C(8)-N(1)-C(1)-C(2)  | -179.3(2)   |
| C(5)-N(1)-C(1)-C(2)  | -0.5(3)     |
| N(1)-C(1)-C(2)-F(1)  | 178.73(18)  |
| N(1)-C(1)-C(2)-C(3)  | -1.1(3)     |
| C(1)-C(2)-C(3)-C(4)  | 1.4(3)      |
| F(1)-C(2)-C(3)-C(4)  | -178.46(19) |
| C(2)-C(3)-C(4)-C(5)  | -0.1(3)     |
| C(8)-N(1)-C(5)-C(6)  | 1.0(2)      |
| C(1)-N(1)-C(5)-C(6)  | -178.06(18) |
| C(8)-N(1)-C(5)-C(4)  | -179.27(18) |
| C(1)-N(1)-C(5)-C(4)  | 1.7(3)      |
| C(3)-C(4)-C(5)-C(6)  | 178.3(2)    |
| C(3)-C(4)-C(5)-N(1)  | -1.4(3)     |
| N(1)-C(5)-C(6)-C(7)  | -0.5(2)     |
| C(4)-C(5)-C(6)-C(7)  | 179.9(2)    |
| N(1)-C(5)-C(6)-S(1)  | 177.34(14)  |
| C(4)-C(5)-C(6)-S(1)  | -2.3(4)     |
| S(2)-S(1)-C(6)-C(5)  | 109.15(18)  |
| S(2)-S(1)-C(6)-C(7)  | -73.5(2)    |
| C(5)-C(6)-C(7)-C(8)  | -0.2(2)     |
| S(1)-C(6)-C(7)-C(8)  | -177.92(16) |
| C(5)-C(6)-C(7)-S(5)  | 177.28(15)  |
| S(1)-C(6)-C(7)-S(5)  | -0.4(3)     |
| S(4)-S(5)-C(7)-C(8)  | -109.22(18) |
| S(4)-S(5)-C(7)-C(6)  | 73.70(19)   |
| C(9)-O(1)-C(8)-N(1)  | -98.6(3)    |
| C(9)-O(1)-C(8)-C(7)  | 85.0(3)     |
| C(1)-N(1)-C(8)-O(1)  | 0.7(3)      |
| C(5)-N(1)-C(8)-O(1)  | -178.25(17) |
| C(1)-N(1)-C(8)-C(7)  | 177.85(19)  |
| C(5)-N(1)-C(8)-C(7)  | -1.1(2)     |
| C(6)-C(7)-C(8)-O(1)  | 177.5(2)    |
| S(5)-C(7)-C(8)-O(1)  | -0.1(3)     |
| C(6)-C(7)-C(8)-N(1)  | 0.8(2)      |
| S(5)-C(7)-C(8)-N(1)  | -176.74(14) |
| C(8)-O(1)-C(9)-C(10) | 175.7(2)    |

**Table S10.** Crystal data and structure refinement for 6-ethoxy-9-chloro-[1,2,3,4,5]pentathiepine[6,7-a]indolizine (**3c**).

|                                   |                                                                                                                      |
|-----------------------------------|----------------------------------------------------------------------------------------------------------------------|
| Identification code               | RT143                                                                                                                |
| Empirical formula                 | C <sub>10</sub> H <sub>8</sub> NCIS <sub>5</sub> O                                                                   |
| Formula weight                    | 353.92                                                                                                               |
| Temperature                       | 100(2) K                                                                                                             |
| Wavelength                        | 1.54184 Å                                                                                                            |
| Crystal system, space group       | Orthorhombic, P c a 21                                                                                               |
| Unit cell dimensions              | a = 19.22720(10) Å    alpha = 90 deg.<br>b = 8.61740(10) Å    beta = 90 deg.<br>c = 8.20880(10) Å    gamma = 90 deg. |
| Volume                            | 1360.10(2) Å <sup>3</sup>                                                                                            |
| Z, calculated value               | 4, 1.728 Mg/m <sup>3</sup>                                                                                           |
| Absorption coefficient            | 9.550 mm <sup>-1</sup>                                                                                               |
| F(000)                            | 720                                                                                                                  |
| Crystal size                      | 0.205 x 0.090 x 0.063 mm                                                                                             |
| Theta range for data collection   | 4.600 to 80.026 deg.                                                                                                 |
| Limiting indices                  | -24 ≤ h ≤ 24, -11 ≤ k ≤ 10, -10 ≤ l ≤ 10                                                                             |
| Reflections collected / unique    | 47449 / 2962 [R(int) = 0.0581]                                                                                       |
| Completeness to theta =           | 0.0 %                                                                                                                |
| Absorption correction             | Numerical                                                                                                            |
| Max. and min. transmission        | 1.07 and 0.45                                                                                                        |
| Refinement method                 | Full-matrix least-squares on F <sup>2</sup>                                                                          |
| Data / restraints / parameters    | 2962 / 1 / 164                                                                                                       |
| Goodness-of-fit on F <sup>2</sup> | 1.065                                                                                                                |
| Final R indices [I > 2σ(I)]       | R1 = 0.0241, wR2 = 0.0657                                                                                            |
| R indices (all data)              | R1 = 0.0243, wR2 = 0.0663                                                                                            |
| Absolute structure parameter      | -0.002(9)                                                                                                            |
| Extinction coefficient            | n/a                                                                                                                  |
| Largest diff. peak and hole       | 0.352 and -0.276 e.Å <sup>-3</sup>                                                                                   |

Table 2. Atomic coordinates ( × 10<sup>4</sup>) and equivalent isotropic displacement parameters (Å<sup>2</sup> × 10<sup>3</sup>) for rt143.  
U(eq) is defined as one third of the trace of the orthogonalized U<sub>ij</sub> tensor.

|       | x       | y       | z       | U(eq) |
|-------|---------|---------|---------|-------|
| Cl(1) | 7905(1) | 9185(1) | 3142(1) | 23(1) |
| S(1)  | 4828(1) | 4585(1) | 4629(1) | 17(1) |
| S(2)  | 4741(1) | 2687(1) | 3096(1) | 19(1) |
| S(3)  | 4742(1) | 803(1)  | 4657(1) | 20(1) |
| S(4)  | 5755(1) | 543(1)  | 5417(1) | 19(1) |
| S(5)  | 5892(1) | 2238(1) | 7171(1) | 16(1) |
| O(1)  | 7406(1) | 3991(2) | 6689(3) | 18(1) |
| N(1)  | 6810(1) | 5717(3) | 4950(3) | 16(1) |
| C(1)  | 5719(1) | 4771(3) | 4989(3) | 15(1) |
| C(2)  | 6146(2) | 3837(3) | 6007(4) | 16(1) |
| C(3)  | 6813(2) | 4435(3) | 5955(4) | 16(1) |
| C(4)  | 6140(1) | 5930(3) | 4316(4) | 15(1) |
| C(5)  | 6037(2) | 7163(3) | 3205(4) | 16(1) |
| C(6)  | 6574(2) | 8125(3) | 2822(4) | 18(1) |
| C(7)  | 7239(2) | 7887(4) | 3565(4) | 17(1) |
| C(8)  | 7360(1) | 6694(3) | 4597(4) | 18(1) |
| C(9)  | 7777(2) | 2791(4) | 5762(4) | 20(1) |
| C(10) | 8461(2) | 2538(4) | 6604(4) | 22(1) |

Table 3. Bond lengths [Å] and angles [deg] for rt143.

---

|                 |            |
|-----------------|------------|
| Cl(1)-C(7)      | 1.736(3)   |
| S(1)-C(1)       | 1.746(3)   |
| S(1)-S(2)       | 2.0711(10) |
| S(2)-S(3)       | 2.0683(10) |
| S(3)-S(4)       | 2.0568(11) |
| S(4)-S(5)       | 2.0676(10) |
| S(5)-C(2)       | 1.747(3)   |
| O(1)-C(3)       | 1.347(4)   |
| O(1)-C(9)       | 1.469(4)   |
| N(1)-C(3)       | 1.378(4)   |
| N(1)-C(8)       | 1.383(4)   |
| N(1)-C(4)       | 1.401(4)   |
| C(1)-C(4)       | 1.400(4)   |
| C(1)-C(2)       | 1.421(4)   |
| C(2)-C(3)       | 1.383(4)   |
| C(4)-C(5)       | 1.414(4)   |
| C(5)-C(6)       | 1.361(4)   |
| C(6)-C(7)       | 1.432(4)   |
| C(7)-C(8)       | 1.352(5)   |
| C(9)-C(10)      | 1.501(4)   |
|                 |            |
| C(1)-S(1)-S(2)  | 104.72(10) |
| S(3)-S(2)-S(1)  | 104.10(4)  |
| S(4)-S(3)-S(2)  | 105.94(4)  |
| S(3)-S(4)-S(5)  | 104.75(4)  |
| C(2)-S(5)-S(4)  | 102.23(11) |
| C(3)-O(1)-C(9)  | 112.3(2)   |
| C(3)-N(1)-C(8)  | 127.7(3)   |
| C(3)-N(1)-C(4)  | 109.3(2)   |
| C(8)-N(1)-C(4)  | 123.0(3)   |
| C(4)-C(1)-C(2)  | 107.5(2)   |
| C(4)-C(1)-S(1)  | 124.5(2)   |
| C(2)-C(1)-S(1)  | 127.9(2)   |
| C(3)-C(2)-C(1)  | 107.9(3)   |
| C(3)-C(2)-S(5)  | 124.8(2)   |
| C(1)-C(2)-S(5)  | 127.4(2)   |
| O(1)-C(3)-N(1)  | 119.9(3)   |
| O(1)-C(3)-C(2)  | 131.8(3)   |
| N(1)-C(3)-C(2)  | 108.3(3)   |
| C(1)-C(4)-N(1)  | 107.0(3)   |
| C(1)-C(4)-C(5)  | 135.2(3)   |
| N(1)-C(4)-C(5)  | 117.9(3)   |
| C(6)-C(5)-C(4)  | 120.0(3)   |
| C(5)-C(6)-C(7)  | 119.5(3)   |
| C(8)-C(7)-C(6)  | 122.0(3)   |
| C(8)-C(7)-Cl(1) | 119.2(2)   |
| C(6)-C(7)-Cl(1) | 118.8(2)   |
| C(7)-C(8)-N(1)  | 117.6(3)   |
| O(1)-C(9)-C(10) | 106.8(2)   |

---

Symmetry transformations used to generate equivalent atoms:

Table 4. Anisotropic displacement parameters ( $\text{\AA}^2 \times 10^3$ ) for rt143.

The anisotropic displacement factor exponent takes the form:

$$-2 \pi^2 [ h^2 a^{*2} U_{11} + \dots + 2 h k a^* b^* U_{12} ]$$

|       | U11   | U22   | U33   | U23   | U13   | U12   |
|-------|-------|-------|-------|-------|-------|-------|
| Cl(1) | 19(1) | 25(1) | 26(1) | 4(1)  | 1(1)  | -7(1) |
| S(1)  | 12(1) | 19(1) | 20(1) | 1(1)  | -1(1) | 0(1)  |
| S(2)  | 19(1) | 22(1) | 17(1) | 1(1)  | -3(1) | -4(1) |
| S(3)  | 21(1) | 20(1) | 18(1) | 0(1)  | 0(1)  | -5(1) |
| S(4)  | 21(1) | 17(1) | 17(1) | -1(1) | 3(1)  | 1(1)  |
| S(5)  | 16(1) | 18(1) | 14(1) | 1(1)  | 1(1)  | 0(1)  |
| O(1)  | 14(1) | 23(1) | 16(1) | 0(1)  | -4(1) | 2(1)  |
| N(1)  | 15(1) | 16(1) | 16(1) | 0(1)  | -1(1) | 0(1)  |
| C(1)  | 13(1) | 16(1) | 16(2) | -2(1) | 1(1)  | 1(1)  |
| C(2)  | 16(1) | 18(1) | 15(1) | -1(1) | 0(1)  | -1(1) |
| C(3)  | 15(1) | 19(1) | 13(1) | -1(1) | -1(1) | 1(1)  |
| C(4)  | 13(1) | 19(1) | 14(1) | -3(1) | -1(1) | 1(1)  |
| C(5)  | 15(1) | 18(1) | 16(1) | -3(1) | -2(1) | 1(1)  |
| C(6)  | 20(1) | 17(1) | 16(1) | 1(1)  | 1(1)  | 2(1)  |
| C(7)  | 15(1) | 19(1) | 18(1) | -3(1) | 3(1)  | -3(1) |
| C(8)  | 14(1) | 21(1) | 19(1) | -5(1) | -1(1) | -2(1) |
| C(9)  | 19(1) | 24(2) | 17(1) | -1(1) | -1(1) | 3(1)  |
| C(10) | 18(2) | 27(2) | 22(2) | -1(1) | -3(1) | 5(1)  |

Table 5. Torsion angles [deg] for rt143.

|                      |           |
|----------------------|-----------|
| S(2)-S(1)-C(1)-C(4)  | 106.5(2)  |
| S(2)-S(1)-C(1)-C(2)  | -74.8(3)  |
| C(4)-C(1)-C(2)-C(3)  | 0.5(3)    |
| S(1)-C(1)-C(2)-C(3)  | -178.4(2) |
| C(4)-C(1)-C(2)-S(5)  | 179.1(2)  |
| S(1)-C(1)-C(2)-S(5)  | 0.3(4)    |
| S(4)-S(5)-C(2)-C(3)  | -107.3(3) |
| S(4)-S(5)-C(2)-C(1)  | 74.2(3)   |
| C(9)-O(1)-C(3)-N(1)  | -94.8(3)  |
| C(9)-O(1)-C(3)-C(2)  | 85.9(4)   |
| C(8)-N(1)-C(3)-O(1)  | -1.8(4)   |
| C(4)-N(1)-C(3)-O(1)  | 179.1(3)  |
| C(8)-N(1)-C(3)-C(2)  | 177.7(3)  |
| C(4)-N(1)-C(3)-C(2)  | -1.4(3)   |
| C(1)-C(2)-C(3)-O(1)  | 180.0(3)  |
| S(5)-C(2)-C(3)-O(1)  | 1.2(5)    |
| C(1)-C(2)-C(3)-N(1)  | 0.6(3)    |
| S(5)-C(2)-C(3)-N(1)  | -178.2(2) |
| C(2)-C(1)-C(4)-N(1)  | -1.3(3)   |
| S(1)-C(1)-C(4)-N(1)  | 177.6(2)  |
| C(2)-C(1)-C(4)-C(5)  | 178.1(3)  |
| S(1)-C(1)-C(4)-C(5)  | -3.1(5)   |
| C(3)-N(1)-C(4)-C(1)  | 1.6(3)    |
| C(8)-N(1)-C(4)-C(1)  | -177.5(3) |
| C(3)-N(1)-C(4)-C(5)  | -177.8(3) |
| C(8)-N(1)-C(4)-C(5)  | 3.0(4)    |
| C(1)-C(4)-C(5)-C(6)  | 178.7(3)  |
| N(1)-C(4)-C(5)-C(6)  | -2.0(4)   |
| C(4)-C(5)-C(6)-C(7)  | -0.6(4)   |
| C(5)-C(6)-C(7)-C(8)  | 2.5(5)    |
| C(5)-C(6)-C(7)-Cl(1) | -176.7(2) |
| C(6)-C(7)-C(8)-N(1)  | -1.5(5)   |
| Cl(1)-C(7)-C(8)-N(1) | 177.7(2)  |
| C(3)-N(1)-C(8)-C(7)  | 179.8(3)  |
| C(4)-N(1)-C(8)-C(7)  | -1.3(4)   |
| C(3)-O(1)-C(9)-C(10) | 173.6(3)  |

Symmetry transformations used to generate equivalent atoms:

Table 6. Hydrogen bonds for rt143 [Å and deg.].

| D-H...A             | d(D-H) | d(H...A) | d(D...A) | <(DHA) |
|---------------------|--------|----------|----------|--------|
| C(9)-H(9A)...O(1)#1 | 0.99   | 2.57     | 3.518(4) | 160.3  |
| C(5)-H(5)...S(5)#2  | 0.95   | 2.92     | 3.839(3) | 164.5  |
| C(5)-H(5)...S(5)#2  | 0.95   | 2.92     | 3.839(3) | 164.5  |
| C(9)-H(9A)...O(1)#1 | 0.99   | 2.57     | 3.518(4) | 160.3  |

Symmetry transformations used to generate equivalent atoms:

#1 -x+3/2,y,z-1/2 #2 -x+1,-y+1,z-1/2

**Table S11.** Crystal data and structure refinement for 6-ethoxy-9-bromo-[1,2,3,4,5]pentathiepino[6,7-a]indolizine (**3d**).

|                                   |                                                                                                                 |
|-----------------------------------|-----------------------------------------------------------------------------------------------------------------|
| Identification code               | FW-02-01                                                                                                        |
| Empirical formula                 | C <sub>10</sub> H <sub>8</sub> NBrS <sub>5</sub> O                                                              |
| Formula weight                    | 398.38                                                                                                          |
| Temperature                       | 170(2) K                                                                                                        |
| Wavelength                        | 0.71073 Å                                                                                                       |
| Crystal system, space group       | Orthorhombic, P c a 21                                                                                          |
| Unit cell dimensions              | a = 19.380(4) Å    alpha = 90 deg.<br>b = 8.7056(17) Å    beta = 90 deg.<br>c = 8.2131(16) Å    gamma = 90 deg. |
| Volume                            | 1385.6(5) Å <sup>3</sup>                                                                                        |
| Z, calculated value               | 4, 1.910 Mg/m <sup>3</sup>                                                                                      |
| Absorption coefficient            | 3.704 mm <sup>-1</sup>                                                                                          |
| F(000)                            | 792                                                                                                             |
| Crystal size                      | 0.126 x 0.092 x 0.073 mm                                                                                        |
| Theta range for data collection   | 3.146 to 29.488 deg.                                                                                            |
| Limiting indices                  | -26 ≤ h ≤ 26, -12 ≤ k ≤ 11, -9 ≤ l ≤ 11                                                                         |
| Reflections collected / unique    | 14351 / 3493 [R(int) = 0.0923]                                                                                  |
| Completeness to theta =           | 25.242    99.7 %                                                                                                |
| Absorption correction             | Numerical                                                                                                       |
| Max. and min. transmission        | 0.7978 and 0.6823                                                                                               |
| Refinement method                 | Full-matrix least-squares on F <sup>2</sup>                                                                     |
| Data / restraints / parameters    | 3493 / 1 / 165                                                                                                  |
| Goodness-of-fit on F <sup>2</sup> | 0.996                                                                                                           |
| Final R indices [I > 2σ(I)]       | R1 = 0.0456, wR2 = 0.0913                                                                                       |
| R indices (all data)              | R1 = 0.0932, wR2 = 0.1066                                                                                       |
| Absolute structure parameter      | 0.085(18)                                                                                                       |
| Extinction coefficient            | n/a                                                                                                             |
| Largest diff. peak and hole       | 0.575 and -0.841 e.Å <sup>-3</sup>                                                                              |

Atomic coordinates (  $\times 10^4$ ) and equivalent isotropic displacement parameters ( $\text{\AA}^2 \times 10^3$ ) for fw-02-01.  
 $U(\text{eq})$  is defined as one third of the trace of the orthogonalized  $U_{ij}$  tensor.

|       | x       | y       | z        | $U(\text{eq})$ |
|-------|---------|---------|----------|----------------|
| Br(1) | 7920(1) | 9277(1) | 3166(1)  | 38(1)          |
| S(1)  | 5888(1) | 2241(2) | 7163(3)  | 29(1)          |
| S(2)  | 5752(1) | 574(2)  | 5403(3)  | 34(1)          |
| S(3)  | 4751(1) | 835(2)  | 4655(3)  | 35(1)          |
| S(4)  | 4752(1) | 2699(2) | 3100(3)  | 35(1)          |
| S(5)  | 4834(1) | 4566(2) | 4643(3)  | 32(1)          |
| O(1)  | 7385(3) | 4003(5) | 6708(7)  | 32(1)          |
| N(1)  | 6791(3) | 5708(6) | 4982(8)  | 28(1)          |
| C(1)  | 8441(4) | 2585(9) | 6615(12) | 40(2)          |
| C(2)  | 7771(4) | 2863(9) | 5764(10) | 34(2)          |
| C(3)  | 6800(4) | 4445(9) | 5958(10) | 29(2)          |
| C(4)  | 6144(4) | 3834(8) | 6010(10) | 30(2)          |
| C(5)  | 5716(4) | 4748(8) | 4988(10) | 27(2)          |
| C(6)  | 6127(4) | 5918(8) | 4357(9)  | 27(2)          |
| C(7)  | 6018(3) | 7134(7) | 3254(11) | 30(2)          |
| C(8)  | 6551(4) | 8101(8) | 2869(9)  | 29(2)          |
| C(9)  | 7201(4) | 7855(9) | 3611(10) | 33(2)          |
| C(10) | 7328(4) | 6673(8) | 4629(10) | 29(2)          |

Bond lengths [Å] and angles [deg] for fw-02-01.

---

|                 |            |
|-----------------|------------|
| Br(1)-C(9)      | 1.899(7)   |
| S(1)-C(4)       | 1.751(8)   |
| S(1)-S(2)       | 2.065(3)   |
| S(2)-S(3)       | 2.047(3)   |
| S(3)-S(4)       | 2.065(3)   |
| S(4)-S(5)       | 2.067(3)   |
| S(5)-C(5)       | 1.740(7)   |
| O(1)-C(3)       | 1.347(9)   |
| O(1)-C(2)       | 1.465(9)   |
| N(1)-C(3)       | 1.361(9)   |
| N(1)-C(10)      | 1.368(9)   |
| N(1)-C(6)       | 1.399(9)   |
| C(1)-C(2)       | 1.494(11)  |
| C(3)-C(4)       | 1.378(11)  |
| C(4)-C(5)       | 1.423(11)  |
| C(5)-C(6)       | 1.392(10)  |
| C(6)-C(7)       | 1.409(10)  |
| C(7)-C(8)       | 1.369(10)  |
| C(8)-C(9)       | 1.416(10)  |
| C(9)-C(10)      | 1.348(11)  |
|                 |            |
| C(4)-S(1)-S(2)  | 102.4(3)   |
| S(3)-S(2)-S(1)  | 104.66(11) |
| S(2)-S(3)-S(4)  | 105.73(11) |
| S(3)-S(4)-S(5)  | 103.83(13) |
| C(5)-S(5)-S(4)  | 104.3(3)   |
| C(3)-O(1)-C(2)  | 112.4(6)   |
| C(3)-N(1)-C(10) | 127.8(7)   |
| C(3)-N(1)-C(6)  | 109.4(6)   |
| C(10)-N(1)-C(6) | 122.8(6)   |
| O(1)-C(2)-C(1)  | 107.8(7)   |
| O(1)-C(3)-N(1)  | 120.7(7)   |
| O(1)-C(3)-C(4)  | 130.7(7)   |
| N(1)-C(3)-C(4)  | 108.6(7)   |
| C(3)-C(4)-C(5)  | 107.6(7)   |
| C(3)-C(4)-S(1)  | 125.7(6)   |
| C(5)-C(4)-S(1)  | 126.6(6)   |

|                  |          |
|------------------|----------|
| C(6)-C(5)-C(4)   | 107.2(6) |
| C(6)-C(5)-S(5)   | 124.6(6) |
| C(4)-C(5)-S(5)   | 128.1(6) |
| C(5)-C(6)-N(1)   | 107.1(6) |
| C(5)-C(6)-C(7)   | 134.7(7) |
| N(1)-C(6)-C(7)   | 118.1(6) |
| C(8)-C(7)-C(6)   | 119.9(7) |
| C(7)-C(8)-C(9)   | 118.6(7) |
| C(10)-C(9)-C(8)  | 123.0(7) |
| C(10)-C(9)-Br(1) | 118.9(6) |
| C(8)-C(9)-Br(1)  | 118.1(6) |
| C(9)-C(10)-N(1)  | 117.5(7) |

---

Anisotropic displacement parameters ( $\text{\AA}^2 \times 10^3$ ) for fw-02-01.

The anisotropic displacement factor exponent takes the form:

$$-2 \pi^2 [ h^2 a^{*2} U_{11} + \dots + 2 h k a^* b^* U_{12} ]$$

|       | U11   | U22   | U33   | U23   | U13   | U12   |
|-------|-------|-------|-------|-------|-------|-------|
| Br(1) | 34(1) | 38(1) | 42(1) | 4(1)  | 0(1)  | -9(1) |
| S(1)  | 31(1) | 27(1) | 29(1) | 3(1)  | -1(1) | 1(1)  |
| S(2)  | 38(1) | 30(1) | 33(1) | -1(1) | 2(1)  | 2(1)  |
| S(3)  | 39(1) | 32(1) | 35(1) | 1(1)  | -2(1) | -7(1) |
| S(4)  | 36(1) | 36(1) | 33(1) | 4(1)  | -6(1) | -6(1) |
| S(5)  | 25(1) | 32(1) | 38(1) | 2(1)  | -1(1) | 0(1)  |
| O(1)  | 28(3) | 38(3) | 29(3) | 2(2)  | -2(2) | 3(2)  |
| N(1)  | 30(3) | 28(3) | 26(4) | 1(3)  | -3(3) | -4(3) |
| C(1)  | 35(4) | 41(4) | 45(6) | -1(4) | -5(4) | 8(3)  |
| C(2)  | 33(4) | 40(4) | 31(5) | -8(4) | 0(4)  | 6(3)  |
| C(3)  | 28(4) | 34(4) | 26(4) | 1(3)  | -1(3) | 7(3)  |
| C(4)  | 35(4) | 30(4) | 26(4) | -2(3) | 1(3)  | -3(3) |
| C(5)  | 25(4) | 27(3) | 28(4) | -1(3) | -2(3) | -3(3) |
| C(6)  | 24(4) | 28(3) | 28(4) | -1(3) | 2(3)  | 0(3)  |
| C(7)  | 26(3) | 32(3) | 31(4) | -5(4) | 4(4)  | -1(3) |
| C(8)  | 32(4) | 29(4) | 25(5) | 7(3)  | 1(3)  | 3(3)  |
| C(9)  | 25(4) | 37(4) | 39(5) | -3(3) | 7(3)  | -4(3) |
| C(10) | 28(4) | 30(4) | 29(4) | -3(4) | -1(4) | -3(3) |

Hydrogen coordinates (  $\times 10^4$ ) and isotropic displacement parameters ( $\text{\AA}^2 \times 10^3$ ) for fw-02-01.

|       | x    | y    | z    | U(eq) |
|-------|------|------|------|-------|
| H(1A) | 8698 | 3551 | 6693 | 60    |
| H(1B) | 8712 | 1834 | 5998 | 60    |
| H(1C) | 8351 | 2186 | 7710 | 60    |
| H(2A) | 7856 | 3250 | 4648 | 41    |
| H(2B) | 7505 | 1895 | 5687 | 41    |
| H(7)  | 5576 | 7282 | 2778 | 36    |
| H(8)  | 6485 | 8921 | 2121 | 35    |
| H(10) | 7773 | 6517 | 5084 | 35    |

Hydrogen bonds for fw-02-01 [ $\text{\AA}$  and deg.].

| D-H...A             | d(D-H) | d(H...A) | d(D...A)  | $\angle(\text{DHA})$ |
|---------------------|--------|----------|-----------|----------------------|
| C(2)-H(2A)...O(1)#1 | 0.99   | 2.55     | 3.489(10) | 159.3                |
| C(7)-H(7)...S(1)#2  | 0.95   | 2.91     | 3.840(7)  | 165.7                |

Symmetry transformations used to generate equivalent atoms:

#1  $-x+3/2, y, z-1/2$  #2  $-x+1, -y+1, z-1/2$

**Table S12.** Crystal data and structure refinement for 6-ethoxy-9-iodo-[1,2,3,4,5]pentathiepine[6,7-a]indolizine (**3e**).

|                                   |                                                                                                                    |
|-----------------------------------|--------------------------------------------------------------------------------------------------------------------|
| Identification code               | RT125                                                                                                              |
| Empirical formula                 | C <sub>10</sub> H <sub>8</sub> NIS <sub>5</sub> O                                                                  |
| Formula weight                    | 445.37                                                                                                             |
| Temperature                       | 100(2) K                                                                                                           |
| Wavelength                        | 1.54184 Å                                                                                                          |
| Crystal system, space group       | Orthorhombic, P c a 21                                                                                             |
| Unit cell dimensions              | a = 19.6206(3) Å    alpha = 90 deg.<br>b = 8.82190(10) Å    beta = 90 deg.<br>c = 8.23530(10) Å    gamma = 90 deg. |
| Volume                            | 1425.46(3) Å <sup>3</sup>                                                                                          |
| Z, calculated density             | 4, 2.075 Mg/m <sup>3</sup>                                                                                         |
| Absorption coefficient            | 24.394 mm <sup>-1</sup>                                                                                            |
| F(000)                            | 864                                                                                                                |
| Crystal size                      | 0.207 x 0.100 x 0.049 mm                                                                                           |
| Theta range for data collection   | 4.507 to 74.498 deg.                                                                                               |
| Limiting indices                  | -24<=h<=24, -11<=k<=10, -8<=l<=10                                                                                  |
| Reflections collected / unique    | 15433 / 2509 [R(int) = 0.0631]                                                                                     |
| Completeness to theta =           | 0.770    0.0 %                                                                                                     |
| Absorption correction             | Numerical                                                                                                          |
| Max. and min. transmission        | 0.48 and 0.09                                                                                                      |
| Refinement method                 | Full-matrix least-squares on F <sup>2</sup>                                                                        |
| Data / restraints / parameters    | 2509 / 1 / 165                                                                                                     |
| Goodness-of-fit on F <sup>2</sup> | 1.156                                                                                                              |
| Final R indices [I>2sigma(I)]     | R1 = 0.0424, wR2 = 0.1236                                                                                          |
| R indices (all data)              | R1 = 0.0426, wR2 = 0.1237                                                                                          |
| Absolute structure parameter      | 0.057(15)                                                                                                          |
| Extinction coefficient            | n/a                                                                                                                |
| Largest diff. peak and hole       | 2.280 and -0.967 e.Å <sup>-3</sup>                                                                                 |

Atomic coordinates (  $\times 10^4$ ) and equivalent isotropic displacement parameters ( $\text{\AA}^2 \times 10^3$ ) for RT125.  
 $U(\text{eq})$  is defined as one third of the trace of the orthogonalized  $U_{ij}$  tensor.

|       | x       | y         | z        | $U(\text{eq})$ |
|-------|---------|-----------|----------|----------------|
| I(1)  | 2073(1) | 4410(1)   | 7787(1)  | 24(1)          |
| S(1)  | 4124(1) | -2738(3)  | 3810(3)  | 17(1)          |
| S(2)  | 4248(1) | -4391(3)  | 5585(4)  | 21(1)          |
| S(3)  | 5242(1) | -4143(3)  | 6350(4)  | 22(1)          |
| S(4)  | 5235(1) | -2292(2)  | 7888(4)  | 22(1)          |
| S(5)  | 5173(1) | -455(3)   | 6332(4)  | 19(1)          |
| O(1)  | 2650(3) | -927(8)   | 4202(10) | 19(1)          |
| N(1)  | 3241(4) | 714(9)    | 5944(12) | 16(2)          |
| C(1)  | 3229(5) | -535(10)  | 4967(14) | 16(2)          |
| C(2)  | 3878(5) | -1167(10) | 4932(13) | 15(2)          |
| C(3)  | 4298(5) | -236(10)  | 5941(13) | 15(2)          |
| C(4)  | 3897(5) | 915(11)   | 6603(13) | 15(2)          |
| C(5)  | 4008(5) | 2100(10)  | 7682(16) | 19(2)          |
| C(6)  | 3482(5) | 3083(10)  | 8063(14) | 19(2)          |
| C(7)  | 2828(5) | 2866(12)  | 7331(14) | 19(2)          |
| C(8)  | 2712(5) | 1700(11)  | 6302(13) | 18(2)          |
| C(9)  | 2251(5) | -2017(12) | 5177(14) | 20(2)          |
| C(10) | 1583(5) | -2262(13) | 4299(16) | 27(2)          |

Bond lengths [Å] and angles [deg] for RT125.

---

|                |            |
|----------------|------------|
| I(1)-C(7)      | 2.047(10)  |
| S(1)-C(2)      | 1.734(10)  |
| S(1)-S(2)      | 2.079(4)   |
| S(2)-S(3)      | 2.060(4)   |
| S(3)-S(4)      | 2.067(4)   |
| S(4)-S(5)      | 2.069(4)   |
| S(5)-C(3)      | 1.758(10)  |
| O(1)-C(1)      | 1.344(13)  |
| O(1)-C(9)      | 1.477(12)  |
| N(1)-C(1)      | 1.364(13)  |
| N(1)-C(8)      | 1.386(12)  |
| N(1)-C(4)      | 1.407(12)  |
| C(1)-C(2)      | 1.391(13)  |
| C(2)-C(3)      | 1.430(13)  |
| C(3)-C(4)      | 1.396(13)  |
| C(4)-C(5)      | 1.389(15)  |
| C(5)-C(6)      | 1.385(13)  |
| C(6)-C(7)      | 1.430(14)  |
| C(7)-C(8)      | 1.352(16)  |
| C(9)-C(10)     | 1.513(14)  |
|                |            |
| C(2)-S(1)-S(2) | 102.6(4)   |
| S(3)-S(2)-S(1) | 104.56(14) |
| S(2)-S(3)-S(4) | 105.40(14) |
| S(3)-S(4)-S(5) | 103.86(18) |
| C(3)-S(5)-S(4) | 104.9(3)   |
| C(1)-O(1)-C(9) | 111.1(8)   |
| C(1)-N(1)-C(8) | 128.2(9)   |
| C(1)-N(1)-C(4) | 110.2(8)   |
| C(8)-N(1)-C(4) | 121.6(9)   |
| O(1)-C(1)-N(1) | 120.0(9)   |
| O(1)-C(1)-C(2) | 131.4(9)   |
| N(1)-C(1)-C(2) | 108.6(9)   |
| C(1)-C(2)-C(3) | 106.6(8)   |
| C(1)-C(2)-S(1) | 125.9(8)   |
| C(3)-C(2)-S(1) | 127.4(7)   |
| C(4)-C(3)-C(2) | 108.6(8)   |

|                 |           |
|-----------------|-----------|
| C(4)-C(3)-S(5)  | 124.0(8)  |
| C(2)-C(3)-S(5)  | 127.3(7)  |
| C(5)-C(4)-C(3)  | 135.1(9)  |
| C(5)-C(4)-N(1)  | 119.0(9)  |
| C(3)-C(4)-N(1)  | 105.9(9)  |
| C(6)-C(5)-C(4)  | 119.9(9)  |
| C(5)-C(6)-C(7)  | 119.3(10) |
| C(8)-C(7)-C(6)  | 121.1(9)  |
| C(8)-C(7)-I(1)  | 119.9(7)  |
| C(6)-C(7)-I(1)  | 118.9(8)  |
| C(7)-C(8)-N(1)  | 119.0(9)  |
| O(1)-C(9)-C(10) | 107.0(9)  |

---

Anisotropic displacement parameters ( $\text{\AA}^2 \times 10^3$ ) for RT125.

The anisotropic displacement factor exponent takes the form:

$$-2 \pi^2 [ h^2 a^{*2} U_{11} + \dots + 2 h k a^* b^* U_{12} ]$$

---

|       | U11   | U22   | U33   | U23   | U13   | U12   |
|-------|-------|-------|-------|-------|-------|-------|
| <hr/> |       |       |       |       |       |       |
| I(1)  | 21(1) | 24(1) | 27(1) | 0(1)  | 0(1)  | 4(1)  |
| S(1)  | 16(1) | 17(1) | 19(1) | -1(1) | 1(1)  | -1(1) |
| S(2)  | 22(1) | 19(1) | 21(1) | 2(1)  | 2(1)  | 0(1)  |
| S(3)  | 21(1) | 19(1) | 25(1) | 0(1)  | -1(1) | 6(1)  |
| S(4)  | 21(1) | 22(1) | 23(1) | -3(1) | -3(1) | 5(1)  |
| S(5)  | 12(1) | 19(1) | 27(2) | -2(1) | 0(1)  | -2(1) |
| O(1)  | 16(3) | 25(3) | 16(4) | 0(3)  | -2(3) | -2(3) |
| N(1)  | 16(4) | 14(4) | 18(5) | 1(3)  | -1(3) | 1(3)  |
| C(1)  | 16(4) | 18(4) | 15(5) | -1(4) | -3(4) | 1(3)  |
| C(2)  | 16(4) | 10(4) | 19(5) | -1(4) | -1(4) | -2(3) |
| C(3)  | 16(4) | 12(4) | 18(5) | 0(4)  | 3(4)  | 1(3)  |
| C(4)  | 15(4) | 12(4) | 17(5) | 5(4)  | 1(4)  | 0(3)  |
| C(5)  | 20(4) | 16(4) | 22(5) | 5(5)  | -5(4) | -3(3) |
| C(6)  | 22(4) | 17(4) | 18(6) | -1(4) | -1(4) | -2(3) |
| C(7)  | 15(4) | 20(5) | 23(6) | 2(4)  | 2(4)  | 7(3)  |
| C(8)  | 16(4) | 20(4) | 18(5) | 2(4)  | 2(4)  | 6(3)  |
| C(9)  | 19(4) | 24(4) | 17(5) | 2(4)  | -2(4) | -4(4) |
| C(10) | 16(5) | 34(6) | 30(7) | 2(5)  | -4(4) | -6(4) |

---

Torsion angles [deg] for RT125.

---

|                      |            |
|----------------------|------------|
| C(9)-O(1)-C(1)-N(1)  | -92.4(11)  |
| C(9)-O(1)-C(1)-C(2)  | 89.7(14)   |
| C(8)-N(1)-C(1)-O(1)  | 0.5(16)    |
| C(4)-N(1)-C(1)-O(1)  | -179.5(9)  |
| C(8)-N(1)-C(1)-C(2)  | 178.8(10)  |
| C(4)-N(1)-C(1)-C(2)  | -1.2(12)   |
| O(1)-C(1)-C(2)-C(3)  | 177.8(11)  |
| N(1)-C(1)-C(2)-C(3)  | -0.2(12)   |
| O(1)-C(1)-C(2)-S(1)  | 0.0(18)    |
| N(1)-C(1)-C(2)-S(1)  | -178.0(8)  |
| S(2)-S(1)-C(2)-C(1)  | -108.1(9)  |
| S(2)-S(1)-C(2)-C(3)  | 74.6(9)    |
| C(1)-C(2)-C(3)-C(4)  | 1.6(12)    |
| S(1)-C(2)-C(3)-C(4)  | 179.3(8)   |
| C(1)-C(2)-C(3)-S(5)  | -178.7(8)  |
| S(1)-C(2)-C(3)-S(5)  | -1.0(15)   |
| S(4)-S(5)-C(3)-C(4)  | 105.7(9)   |
| S(4)-S(5)-C(3)-C(2)  | -74.0(10)  |
| C(2)-C(3)-C(4)-C(5)  | 177.6(12)  |
| S(5)-C(3)-C(4)-C(5)  | -2.2(18)   |
| C(2)-C(3)-C(4)-N(1)  | -2.2(11)   |
| S(5)-C(3)-C(4)-N(1)  | 178.0(7)   |
| C(1)-N(1)-C(4)-C(5)  | -177.7(10) |
| C(8)-N(1)-C(4)-C(5)  | 2.3(14)    |
| C(1)-N(1)-C(4)-C(3)  | 2.1(11)    |
| C(8)-N(1)-C(4)-C(3)  | -177.8(9)  |
| C(3)-C(4)-C(5)-C(6)  | 178.7(11)  |
| N(1)-C(4)-C(5)-C(6)  | -1.6(15)   |
| C(4)-C(5)-C(6)-C(7)  | -0.3(16)   |
| C(5)-C(6)-C(7)-C(8)  | 1.5(16)    |
| C(5)-C(6)-C(7)-I(1)  | -175.9(8)  |
| C(6)-C(7)-C(8)-N(1)  | -0.8(16)   |
| I(1)-C(7)-C(8)-N(1)  | 176.6(7)   |
| C(1)-N(1)-C(8)-C(7)  | 178.9(10)  |
| C(4)-N(1)-C(8)-C(7)  | -1.1(15)   |
| C(1)-O(1)-C(9)-C(10) | 174.4(9)   |

---

Hydrogen bonds for RT125 [A and deg.].

| D-H...A             | d(D-H) | d(H...A) | d(D...A)  | <(DHA) |
|---------------------|--------|----------|-----------|--------|
| C(9)-H(9A)...O(1)#1 | 0.99   | 2.51     | 3.457(14) | 160.7  |
| C(9)-H(9B)...I(1)#2 | 0.99   | 3.20     | 3.831(11) | 123.1  |
| C(5)-H(5)...S(1)#3  | 0.95   | 2.89     | 3.822(10) | 166.3  |
| C(9)-H(9B)...I(1)#4 | 0.99   | 3.19     | 3.946(11) | 134.1  |

Symmetry transformations used to generate equivalent atoms:

#1 -x+1/2,y,z+1/2 #2 x,y-1,z #3 -x+1,-y,z+1/2

#4 -x+1/2,y-1,z-1/2

**Table S13.** Crystal data and structure refinement for 6-ethoxy-9-nitro-[1,2,3,4,5]pentathiepine[6,7-a]indolizine (**3f**).

|                                 |                                                                                                                                   |
|---------------------------------|-----------------------------------------------------------------------------------------------------------------------------------|
| Identification code             | RT50                                                                                                                              |
| Empirical formula               | C <sub>10</sub> H <sub>8</sub> N <sub>2</sub> S <sub>5</sub> O <sub>3</sub>                                                       |
| Formula weight                  | 364.48                                                                                                                            |
| Temperature                     | 170(2) K                                                                                                                          |
| Wavelength                      | 0.71073 Å                                                                                                                         |
| Crystal system, space group     | Orthorhombic, P -1                                                                                                                |
| Unit cell dimensions            | a = 7.7568(16) Å    alpha = 89.31(3) deg.<br>b = 9.1803(18) Å    beta = 78.99(3) deg.<br>c = 10.401(2) Å    gamma = 76.65(3) deg. |
| Volume                          | 707.0(3) Å <sup>3</sup>                                                                                                           |
| Z, calculated density           | 2, 1.712 Mg/m <sup>3</sup>                                                                                                        |
| Absorption coefficient          | 0.825 mm <sup>-1</sup>                                                                                                            |
| F(000)                          | 372                                                                                                                               |
| Crystal size                    | 0.229 x 0.210 x 0.181 mm                                                                                                          |
| Theta range for data collection | 1.996 to 29.543 deg.                                                                                                              |
| Limiting indices                | -10<=h<=10, -12<=k<=12, -14<=l<=14                                                                                                |
| Reflections collected / unique  | 7776 / 3862 [R(int) = 0.0261]                                                                                                     |
| Completeness to theta =         | 98.9 %                                                                                                                            |

|                                   |                                             |
|-----------------------------------|---------------------------------------------|
| Absorption correction             | Numerical                                   |
| Max. and min. transmission        | 0.7981 and 0.6942                           |
| Refinement method                 | Full-matrix least-squares on F <sup>2</sup> |
| Data / restraints / parameters    | 3862 / 0 / 182                              |
| Goodness-of-fit on F <sup>2</sup> | 1.112                                       |
| Final R indices [I > 2σ(I)]       | R1 = 0.0362, wR2 = 0.0989                   |
| R indices (all data)              | R1 = 0.0483, wR2 = 0.1041                   |
| Extinction coefficient            | n/a                                         |
| Largest diff. peak and hole       | 0.882 and -0.466 e.Å <sup>-3</sup>          |

Table 2. Atomic coordinates (x 10<sup>4</sup>) and equivalent isotropic displacement parameters (Å<sup>2</sup> x 10<sup>3</sup>) for rt50.

U(eq) is defined as one third of the trace of the orthogonalized U<sub>ij</sub> tensor.

|       | x       | y       | z       | U(eq) |
|-------|---------|---------|---------|-------|
| S(1)  | 5484(1) | 8440(1) | 3271(1) | 36(1) |
| S(2)  | 5016(1) | 8077(1) | 5251(1) | 35(1) |
| S(3)  | 7486(1) | 6951(1) | 5603(1) | 38(1) |
| S(4)  | 7687(1) | 4797(1) | 5004(1) | 34(1) |
| S(5)  | 8441(1) | 4797(1) | 2995(1) | 33(1) |
| O(1)  | 2297(2) | 7727(2) | 1851(1) | 38(1) |
| O(2)  | 663(2)  | 3315(2) | 37(2)   | 46(1) |
| O(3)  | 2635(2) | 1218(2) | -235(2) | 45(1) |
| N(1)  | 3962(2) | 5253(2) | 1634(1) | 25(1) |
| N(2)  | 2125(2) | 2524(2) | 139(2)  | 32(1) |
| C(1)  | 32(4)   | 9893(3) | 2623(3) | 74(1) |
| C(2)  | 937(4)  | 8398(3) | 2941(3) | 57(1) |
| C(3)  | 3724(2) | 6709(2) | 2074(2) | 28(1) |
| C(4)  | 5193(3) | 6797(2) | 2607(2) | 28(1) |
| C(5)  | 6371(2) | 5344(2) | 2500(2) | 28(1) |
| C(6)  | 5608(2) | 4396(2) | 1893(2) | 26(1) |
| C(7)  | 6100(3) | 2863(2) | 1518(2) | 29(1) |
| C(8)  | 4987(3) | 2240(2) | 947(2)  | 31(1) |
| C(9)  | 3337(2) | 3176(2) | 738(2)  | 27(1) |
| C(10) | 2825(2) | 4652(2) | 1060(2) | 26(1) |

Table 3. Bond lengths [Å] and angles [deg] for rt50.

---

|                 |            |
|-----------------|------------|
| S(1)-C(4)       | 1.745(2)   |
| S(1)-S(2)       | 2.0593(8)  |
| S(2)-S(3)       | 2.0530(10) |
| S(3)-S(4)       | 2.0427(9)  |
| S(4)-S(5)       | 2.0598(9)  |
| S(5)-C(5)       | 1.7420(19) |
| O(1)-C(3)       | 1.330(2)   |
| O(1)-C(2)       | 1.428(3)   |
| O(2)-N(2)       | 1.219(2)   |
| O(3)-N(2)       | 1.217(2)   |
| N(1)-C(10)      | 1.368(2)   |
| N(1)-C(3)       | 1.378(2)   |
| N(1)-C(6)       | 1.409(2)   |
| N(2)-C(9)       | 1.457(2)   |
| C(1)-C(2)       | 1.456(4)   |
| C(3)-C(4)       | 1.376(3)   |
| C(4)-C(5)       | 1.425(3)   |
| C(5)-C(6)       | 1.377(3)   |
| C(6)-C(7)       | 1.410(3)   |
| C(7)-C(8)       | 1.363(3)   |
| C(8)-C(9)       | 1.421(3)   |
| C(9)-C(10)      | 1.349(3)   |
|                 |            |
| C(4)-S(1)-S(2)  | 102.38(7)  |
| S(3)-S(2)-S(1)  | 104.27(4)  |
| S(4)-S(3)-S(2)  | 103.58(4)  |
| S(3)-S(4)-S(5)  | 104.38(4)  |
| C(5)-S(5)-S(4)  | 102.47(7)  |
| C(3)-O(1)-C(2)  | 118.72(17) |
| C(10)-N(1)-C(3) | 128.19(15) |
| C(10)-N(1)-C(6) | 122.76(16) |
| C(3)-N(1)-C(6)  | 109.03(15) |
| O(3)-N(2)-O(2)  | 123.70(18) |
| O(3)-N(2)-C(9)  | 117.85(16) |
| O(2)-N(2)-C(9)  | 118.45(16) |
| O(1)-C(2)-C(1)  | 109.9(2)   |
| O(1)-C(3)-C(4)  | 133.09(18) |
| O(1)-C(3)-N(1)  | 118.62(16) |
| C(4)-C(3)-N(1)  | 108.11(16) |
| C(3)-C(4)-C(5)  | 107.83(17) |
| C(3)-C(4)-S(1)  | 124.14(15) |
| C(5)-C(4)-S(1)  | 128.04(14) |
| C(6)-C(5)-C(4)  | 107.91(16) |
| C(6)-C(5)-S(5)  | 124.09(15) |
| C(4)-C(5)-S(5)  | 127.99(15) |
| C(5)-C(6)-N(1)  | 107.12(16) |
| C(5)-C(6)-C(7)  | 135.00(17) |
| N(1)-C(6)-C(7)  | 117.89(17) |
| C(8)-C(7)-C(6)  | 120.35(17) |
| C(7)-C(8)-C(9)  | 118.28(18) |
| C(10)-C(9)-C(8) | 123.43(18) |
| C(10)-C(9)-N(2) | 117.61(16) |
| C(8)-C(9)-N(2)  | 118.96(17) |
| C(9)-C(10)-N(1) | 117.28(16) |

---

Symmetry transformations used to generate equivalent atoms:

Table 4. Anisotropic displacement parameters ( $\text{\AA}^2 \times 10^3$ ) for rt50.

The anisotropic displacement factor exponent takes the form:

$$-2 \pi^2 [ h^2 a^{*2} U_{11} + \dots + 2 h k a^* b^* U_{12} ]$$

|       | U11   | U22   | U33   | U23    | U13    | U12    |
|-------|-------|-------|-------|--------|--------|--------|
| S(1)  | 53(1) | 31(1) | 27(1) | 1(1)   | -11(1) | -15(1) |
| S(2)  | 47(1) | 34(1) | 26(1) | -3(1)  | -7(1)  | -11(1) |
| S(3)  | 44(1) | 48(1) | 28(1) | 1(1)   | -12(1) | -20(1) |
| S(4)  | 34(1) | 41(1) | 29(1) | 7(1)   | -11(1) | -11(1) |
| S(5)  | 27(1) | 44(1) | 29(1) | -1(1)  | -6(1)  | -7(1)  |
| O(1)  | 40(1) | 34(1) | 35(1) | -6(1)  | -13(1) | 7(1)   |
| O(2)  | 41(1) | 44(1) | 58(1) | -8(1)  | -24(1) | -5(1)  |
| O(3)  | 53(1) | 31(1) | 56(1) | -10(1) | -17(1) | -9(1)  |
| N(1)  | 28(1) | 25(1) | 22(1) | -2(1)  | -6(1)  | -3(1)  |
| N(2)  | 36(1) | 32(1) | 27(1) | -2(1)  | -8(1)  | -8(1)  |
| C(1)  | 73(2) | 46(2) | 78(2) | -1(2)  | 1(2)   | 22(1)  |
| C(2)  | 53(2) | 53(2) | 52(2) | 0(1)   | 2(1)   | 5(1)   |
| C(3)  | 32(1) | 25(1) | 24(1) | -1(1)  | -6(1)  | -1(1)  |
| C(4)  | 35(1) | 28(1) | 22(1) | 0(1)   | -6(1)  | -7(1)  |
| C(5)  | 29(1) | 31(1) | 22(1) | 1(1)   | -5(1)  | -6(1)  |
| C(6)  | 27(1) | 28(1) | 22(1) | 1(1)   | -5(1)  | -2(1)  |
| C(7)  | 30(1) | 28(1) | 26(1) | -1(1)  | -6(1)  | 0(1)   |
| C(8)  | 36(1) | 27(1) | 26(1) | -2(1)  | -6(1)  | -2(1)  |
| C(9)  | 31(1) | 29(1) | 22(1) | -2(1)  | -6(1)  | -7(1)  |
| C(10) | 27(1) | 29(1) | 22(1) | -1(1)  | -5(1)  | -4(1)  |

Table 5. Torsion angles [deg] for rt50.

---

|                      |             |
|----------------------|-------------|
| C(3)-O(1)-C(2)-C(1)  | 152.2(2)    |
| C(2)-O(1)-C(3)-C(4)  | -71.3(3)    |
| C(2)-O(1)-C(3)-N(1)  | 114.2(2)    |
| C(10)-N(1)-C(3)-O(1) | -5.5(3)     |
| C(6)-N(1)-C(3)-O(1)  | 175.96(17)  |
| C(10)-N(1)-C(3)-C(4) | 178.72(17)  |
| C(6)-N(1)-C(3)-C(4)  | 0.2(2)      |
| O(1)-C(3)-C(4)-C(5)  | -175.3(2)   |
| N(1)-C(3)-C(4)-C(5)  | -0.4(2)     |
| O(1)-C(3)-C(4)-S(1)  | 4.3(3)      |
| N(1)-C(3)-C(4)-S(1)  | 179.21(13)  |
| S(2)-S(1)-C(4)-C(3)  | 107.12(17)  |
| S(2)-S(1)-C(4)-C(5)  | -73.34(18)  |
| C(3)-C(4)-C(5)-C(6)  | 0.5(2)      |
| S(1)-C(4)-C(5)-C(6)  | -179.09(14) |
| C(3)-C(4)-C(5)-S(5)  | 179.27(14)  |
| S(1)-C(4)-C(5)-S(5)  | -0.3(3)     |
| S(4)-S(5)-C(5)-C(6)  | -107.74(16) |
| S(4)-S(5)-C(5)-C(4)  | 73.68(18)   |
| C(4)-C(5)-C(6)-N(1)  | -0.4(2)     |
| S(5)-C(5)-C(6)-N(1)  | -179.22(13) |
| C(4)-C(5)-C(6)-C(7)  | -180.0(2)   |
| S(5)-C(5)-C(6)-C(7)  | 1.2(3)      |
| C(10)-N(1)-C(6)-C(5) | -178.50(16) |
| C(3)-N(1)-C(6)-C(5)  | 0.2(2)      |
| C(10)-N(1)-C(6)-C(7) | 1.2(3)      |
| C(3)-N(1)-C(6)-C(7)  | 179.80(16)  |
| C(5)-C(6)-C(7)-C(8)  | 178.3(2)    |
| N(1)-C(6)-C(7)-C(8)  | -1.3(3)     |
| C(6)-C(7)-C(8)-C(9)  | 0.3(3)      |
| C(7)-C(8)-C(9)-C(10) | 0.9(3)      |
| C(7)-C(8)-C(9)-N(2)  | -179.47(17) |
| O(3)-N(2)-C(9)-C(10) | 175.07(18)  |
| O(2)-N(2)-C(9)-C(10) | -4.8(3)     |
| O(3)-N(2)-C(9)-C(8)  | -4.6(3)     |
| O(2)-N(2)-C(9)-C(8)  | 175.56(18)  |
| C(8)-C(9)-C(10)-N(1) | -1.0(3)     |
| N(2)-C(9)-C(10)-N(1) | 179.35(15)  |
| C(3)-N(1)-C(10)-C(9) | -178.44(17) |
| C(6)-N(1)-C(10)-C(9) | -0.1(3)     |

---

**Table S14.** Crystal data and structure refinement for 6-ethoxy-9-methyl-[1,2,3,4,5]pentathiepino[6,7-a]indolizine (**3g**).

|                                   |                                                                                                                      |
|-----------------------------------|----------------------------------------------------------------------------------------------------------------------|
| Identification code               | RT160                                                                                                                |
| Empirical formula                 | C <sub>11</sub> H <sub>11</sub> NS <sub>5</sub> O                                                                    |
| Formula weight                    | 333.51                                                                                                               |
| Temperature                       | 103(2) K                                                                                                             |
| Wavelength                        | 1.54184 Å                                                                                                            |
| Crystal system, space group       | Orthorhombic, P c a 21                                                                                               |
| Unit cell dimensions              | a = 19.29930(10) Å    alpha = 90 deg.<br>b = 8.63970(10) Å    beta = 90 deg.<br>c = 8.25520(10) Å    gamma = 90 deg. |
| Volume                            | 1376.47(2) Å <sup>3</sup>                                                                                            |
| Z, calculated value               | 4, 1.609 Mg/m <sup>3</sup>                                                                                           |
| Absorption coefficient            | 7.649 mm <sup>-1</sup>                                                                                               |
| F(000)                            | 688                                                                                                                  |
| Crystal size                      | 0.130 x 0.090 x 0.050 mm                                                                                             |
| Theta range for data collection   | 4.582 to 79.698 deg.                                                                                                 |
| Limiting indices                  | -24 ≤ h ≤ 24, -11 ≤ k ≤ 10, -10 ≤ l ≤ 10                                                                             |
| Reflections collected / unique    | 21710 / 2728 [R(int) = 0.0463]                                                                                       |
| Completeness to theta =           | 0.0 %                                                                                                                |
| Absorption correction             | Numerical                                                                                                            |
| Max. and min. transmission        | 1.000 and 0.804                                                                                                      |
| Refinement method                 | Full-matrix least-squares on F <sup>2</sup>                                                                          |
| Data / restraints / parameters    | 2728 / 1 / 165                                                                                                       |
| Goodness-of-fit on F <sup>2</sup> | 1.083                                                                                                                |
| Final R indices [I > 2σ(I)]       | R1 = 0.0318, wR2 = 0.0897                                                                                            |
| R indices (all data)              | R1 = 0.0320, wR2 = 0.0899                                                                                            |
| Absolute structure parameter      | -0.01(2)                                                                                                             |
| Extinction coefficient            | n/a                                                                                                                  |
| Largest diff. peak and hole       | 0.367 and -0.284 e.Å <sup>-3</sup>                                                                                   |

Table 2. Atomic coordinates ( $\times 10^4$ ) and equivalent isotropic displacement parameters ( $\text{\AA}^2 \times 10^3$ ) for rt160.  
 $U(\text{eq})$  is defined as one third of the trace of the orthogonalized  $U_{ij}$  tensor.

|       | x       | y       | z       | $U(\text{eq})$ |
|-------|---------|---------|---------|----------------|
| S(1)  | 5904(1) | 2257(1) | 2808(1) | 16(1)          |
| S(2)  | 5785(1) | 558(1)  | 4546(1) | 19(1)          |
| S(3)  | 4777(1) | 787(1)  | 5329(1) | 20(1)          |
| S(4)  | 4765(1) | 2673(1) | 6875(1) | 20(1)          |
| S(5)  | 4838(1) | 4569(1) | 5345(1) | 17(1)          |
| O(1)  | 7409(1) | 4002(2) | 3319(3) | 18(1)          |
| N(1)  | 6812(1) | 5709(3) | 5065(4) | 16(1)          |
| C(1)  | 6815(2) | 4445(3) | 4051(4) | 16(1)          |
| C(2)  | 6151(2) | 3856(3) | 3980(4) | 16(1)          |
| C(3)  | 5722(1) | 4777(3) | 5002(4) | 15(1)          |
| C(4)  | 6143(2) | 5925(3) | 5680(4) | 15(1)          |
| C(5)  | 6039(2) | 7154(3) | 6787(4) | 17(1)          |
| C(6)  | 6581(2) | 8089(3) | 7183(4) | 18(1)          |
| C(7)  | 7257(2) | 7867(3) | 6494(4) | 18(1)          |
| C(8)  | 7362(1) | 6669(3) | 5466(4) | 17(1)          |
| C(9)  | 7842(2) | 8957(4) | 6914(4) | 23(1)          |
| C(10) | 7786(2) | 2834(3) | 4254(4) | 21(1)          |
| C(11) | 8464(2) | 2578(4) | 3411(5) | 23(1)          |

Table 3. Bond lengths [Å] and angles [deg] for rt160.

---

|                 |            |
|-----------------|------------|
| S(1)-C(2)       | 1.753(3)   |
| S(1)-S(2)       | 2.0653(10) |
| S(2)-S(3)       | 2.0586(11) |
| S(3)-S(4)       | 2.0698(10) |
| S(4)-S(5)       | 2.0737(11) |
| S(5)-C(3)       | 1.740(3)   |
| O(1)-C(1)       | 1.352(4)   |
| O(1)-C(10)      | 1.464(4)   |
| N(1)-C(1)       | 1.376(4)   |
| N(1)-C(8)       | 1.387(4)   |
| N(1)-C(4)       | 1.400(4)   |
| C(1)-C(2)       | 1.379(4)   |
| C(2)-C(3)       | 1.425(4)   |
| C(3)-C(4)       | 1.398(4)   |
| C(4)-C(5)       | 1.416(4)   |
| C(5)-C(6)       | 1.362(4)   |
| C(6)-C(7)       | 1.436(5)   |
| C(7)-C(8)       | 1.354(5)   |
| C(7)-C(9)       | 1.510(4)   |
| C(10)-C(11)     | 1.498(5)   |
|                 |            |
| C(2)-S(1)-S(2)  | 101.99(11) |
| S(3)-S(2)-S(1)  | 104.75(4)  |
| S(2)-S(3)-S(4)  | 106.29(4)  |
| S(3)-S(4)-S(5)  | 104.21(5)  |
| C(3)-S(5)-S(4)  | 104.32(10) |
| C(1)-O(1)-C(10) | 112.4(2)   |
| C(1)-N(1)-C(8)  | 128.0(3)   |
| C(1)-N(1)-C(4)  | 109.2(2)   |
| C(8)-N(1)-C(4)  | 122.7(3)   |
| O(1)-C(1)-N(1)  | 120.0(3)   |
| O(1)-C(1)-C(2)  | 131.6(3)   |
| N(1)-C(1)-C(2)  | 108.4(3)   |
| C(1)-C(2)-C(3)  | 107.9(3)   |
| C(1)-C(2)-S(1)  | 124.6(2)   |
| C(3)-C(2)-S(1)  | 127.5(2)   |

|                  |          |
|------------------|----------|
| C(4)-C(3)-C(2)   | 107.2(3) |
| C(4)-C(3)-S(5)   | 125.3(2) |
| C(2)-C(3)-S(5)   | 127.5(2) |
| C(3)-C(4)-N(1)   | 107.2(2) |
| C(3)-C(4)-C(5)   | 135.1(3) |
| N(1)-C(4)-C(5)   | 117.6(3) |
| C(6)-C(5)-C(4)   | 119.5(3) |
| C(5)-C(6)-C(7)   | 121.6(3) |
| C(8)-C(7)-C(6)   | 119.1(3) |
| C(8)-C(7)-C(9)   | 120.6(3) |
| C(6)-C(7)-C(9)   | 120.3(3) |
| C(7)-C(8)-N(1)   | 119.5(3) |
| O(1)-C(10)-C(11) | 106.9(3) |

---

Symmetry transformations used to generate equivalent atoms:

Table 4. Anisotropic displacement parameters ( $\text{\AA}^2 \times 10^3$ ) for rt160.

The anisotropic displacement factor exponent takes the form:

$$-2 \pi^2 [ h^2 a^{*2} U_{11} + \dots + 2 h k a^* b^* U_{12} ]$$

|       | U11   | U22   | U33   | U23   | U13   | U12   |
|-------|-------|-------|-------|-------|-------|-------|
| S(1)  | 19(1) | 12(1) | 18(1) | -1(1) | 0(1)  | 0(1)  |
| S(2)  | 22(1) | 12(1) | 22(1) | 1(1)  | -2(1) | 2(1)  |
| S(3)  | 22(1) | 14(1) | 24(1) | 0(1)  | 1(1)  | -4(1) |
| S(4)  | 20(1) | 16(1) | 23(1) | -1(1) | 3(1)  | -4(1) |
| S(5)  | 14(1) | 14(1) | 25(1) | -1(1) | 0(1)  | 0(1)  |
| O(1)  | 18(1) | 16(1) | 20(1) | 1(1)  | 3(1)  | 2(1)  |
| N(1)  | 16(1) | 11(1) | 20(1) | 1(1)  | 2(1)  | 0(1)  |
| C(1)  | 17(1) | 14(1) | 16(1) | 0(1)  | 1(1)  | 1(1)  |
| C(2)  | 17(1) | 12(1) | 20(1) | -1(1) | 1(1)  | 0(1)  |
| C(3)  | 15(1) | 11(1) | 20(2) | 1(1)  | -1(1) | 1(1)  |
| C(4)  | 15(1) | 11(1) | 18(1) | 2(1)  | 2(1)  | 1(1)  |
| C(5)  | 19(1) | 12(1) | 21(2) | 2(1)  | 2(1)  | 1(1)  |
| C(6)  | 22(1) | 12(1) | 20(1) | -2(1) | -2(1) | 1(1)  |
| C(7)  | 19(1) | 13(1) | 21(2) | 2(1)  | -2(1) | -3(1) |
| C(8)  | 16(1) | 15(1) | 21(2) | 2(1)  | 0(1)  | -2(1) |
| C(9)  | 23(2) | 19(1) | 28(2) | -1(1) | -4(1) | -8(1) |
| C(10) | 19(1) | 20(1) | 23(2) | 1(1)  | 3(1)  | 5(1)  |
| C(11) | 19(2) | 25(1) | 26(2) | 0(1)  | 2(1)  | 4(1)  |

Table 5. Torsion angles [deg] for rt160.

---

|                       |           |
|-----------------------|-----------|
| C(10)-O(1)-C(1)-N(1)  | 92.7(3)   |
| C(10)-O(1)-C(1)-C(2)  | -88.0(4)  |
| C(8)-N(1)-C(1)-O(1)   | 0.6(5)    |
| C(4)-N(1)-C(1)-O(1)   | -179.5(3) |
| C(8)-N(1)-C(1)-C(2)   | -178.8(3) |
| C(4)-N(1)-C(1)-C(2)   | 1.1(3)    |
| O(1)-C(1)-C(2)-C(3)   | 179.9(3)  |
| N(1)-C(1)-C(2)-C(3)   | -0.7(3)   |
| O(1)-C(1)-C(2)-S(1)   | -0.4(5)   |
| N(1)-C(1)-C(2)-S(1)   | 179.0(2)  |
| S(2)-S(1)-C(2)-C(1)   | 105.7(3)  |
| S(2)-S(1)-C(2)-C(3)   | -74.7(3)  |
| C(1)-C(2)-C(3)-C(4)   | 0.1(4)    |
| S(1)-C(2)-C(3)-C(4)   | -179.6(2) |
| C(1)-C(2)-C(3)-S(5)   | 179.0(2)  |
| S(1)-C(2)-C(3)-S(5)   | -0.6(4)   |
| S(4)-S(5)-C(3)-C(4)   | -105.6(3) |
| S(4)-S(5)-C(3)-C(2)   | 75.6(3)   |
| C(2)-C(3)-C(4)-N(1)   | 0.5(3)    |
| S(5)-C(3)-C(4)-N(1)   | -178.4(2) |
| C(2)-C(3)-C(4)-C(5)   | -178.7(3) |
| S(5)-C(3)-C(4)-C(5)   | 2.3(5)    |
| C(1)-N(1)-C(4)-C(3)   | -1.0(3)   |
| C(8)-N(1)-C(4)-C(3)   | 178.9(3)  |
| C(1)-N(1)-C(4)-C(5)   | 178.4(3)  |
| C(8)-N(1)-C(4)-C(5)   | -1.7(4)   |
| C(3)-C(4)-C(5)-C(6)   | -179.5(3) |
| N(1)-C(4)-C(5)-C(6)   | 1.3(4)    |
| C(4)-C(5)-C(6)-C(7)   | 0.5(5)    |
| C(5)-C(6)-C(7)-C(8)   | -2.2(5)   |
| C(5)-C(6)-C(7)-C(9)   | 177.8(3)  |
| C(6)-C(7)-C(8)-N(1)   | 1.8(5)    |
| C(9)-C(7)-C(8)-N(1)   | -178.2(3) |
| C(1)-N(1)-C(8)-C(7)   | 180.0(3)  |
| C(4)-N(1)-C(8)-C(7)   | 0.1(5)    |
| C(1)-O(1)-C(10)-C(11) | -173.9(3) |

---

### Synthesis of precursor **1b**

The 5-fluoro-2-bromopyridine derivative was obtained following a classic Sandmeyer approach. A diazonium tetrafluoroborate salt from 5-amino-2-bromopyridine was isolated as reported in the literature, then heated up in hexane up to a maximum of 40 °C to give the desired product. Trials at 80 °C in toluene or boiling hexane resulted in unsatisfactory yields and the formation of numerous byproducts. Gentle heating was the key to reach an acceptable yield. The reaction (Figure S52) can be followed by TLC and its initiation is immediately noticeable since molecular nitrogen is formed and gas bubbles become visible. Product formation was supported by mass spectrometry and the compound was used for the next step without further purification.

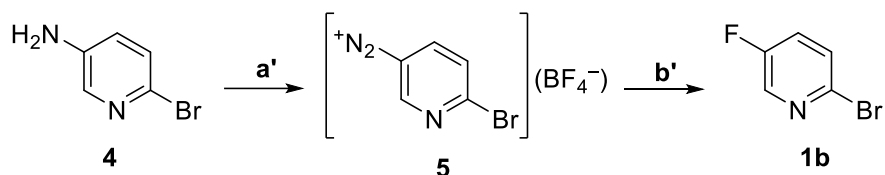

**a'**: HBF<sub>4</sub>, NaNO<sub>2</sub>, EtOH, H<sub>2</sub>O, 0 °C to RT, 30 min

**b'**: Hexane, 40 °C, overnight. Yield 57%.

**Figure S52.** Synthesis of **1b** through a diazonium salt intermediate followed by a Sandmeyer reaction.
